# Supplementary material for: DIVERT-Collaboration Action Research and Evaluation (CARE) Trial Protocol: a multiprovincial pragmatic cluster randomised trial of cardiorespiratory management in home care
Source: PubMed Central journal article supplement — BMJ Open. 2019 Dec 15;9(12):e030301. doi: 10.1136/bmjopen-2019-030301 (PMC6924743; doi:10.1136/bmjopen-2019-030301), 2019-12-15
Supplement: bmjopen-2019-030301.draft_revisions.pdf [file bmjopen-2019-030301.draft_revisions.pdf]

# BMJ Open

BMJ Open is committed to open peer review. As part of this commitment we make the peer review history of every article we publish publicly available.

When an article is published we post the peer reviewers' comments and the authors' responses online. We also post the versions of the paper that were used during peer review. These are the versions that the peer review comments apply to.

The versions of the paper that follow are the versions that were submitted during the peer review process. They are not the versions of record or the final published versions. They should not be cited or distributed as the published version of this manuscript.

BMJ Open is an open access journal and the full, final, typeset and author-corrected version of record of the manuscript is available on our site with no access controls, subscription charges or pay-per-view fees (<http://bmjopen.bmj.com>).

If you have any questions on BMJ Open's open peer review process please email [editorial.bmjopen@bmj.com](mailto:editorial.bmjopen@bmj.com)

# BMJ Open

## The DIVERT-CARE (Collaboration Action Research & Evaluation) Trial Protocol: A Multi-Provincial Pragmatic Cluster Randomized Trial of Cardio-Respiratory Management in Home Care

|                               |                                                                                                                                                                                                                                                                                                                                                                                                                                                                                                                                                                                                                                                                                                                                                                                                                                                                                                                                                                                                                                                                                                                                                                                                                                                                                                                                                                                                                                                                                                                                                                                                                                                                                                                                                                                                                                                                                                                                                                                                                                                                                                                                                                                                                                                                                                                                                                                         |
|-------------------------------|-----------------------------------------------------------------------------------------------------------------------------------------------------------------------------------------------------------------------------------------------------------------------------------------------------------------------------------------------------------------------------------------------------------------------------------------------------------------------------------------------------------------------------------------------------------------------------------------------------------------------------------------------------------------------------------------------------------------------------------------------------------------------------------------------------------------------------------------------------------------------------------------------------------------------------------------------------------------------------------------------------------------------------------------------------------------------------------------------------------------------------------------------------------------------------------------------------------------------------------------------------------------------------------------------------------------------------------------------------------------------------------------------------------------------------------------------------------------------------------------------------------------------------------------------------------------------------------------------------------------------------------------------------------------------------------------------------------------------------------------------------------------------------------------------------------------------------------------------------------------------------------------------------------------------------------------------------------------------------------------------------------------------------------------------------------------------------------------------------------------------------------------------------------------------------------------------------------------------------------------------------------------------------------------------------------------------------------------------------------------------------------------|
| Journal:                      | <i>BMJ Open</i>                                                                                                                                                                                                                                                                                                                                                                                                                                                                                                                                                                                                                                                                                                                                                                                                                                                                                                                                                                                                                                                                                                                                                                                                                                                                                                                                                                                                                                                                                                                                                                                                                                                                                                                                                                                                                                                                                                                                                                                                                                                                                                                                                                                                                                                                                                                                                                         |
| Manuscript ID                 | bmjopen-2019-030301                                                                                                                                                                                                                                                                                                                                                                                                                                                                                                                                                                                                                                                                                                                                                                                                                                                                                                                                                                                                                                                                                                                                                                                                                                                                                                                                                                                                                                                                                                                                                                                                                                                                                                                                                                                                                                                                                                                                                                                                                                                                                                                                                                                                                                                                                                                                                                     |
| Article Type:                 | Protocol                                                                                                                                                                                                                                                                                                                                                                                                                                                                                                                                                                                                                                                                                                                                                                                                                                                                                                                                                                                                                                                                                                                                                                                                                                                                                                                                                                                                                                                                                                                                                                                                                                                                                                                                                                                                                                                                                                                                                                                                                                                                                                                                                                                                                                                                                                                                                                                |
| Date Submitted by the Author: | 11-Mar-2019                                                                                                                                                                                                                                                                                                                                                                                                                                                                                                                                                                                                                                                                                                                                                                                                                                                                                                                                                                                                                                                                                                                                                                                                                                                                                                                                                                                                                                                                                                                                                                                                                                                                                                                                                                                                                                                                                                                                                                                                                                                                                                                                                                                                                                                                                                                                                                             |
| Complete List of Authors:     | <p>Costa, Andrew P ; McMaster University Faculty of Health Sciences, Department of Health Research Methods, Evidence, and Impact; McMaster University, Department of Medicine</p> <p>Schumacher, Connie; McMaster University Faculty of Health Sciences, Department of Health Research Methods, Evidence, and Impact; Hamilton Haldimand Niagara Brant Local Health Integration Network</p> <p>Jones, Aaron; McMaster University Faculty of Health Sciences, Department of Health Research Methods, Evidence, and Impact</p> <p>Dash, Darly; McMaster University Faculty of Health Sciences, Department of Health Research Methods, Evidence, and Impact</p> <p>Campbell, Graham; McMaster University Faculty of Health Sciences, Department of Health Research Methods, Evidence, and Impact</p> <p>Junek, Mats; McMaster University Faculty of Health Sciences, Department of Health Research Methods, Evidence, and Impact; McMaster University, Department of Medicine</p> <p>Agarwal, Gina; McMaster University, Department of Family Medicine; McMaster University Faculty of Health Sciences, Department of Health Research Methods, Evidence, and Impact</p> <p>Bell, Chaim; Mount Sinai Hospital, Department of Medicine</p> <p>Boscart, Veronique; Conestoga College Institute of Technology and Advanced Learning, Schlegel Centre for Advancing Seniors Care; Canadian Institutes of Health Research, Schlegel Industrial Research Chair in Seniors Care</p> <p>Bronskill, Susan; University of Toronto, Institute for Clinical Evaluative Sciences</p> <p>Feeny, David; McMaster University, Department of Economics</p> <p>Hébert, Paul C; Université de Montréal, Department of Medicine</p> <p>Heckman, George; University of Waterloo, School of Public Health and Health Systems; Schlegel Villages, Schlegel Research Chair in Geriatric Medicine</p> <p>Hirdes, John; University of Waterloo, School of Public Health and Health Systems</p> <p>Lee, Linda; McMaster University, Department of Family Medicine</p> <p>McKelvie, Robert; Western University, Department of Medicine; St. Joseph's Health Care London, Department of Medicine</p> <p>Mitchell, Lori; Winnipeg Regional Health Authority, Home Care</p> <p>Sinha, Samir; University of Toronto, Departments of Medicine, Family and Community Medicine, and Institute of Health Policy, Management</p> |

1  
2  
3  
4  
5  
6  
7  
8  
9  
10  
11  
12  
13  
14  
15  
16  
17  
18  
19  
20  
21  
22  
23  
24  
25  
26  
27  
28  
29  
30  
31  
32  
33  
34  
35  
36  
37  
38  
39  
40  
41  
42  
43  
44  
45  
46  
47  
48  
49  
50  
51  
52  
53  
54  
55  
56  
57  
58  
59  
60

|                  |                                                                                                                                                                                                                                                                                                                                                                                                                                                                                                                                                            |
|------------------|------------------------------------------------------------------------------------------------------------------------------------------------------------------------------------------------------------------------------------------------------------------------------------------------------------------------------------------------------------------------------------------------------------------------------------------------------------------------------------------------------------------------------------------------------------|
|                  | <p>and Evaluation<br/>         Davis, Joy; Western Health Care Corp, Information Management<br/>         Priddle, Tammy; Western Health Care Corp, Community Support<br/>         Rose, Joanne; Government of Newfoundland and Labrador, Department<br/>         of Health and Community Services<br/>         Gillan, Roslyn; Island Health, Community Health Services<br/>         Mills, Deborah; Island Health, Community Health Services<br/>         Haughton, Dilys; Hamilton Niagara Haldimand Brant Community Care<br/>         Access Centre</p> |
| <p>Keywords:</p> | <p>Cardio-Respiratory Disease Management, Chronic Disease Management,<br/>         Cluster-randomized, DIVERT Scale, Home Care</p>                                                                                                                                                                                                                                                                                                                                                                                                                         |
|                  |                                                                                                                                                                                                                                                                                                                                                                                                                                                                                                                                                            |

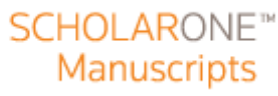

Version: 6.3(AC)

Date: March 8, 2019

**The DIVERT-CARE (Collaboration Action Research & Evaluation) Trial Protocol: A Multi-Provincial Pragmatic Cluster Randomized Trial of Cardio-Respiratory Management in Home Care**

Andrew P. Costa, Connie Schumacher, Aaron Jones, Darly Dash, Graham Campbell, Mats Junek, Gina Agarwal, Chaim Bell, Veronique Boscart, Susan Bronskill, David H. Feeny, Paul Hébert, George Heckman, John P. Hirdes, Linda Lee, Robert McKelvie, Lori Mitchell, Samir Sinha, Joy Davis, Tammy Priddle, Joanne Rose, Roslyn Gillan, Deborah Mills, Dilys Haughton

Andrew P. Costa, Department of Health Research Methods, Evidence, and Impact, McMaster University, Hamilton, Canada; Department of Medicine, McMaster University, Hamilton, Canada; Schlegel Chair in Clinical Epidemiology & Aging

Connie Schumacher, Department of Health Research Methods, Evidence, and Impact, McMaster University, Hamilton, Canada; Hamilton Niagara Haldimand Brant Local Health Integration Network, Hamilton, Ontario, Canada

Aaron Jones, Department of Health Research Methods, Evidence, and Impact, McMaster University, Hamilton, Canada

Darly Dash, Department of Health Research Methods, Evidence, and Impact, McMaster University, Hamilton, Canada

Graham Campbell, Department of Health Research Methods, Evidence, and Impact, McMaster University, Hamilton, Canada

Mats Junek, Department of Health Research Methods, Evidence, and Impact; Department of Medicine, McMaster University, Hamilton, Canada

Gina Agarwal, Department of Family Medicine, McMaster University, Hamilton, Canada; Department of Health Research Methods, Evidence, and Impact, McMaster University, Hamilton, Canada

Chaim M. Bell, Department of Medicine, Mount Sinai Hospital, Toronto, Canada

Veronique Boscart, Schlegel Centre for Advancing Seniors Care, Conestoga College Institute of Technology & Advanced Learning, Kitchener, Canada; CIHR/Schlegel Industrial Research Chair in Seniors Care

Susan E. Bronskill, Institute for Clinical Evaluative Sciences, Toronto, Canada

David H. Feeny, Department of Economics, McMaster University, Hamilton, Canada

Paul Hébert, Department of Medicine, Université de Montréal, Montréal, Canada

George A. Heckman, School of Public Health and Health Systems, University of Waterloo, Waterloo, Canada; Schlegel Research Chair in Geriatric Medicine

1  
2  
3 John P. Hirdes, School of Public Health and Health Systems, University of Waterloo, Waterloo,  
4 Canada

5  
6 Linda Lee, Department of Family Medicine, McMaster University, Hamilton, Canada

7  
8 Robert S. McKelvie, Professor, Department of Medicine (Cardiology), Western University and St.  
9 Joseph's Health Care, London, Canada

10  
11 Lori Mitchell, Home Care, Winnipeg Regional Health Authority, Winnipeg, Canada

12  
13 Samir K. Sinha, Departments of Medicine, Family and Community Medicine and Institute of  
14 Health Policy, Management and Evaluation, University of Toronto, Toronto, Canada

15  
16 Joy Davis, Information Management, Western Health, Corner Brook, Canada

17  
18 Tammy Priddle, Community Support, Western Health, Corner Brook, Canada

19  
20 Joanne Rose, Department of Health and Community Services, Government of Newfoundland  
21 and Labrador, St. John's, Canada

22  
23 Roslyn Gillan, Community Health Services, Island Health, Victoria, Canada

24  
25 Deborah Mills, Community Health Services, Island Health, Victoria, Canada

26  
27 Dilys Haughton, Niagara Haldimand Brant Community Care Access Centre, Hamilton, Ontario,  
28 Canada

29  
30 **Corresponding Author**

31 Andrew P Costa, Ph.D.

32 Schlegel Chair in Clinical Epidemiology & Aging

33 Dept. of Health Research Methods, Evidence, and Impact & Dept. of Medicine

34 McMaster University

35 CRL-219, 1280 Main St. W., Hamilton, ON, L8S 4K1

36 905 525 9140 x22067

37 acosta@mcmaster.ca

38  
39  
40 **(300 words abstract, 4000 words total)**

41  
42  
43 Abstract Word Count: 254

44  
45 Manuscript Word Count: 3,774

## ABSTRACT

### Introduction:

Home care clients are becoming increasingly medically complex, have limited access to effective chronic disease management, and have very high emergency department (ED) visitation rates. There is a need for more appropriate and targeted supportive chronic disease management for home care clients. We aim to evaluate the effectiveness and preliminary cost-effectiveness of a targeted, person-centered cardio-respiratory management model.

### Methods and analysis:

The DIVERT (Detection of Indicators and Vulnerabilities of Emergency Room Trips) – Care trial is a pragmatic, cluster-randomized, multi-center superiority trial of a flexible multi-component cardio-respiratory management model based on best-practice guidelines. The trial will be conducted in partnership with three regional, public-sector, home care providers across Canada. The primary outcome of the trial is to identify time to first unplanned ED visit within six months. Additional secondary outcomes are to identify changes in patient activation, changes in cardio-respiratory symptom frequencies, and cost-effectiveness over six months. We will also investigate the difference in the number of unplanned ED visits, number of inpatient hospitalizations, and changes in health-related quality of life. Multi-level proportional hazard and generalized linear models will be used to test the primary and secondary hypotheses. Sample size simulations indicate that enrolling 1,100 home care clients across 36 clusters (home care caseloads) will yield a power of 81% given a hazard ratio of 0.75.

### Ethics and dissemination:

Ethics approval was obtained at all participating sites. Results will be submitted for publication in peer-reviewed journals and conference presentations. Home care service partners will also be informed of the study's results. The results will be used to inform future support strategies for older adults receiving home care services.

**Trial registration number:** ClinicalTrials.gov: NCT03012256

**Keywords:** Cardio-Respiratory Disease Management, Chronic Disease Management, Cluster-randomized, DIVERT Scale, Home Care

### Strengths and limitations of this study

- The trial intervention addresses the growing and widespread need for better chronic disease management in the community.
- The pragmatic design will test real-world effectiveness with multi-provincial enrollment which will support generalization to other jurisdictions.
- The care model only addresses home care clients with cardio-respiratory symptoms.
- The care model is designed with general home care principles in mind but is specific to the Canadian environment.
- The care model is designed for longitudinal care environments rather than the short-term post-acute care settings.

### Licence Agreement

I, the Submitting Author has the right to grant and does grant on behalf of all authors of the Work, an exclusive licence and/or a non-exclusive licence for contributions from authors who are: i) UK Crown employees; ii) where BMJ has agreed a CC-BY licence shall apply, and/or iii) in accordance with the terms applicable for US Federal Government officers or employees acting as part of their official duties; on a worldwide, perpetual, irrevocable, royalty-free basis to BMJ Publishing Group Ltd (“BMJ”) its licensees and where the relevant Journal is co-owned by BMJ to the co-owners of the Journal, to publish the Work in BMJ Open and any other BMJ products and to exploit all rights, as set out in our licence.

## INTRODUCTION:

Publicly-funded home care services are delivered to at least 6% of Canadians age 65-74, 15% age 75-84 and 32% age 85 or older. [1] These home care clients are increasingly medically complex, often access care across multiple settings, have very high emergency department (ED) visitation rates, and have relatively poor access to effective chronic disease management.[2-4] Their frequent ED use is rarely aligned with chronic disease management or geriatric care principles and therefore creates excess cost burdens on the health care system.[5,6]

Effective chronic disease management models employ multiple components delivered by a coordinated multidisciplinary team.[7] According to the 'chronic disease management model', home care plays a complementary function to the care medical practitioners provide.[7] Clinical and self-care support, as well as case management are among the most effective components in chronic disease management.[8-10] Self-care education and support has been shown to improve health outcomes across chronic diseases.[11,12] The provision of sustained follow-up by nurses or non-medical staff can also be effective.[13,14]

Effective home care services have been limited by insufficient targeting of clients that are most at need or most likely to benefit.[15,16] We developed and validated a prognostic case-finding tool for home care clients known as the Detection of Indicators and Vulnerabilities of Emergency Room Trips (DIVERT) Scale that has been recommended for use in the provision of home care.[17-19] It can be derived in real time from the interRAI Home Care (RAI-HC) standardized home care assessment system used in 9 Canadian provinces as well as Estonia, Finland, Hong Kong, Iceland, Ireland, Italy, Japan, the Netherlands, New Zealand, Singapore, Spain, Switzerland, and 29 U.S. states. Cardio-respiratory symptoms and conditions are prominent predictive elements of the DIVERT Scale.

Canadian home care providers, historically focused on the delivery of personal support services, have started to develop supportive chronic disease management capacity (e.g., specialist nurse monitoring).[20] Most trials, however, exclude frail seniors and are not specific to home care, which leaves little evidence to inform chronic disease management practices.[17]

From evidence-based guidelines developed – in part – by our team, extensive client profiling, and input of clients/families as well as health professionals, we developed a person-centred, multi-component cardio-respiratory management model. Our approach is based on evidence of effective implementations in other fields,[21] and includes all elements for 'person-centred care'. [22] The pilot study was recognized on the 2015 Ontario Minister of Health and Long-Term Care's Medal Honour Roll for Excellence in Health Quality.[23,24]

Recent Canadian trials have tested a 'Virtual Ward' and a 'transitional care services' model in post-acute adult patients (the latter with heart failure) and found no benefit.[25,26] The 'Virtual Ward Model' cited difficulty of hospital teams to integrate with community-based care. Community-based chronic disease management can reduce hospital use.[25,27] Our study diverges from this given that we focus on home care clients who are frail and not specifically



1  
2  
3 'post-acute'. Also, our intervention leverages a validated case finding tool based on real-time  
4 inputs from community-based providers rather than care from hospital-based teams.  
5

6  
7 The DIVERT-CARE trial will adopt a pragmatic attitude to avoid the well-documented difficulty  
8 that many clinical trials have in producing results that are generalizable to real-world  
9 conditions.[28,29] As our interest is in the effects of the intervention under realistic rather than  
10 optimal conditions, the intervention will be delivered in usual care settings by usual care  
11 providers for usual clients. Home care caseloads will be randomized to intervention or control  
12 rather than individual clients in order to mimic the process that would occur when clinical  
13 practice changes. Cluster randomized designs are commonly utilized in pragmatic trials as  
14 practice changes are implemented at levels higher than the client in real-world  
15 conditions.[30,31] The DIVERT-CARE trial will also make use of secondary data sources for  
16 outcome measurement. The use of administrative data has been shown to be more accurate  
17 than client-reported results for health services utilization and permits excellent follow-up over  
18 long periods of time without the need for intrusive follow-up procedures.[32,33] A number of  
19 pragmatic, cluster-randomized trials using administrative data have appeared in the  
20 literature.[34–37]  
21  
22  
23  
24

25 This paper describes the protocol and presents the rationale for a cluster-randomized study  
26 investigating the effectiveness of a cardio-respiratory disease management model in a targeted  
27 home care client population. This paper complies with the SPIRIT 2013 recommendations for  
28 clinical trial protocol reporting.[38] This study will report trial findings in accordance with  
29 CONSORT guidelines.[39]  
30  
31

## 32 **METHODS AND ANALYSIS:**

### 33 **Study Population**

34 The trial will be conducted in partnership with three regional, public-sector, home care  
35 providers across Canada: Hamilton-Niagara-Haldimand-Brant Local Health Integration Network  
36 (HNHB LHIN) in Ontario, Western Health in Newfoundland, and Island Health in British  
37 Columbia. Each health care provider or site will select a number of home care caseloads to be  
38 included in the study based on historical practice patterns from each region including caseload  
39 size, home care enrollment, and assessment patterns. A caseload represents a group of clients  
40 in a small geographical area that is served by a home care coordinator (or 'case manager').  
41 Recruitment and randomization will occur at the level of the caseload and as such, clients were  
42 not involved in the research strategy. Each site will select enough caseloads to enroll  
43 approximately 360 long-stay home care clients, for a total of 1,100 clients over a 1.5-year time  
44 frame. We expect that over 43 distinct geographic home care caseloads will be enrolled in total.  
45  
46  
47  
48  
49

### 50 **Study Design**

51 The DIVERT-CARE trial is a pragmatic, cluster-randomized, two-arm parallel cluster, multi-  
52 center, superiority trial with a primary outcome of time to first ED visit within 6 months of the  
53 index home care clinical assessment. The unit of randomization/intervention will be the cluster  
54 (home care caseload; Figure 1: Caseload randomization schematic), while the unit of  
55 inference/measurement/analyses will be the home care client. The cluster-randomized design  
56  
57  
58  
59  
60

limits the potential for contamination and differential enrollment given that management and discretion over the use of resources is contained within each home care caseload. This design also supports the feasibility of the trial by reducing the number of resources (care providers) required to be trained in the intervention protocol. See Table 1 for an overview of the trial methods and design; Protocol Version 2.1 (2017-04-17).

**Figure 1: Caseload Randomization Schematic**

<see Figure 1 attachment.>

**Table 1: World Health Organization Trial Registration Data Set for DIVERT-CARE Trial (as of 11.03.2019; Protocol Version 2.1, 2017-04-17)**

| Data Category                                 | Information                                                                                                                                                                                                                                                                    |
|-----------------------------------------------|--------------------------------------------------------------------------------------------------------------------------------------------------------------------------------------------------------------------------------------------------------------------------------|
| Primary registry and trial identifying number | ClinicalTrials.gov<br>NCT03012256                                                                                                                                                                                                                                              |
| Date of registration in primary registry      | 6 January, 2017                                                                                                                                                                                                                                                                |
| Secondary identifying numbers                 |                                                                                                                                                                                                                                                                                |
| Source(s) of monetary or material support     | Canadian Institutes of Health Research (CIHR); Hamilton Niagara Haldimand Brant Community Local Health Integration Network (Hamilton, Ontario); Western Health (Corner Brook, Newfoundland and Labrador); Island Health (Victoria, British Columbia); Canadian Frailty Network |
| Primary sponsor                               | McMaster University                                                                                                                                                                                                                                                            |
| Secondary sponsor(s)                          | N/A                                                                                                                                                                                                                                                                            |
| Contact for public queries                    | Graham Campbell, MA [campbg4@mcmaster.ca]                                                                                                                                                                                                                                      |
| Contact for scientific queries                | Andrew Costa, PhD [acosta@mcmaster.ca]<br>McMaster University                                                                                                                                                                                                                  |
| Public title                                  | The DIVERT-CARE (Collaboration Action Research & Evaluation) Trial                                                                                                                                                                                                             |
| Scientific title                              | The DIVERT-CARE (Collaboration Action Research & Evaluation) Trial: A Multi Provincial Pragmatic Cluster Randomized Trial of Cardio-Respiratory Management in Home Care                                                                                                        |
| Countries of recruitment                      | Canada                                                                                                                                                                                                                                                                         |
| Health condition(s) or problem(s) studied     | Heart Failure; COPD                                                                                                                                                                                                                                                            |
| Intervention(s)                               | <b>Experimental:</b> Cardio-respiratory management model[44]<br><b>Control:</b> usual care / no intervention                                                                                                                                                                   |
| Key inclusion and exclusion criteria          | <b>Inclusion Criteria:</b><br><br>Long-stay home care clients living in a noninstitutional setting (i.e. admitted to home care and receive comprehensive clinical assessment (RAI-HC))                                                                                         |

|    |                         |                                                                  |
|----|-------------------------|------------------------------------------------------------------|
| 1  |                         |                                                                  |
| 2  |                         |                                                                  |
| 3  |                         | Clients with DIVERT score of 9, 10, 14, or 15 (i.e. at least one |
| 4  |                         | cardio-respiratory symptom [chest pain, dyspnea, dizziness,      |
| 5  |                         | irregular pulse]and at least one cardiac condition               |
| 6  |                         | [congestive heart failure or coronary artery disease])           |
| 7  |                         | <b>Exclusion Criteria:</b>                                       |
| 8  |                         | Clients receiving palliative care (i.e. Prognosis of less than   |
| 9  |                         | six months to live at time of assessment [Q. K8e from RAI-       |
| 10 |                         | HC])                                                             |
| 11 |                         | Clients receiving dialysis (Q. P2g from RAI-HC)                  |
| 12 |                         |                                                                  |
| 13 |                         |                                                                  |
| 14 | Study type              | Interventional                                                   |
| 15 |                         | Allocation: cluster randomized intervention model. Parallel      |
| 16 |                         | assignment, open label                                           |
| 17 |                         | Primary purpose: prevention                                      |
| 18 |                         | Pragmatic                                                        |
| 19 |                         |                                                                  |
| 20 | Date of first enrolment | 6 February, 2018                                                 |
| 21 | Target sample size      | 1080                                                             |
| 22 | Recruitment status      | Recruiting                                                       |
| 23 | Primary outcome(s)      | The difference in median days to first unplanned                 |
| 24 |                         | emergency department visit [Time Frame: Up to six months         |
| 25 |                         | from baseline]; The difference in total care costs controlling   |
| 26 |                         | for length of stay [Time Frame: Up to six months from            |
| 27 |                         | baseline]; Changes in patient activation (patient activation     |
| 28 |                         | questionnaire) [Time Frame: Baseline, 2 months, 4 months,        |
| 29 |                         | 6 months]; The difference in the number of symptoms              |
| 30 |                         | [Time Frame: Baseline, 2 months, 4 months, 6 months]             |
| 31 |                         |                                                                  |
| 32 |                         |                                                                  |
| 33 | Key secondary outcomes  | The difference in the number of unplanned emergency              |
| 34 |                         | department visits [Time Frame: Baseline, 6 months];              |
| 35 |                         | Description of health-related quality of life (quality of life   |
| 36 |                         | questionnaire) [Time Frame: 4 months]                            |
| 37 |                         |                                                                  |
| 38 |                         |                                                                  |

### Study Objectives

Our main objective is to evaluate the effectiveness and preliminary cost-effectiveness of a targeted, person-centered cardio-respiratory management model. The sample size for the primary outcome was calculated to determine whether the cardio-respiratory disease management model is superior to standard of care in postponing unplanned ED visits. Additional outcomes include determining if the cardio-respiratory disease management model is superior to standard of care in improving client activation, reducing symptoms, and the cost-effectiveness of this model. The symptoms of interest are shortness of breath, chest pain at rest or on exertion, dizziness, perceived pain control, edema, noticeable decrease in food/fluids consumed, and unintended weight loss.

Secondary objectives include determining if the cardio-respiratory disease management model is superior to standard of care for the number of unplanned ED visits, number of unplanned

1  
2  
3 hospital admissions, and change in health-related quality of life (HRQOL). HRQOL will be  
4 assessed by the Minimal Data Set Health Status Index (MDS-HSI), which is a RAI-HC derived  
5 measure based on the Health Utilities Index Mark 2.[40,41]  
6  
7

### 8 **Eligibility Criteria**

9 The pragmatic attitude of the trial warrants the broadest inclusion criteria that are feasible. To  
10 be eligible for inclusion into this trial, home care clients must possess the following  
11 characteristics:  
12

- 13 • Admitted to home care and receive comprehensive clinical assessment (RAI-HC) as part  
14 of regular home care enrolment, or reassessment;
- 15 • 19 years or older at time of assessment; and
- 16 • Categorized into DIVERT subgroups 9,10,14, or 15 (Figure 2: DIVERT Scale Target  
17 Groups). This includes:
  - 18 ○ those with cardio-respiratory symptoms (chest pain, dyspnea, dizziness, irregular  
19 pulse) who have a diagnosis of chronic cardiac disease and have not used an ED  
20 or hospital in the last 90 days (9, 10); OR
  - 21 ○ those with cardio-respiratory symptoms who have had one ED or hospital  
22 exposure in the last 90 days, regardless of if they are diagnosed with chronic  
23 cardiac disease (14, 15).

### 24 **Figure 2: DIVERT Scale Target Groups**

25 <see Figure 2 attachment.>  
26  
27

28 We will exclude clients with a prognosis of less than six months to live at time of assessment (Q.  
29 K8e from RAI-HC) and clients requiring dialysis treatment (Q. P2g from RAI-HC). The exclusion of  
30 palliative and dialysis care clients is necessary as some jurisdictions place these clients on  
31 specialized caseloads.  
32  
33

34 The eligibility criteria for the trial will result in a population that is representative of non-  
35 palliative home care clients in Canada who have cardio-respiratory symptoms and are expected  
36 to need on-going care.  
37  
38

### 39 **Recruitment and Consent**

40 All non-palliative, non-dialysis, adult home care clients in the trial caseloads assessed using the  
41 RAI-HC (during regular home care enrollment or reassessment) who fall into one of the four  
42 target DIVERT subgroups will be enrolled into the study by a care coordinator at the time of  
43 assessment. Eligible clients will automatically be included into the intervention or 'regular care'  
44 control groups on an intent-to-treat basis. Recruitment is expected to proceed over 6-9 months  
45 for each site. Analysis of the sample size simulations that were carried out on retrospective  
46 data from the HNHB LHIN region from November 2014 to June 2015 indicates an expected  
47 enrollment of 4 clients per caseload per month.  
48  
49

50 Each home care partners' process for attaining consent will apply to the trial. Individual  
51 informed consent will not be sought given that the cardio-respiratory management model is  
52 accepted, considered best practice care, and is offered – whole or in part – at the full clinical  
53  
54  
55  
56  
57  
58

1  
2  
3 discretion of the home care provider as per existing practice. Trial investigators have no part in  
4 the data collection, individual care decision-making, or record management during the study  
5 period beyond providing overall scientific guidance. We requested and received alteration to  
6 the requirements for consent based on satisfying the following Canadian Tri-Council Policy  
7 Statement: Ethical Conduct for Research Involving Humans (TCPS 2) criteria:[42]  
8  
9

- 10 1. The research involves no more than minimal risk to the participants.
- 11 2. The alteration to consent requirements is unlikely to adversely affect the welfare of
- 12 participants.
- 13 3. It is impossible or impracticable to carry out the research and to address the research
- 14 questions properly, given the research design, if the prior consent of participants is
- 15 required.
- 16 4. In the case of a proposed alteration, the precise nature and extent of any proposed
- 17 alteration is defined.
- 18 5. The plan to provide a debriefing (if any) which may offer participants the possibility of
- 19 refusing consent and/or withdrawing data and/or human biological materials, shall be in
- 20 accordance with Article 3.7B.
- 21
- 22
- 23
- 24

25 Our waiver of informed consent complies with existing methodological and ethical guidelines  
26 for pragmatic cluster-randomized trials. Existing guidelines state that informed consent by  
27 clients is not needed if “the intervention is to the clear advantage of every person in the cluster  
28 for the cluster to be entered in the trial”[43].  
29  
30

### 31 **Intervention**

32 Care planning and self-care support have been shown to be among the most effective elements  
33 of cardio-respiratory disease management[8,10] along with sustained follow-up by nurses or  
34 non-medical staff [13,14]. Care planning will be completed in a collaborative fashion amongst a  
35 care coordinator, the client, and the client’s caregivers (both formal and informal). Clients in the  
36 intervention group will have their care plans guided by a multi-component cardio-respiratory  
37 disease management model in addition to receiving their usual care.[44] This comprehensive  
38 model for the intervention has been described in greater detail in a previous publication.[44]  
39 The person-centered, multi-component cardio-respiratory management model was developed  
40 based on guidelines,[17,45,46] extensive home care client profiling, and input from  
41 clients/families and health professionals. The management model contains the following  
42 components (Table 2: Description of Intervention Components): scheduled nurse-led self-  
43 management support (based on a training program and tool-kit); access to a staffed helpline;  
44 education on vaccines; advance care and goal planning; clinical pharmacist medication  
45 reconciliation; team case rounds; situation, background, assessment, and recommendation  
46 (SBAR) communication protocol with primary care; and a standardized transition  
47 package.[21,44,47] Each component has a specific objective within the model, however the  
48 manner in which it is delivered may be adapted. For example, some home care providers have  
49 clinical pharmacists on staff whereas others would rely on collaboration with community  
50 pharmacists.  
51  
52  
53  
54  
55  
56  
57  
58  
59  
60

**Table 2: Description of intervention components**

| <b>DIVERT-CARE Intervention Components</b>                       | <b>Description</b>                                                                                                                               |
|------------------------------------------------------------------|--------------------------------------------------------------------------------------------------------------------------------------------------|
| <b>Case Finding Using the DIVERT Scale</b>                       | Use of the DIVERT Scale (embedded in interRAI assessment) to identify home care clients most likely to benefit.                                  |
| <b>Self-Management Education and Supports</b>                    | In-home assessment of self-management goals and needs, with practical education and skills training to recognize and manage symptoms.            |
| <b>Access to an immediate nurse-staffed helpline</b>             | Direct phone line staffed by nurses involved in the DIVERT-CARE Intervention to aid with self-management and problem resolution.                 |
| <b>Promotion of Vaccines</b>                                     | Seasonal flu vaccine and pneumococcal polysaccharide (Pneu-P-23) information and health promotion consistent with Canadian practice guidelines.  |
| <b>Advance Care and Goal Planning</b>                            | Consultation for advance care and goals of care planning, advanced care decisions, and communication of care wishes.                             |
| <b>Clinical Pharmacist-Led Medication Review</b>                 | Review of medication for safety, efficacy and appropriate use of medications and delivery options.                                               |
| <b>Interprofessional Team Case Rounds</b>                        | Weekly or biweekly care team meeting to discuss care plan, update goals, and how to support changing care needs.                                 |
| <b>SBAR Communication with Primary Care Providers</b>            | SBAR formatted communication to effectively communicate disease relevant information and care updates to primary and specialist care providers.  |
| <b>Standardized ED Transition Package / Personal Care Record</b> | A succinct document to support continuity of care throughout health system. Personal care record of goals, plan of care, and community supports. |

Self-management education and supports will be tailored to the needs and goals of the client. As with all home care services, clients may refuse all or any of the intervention components. The components will be delivered over 15 weeks by care coordinators and nurses who have been trained by the research team. Each component has a specific objective within the model, however, the manner in which it is delivered may be adapted by each trial partner according to their capacity and resources. Care coordinators and nurses will be provided detailed manuals explaining the components and their role in supporting clients throughout the intervention. The self-management program, based on previous pilot work[24], will use a population-based care approach pioneered by Wagner (1995) to help trial partners implement the cardio-respiratory disease management model.[48]

The intervention adheres to the following three principles: 1) multidisciplinary teams at each site will be trained on the protocols and resources related to each component of cardio-respiratory management model; 2) the teams will identify steps required to deliver the interventions; 3) the teams will plan deployment of the cardio-respiratory management model that engages clients, families, and caregivers to ensure that adequate resources are dedicated to support the interventions across the intervention caseloads, while ensuring long-term sustainability.

Clients in the control group will receive the usual set of home care services. No changes will be made to their care planning process. Depending on the jurisdiction and client needs, usual care may include personal support, nursing, physiotherapy, occupational therapy, and other services.

### Allocation

Caseloads were randomized to intervention or control, and stratified by home care provider (region) and sub-region (areas with similar economic status, access to care, and geography) at a 1:2 intervention to control ratio. The uneven allocation ratio increases the power of the trial while only minimally impacting operational and research resources.

An allocation sequence was created via random number generation in collaboration with the biostatistics unit at St. Joseph's Healthcare Hamilton. The sequence features a 1:2 allocation ratio with a block of size three. Caseloads from each region were sorted by sub-region and allocated using the sequence. In the event that the end of the clusters in a sub-region did not coincide with the end of a block, the rest of the block was skipped and allocation of the next sub-region started with a new block.

### Data Collection and Outcome Measures

The primary outcomes will be collected using secondary data over the six-month observation period (see Table 2: Routine Measurement). The use of routinely collected data for primary outcomes, cost, and health measures limits potential for bias from lack of blinding given that neither the care team nor the trial investigators are directly involved in the collection of outcomes. These records are accurate given that they are the basis for health care reporting systems and payments between public home care providers and contracted service providers.

**Table 2: Routine Measurement**

| Activity                                                   | Staff Member     | Approximate Time to Complete | Baseline | 2 Months | 4 Months | 6 Months |
|------------------------------------------------------------|------------------|------------------------------|----------|----------|----------|----------|
| Assess for eligibility (If intervention caseload) (RAI-HC) | Care coordinator | 5 minutes                    | X        |          |          |          |
| Symptoms (RAI-HC)                                          | Care coordinator | 15 minutes                   | X        | X        | X        | X        |

|                                                                   |                  |            |   |   |   |   |
|-------------------------------------------------------------------|------------------|------------|---|---|---|---|
| Health-related quality of life (RAI-HC)                           | Care coordinator | 30 minutes |   |   | X |   |
| Patient Activation Measure (PAM-13)                               | Care coordinator | 5 minutes  | X | X | X | X |
| Administrative service and billing records (CHRIS, HCC MRR, CRMS) | N/A              | N/A        | X | X | X | X |
| Emergency department and hospital records (NACRS, DAD)            | N/A              | N/A        | X | X | X | X |

**Legend:**

RAI-HC: Resident Assessment Instrument for Home Care (<https://www.cihi.ca/en/home-care>)

PAM-13: Patient Activation Measure (<https://www.insigniahealth.com/products/pam-survey>)

CHRIS: Client Health and Related Information System (<https://hssontario.ca/Who/Pages/protecting-your-privacy.aspx>)

HCC MRR: Home and Community Care Minimum Reporting Requirements (<https://www2.gov.bc.ca/assets/gov/health/forms/5502datadictionary.pdf>)

CRMS: Client and Referral Management System

([https://www.nlchi.nl.ca/images/ProvincialCRMS\\_Registration\\_User\\_Guide\\_v2\\_0\\_2017-09-01.pdf](https://www.nlchi.nl.ca/images/ProvincialCRMS_Registration_User_Guide_v2_0_2017-09-01.pdf))

NACRS: National Ambulatory Care Reporting System (<https://www.cihi.ca/en/national-ambulatory-care-reporting-system-metadata>)

DAD: Discharge Abstract Database (<https://www.cihi.ca/en/discharge-abstract-database-metadata>)

The main secondary data sets include the Resident Assessment Instrument for Home Care (RAI-HC), the Patient Activation Measure (PAM-13), the Client Health and Related Information System (CHRIS), the Home and Community Care Minimum Reporting Requirements (HCC MRR), the Client and Referral Management System (CRMS), the National Ambulatory Care Reporting System (NACRS), and the Discharge Abstract Database (DAD).

The RAI-HC is a standardized comprehensive assessment containing approximately 200 items and has been found to document major domains of health reliably.[49–53]

The Patient Activation Measure (PAM-13) indicates the client's progress through four stages as they become activated (i.e., they believe their role in their own care is important, they learn enough to develop confidence to act on their own belief, they actually act, and they reach the point where they can act even under stress).

The CHRIS is the health administrative database used by Ontario's publicly-funded home care providers. It includes client assessments, documents, provider and vendor contracts, billing of services information, and medical supplies and equipment rental costs.

The HCC MRR is an information management system defining a set of data elements that are reported to the British Columbia Ministry of Health by the regional health authorities. The HCC MRR captures information on clients, income, and home and community care services.



1  
2  
3  
4 The Client and Referral Management System (CRMS) is a health information system designed to  
5 support client and referral management for clients receiving community-based services from  
6 the regional health boards in Newfoundland. It contains information on client records and  
7 clinical activity.  
8  
9

10 The NACRS contains data from all national hospital-based and community-based ambulatory  
11 care. It is collected and maintained by the Canadian Institute for Health Information (CIHI),  
12 which conducts its own quality assurance procedures to ensure accuracy and completeness.  
13  
14

15 The DAD captures administrative, clinical, and demographic information nationally on hospital  
16 discharges (including deaths, sign-outs, and transfers). It is collected and maintained by CIHI,  
17 which conducts its own quality assurance procedures to ensure accuracy and completeness.  
18  
19

## 20 **Sample Size Calculations**

21  
22  
23 Sample size calculation assumptions:

- 24 • Primary outcome: Time to first unplanned ED visit within 6 months of baseline
- 25 • Hazard ratio of 0.75
- 26 • Mean size of a home care caseload: 120 clients
- 27 • Mean prevalence of DIVERT target group in each caseload: 30%
- 28 • Expected recruitment over 6 months per caseload: 30
- 29 • Mean cluster size: 30
- 30 • Allocation: 1:2 (intervention: control)
- 31  
32  
33

34 Simulations using retrospective secondary data sources were undertaken to explore the power  
35 of a hypothetical DIVERT-CARE trial conducted in the HNHB LHIN region of Ontario from  
36 December 2015 to June 2016. The simulations found that 36 HNHB home care caseloads  
37 randomized at a 1:2 intervention to control ratio could expect to enroll 1,100 clients across  
38 seven months. The simulation linked clients to their actual ED utilization records and extended  
39 the time to first ED visit figures for clients in 12 randomly selected intervention caseloads to  
40 achieve a hazard ratio of 0.75, a figure chosen to be more conservative than the pilot study but  
41 still clinically significant. The overall event rate was 35.5% in the intervention group and 44.8%  
42 in the control. The median time to first visit was 88 days in the intervention group and 75 days  
43 in the control. The power of the simulated DIVERT trial was 81.3% with a two-sided alpha of  
44 0.05. Simulations with a hazard ratio of 0.80 yielded a power of 60.1%. The intraclass  
45 correlation coefficient (ICC) was estimated to be 0.005.  
46  
47  
48  
49

50 Based on the simulations the target sample size for the trial will be 1,100 clients, which will  
51 yield an approximate power of 81% for a hazard ratio of 0.75 and 60% for a hazard ratio of 0.80.  
52  
53

## 54 **Statistical Analyses**

55  
56  
57  
58  
59  
60

1  
2  
3 Descriptive analyses will compare the treatment groups and sites on baseline demographic and  
4 clinical characteristics. Statistics on compliance, censoring, and follow-up times will also be  
5 presented.  
6  
7

8 The primary outcome will be assessed through a multi-level proportional hazards model. The  
9 dependent variable will be days until first unplanned ED visit, censored at date of home care  
10 discharge for any reason. Caseload and partner site will be included as nested random effects.  
11 Both unadjusted and adjusted results will be reported. For adjusted analysis, DIVERT subgroup,  
12 age, and sex will be included as time-independent fixed effects. The hazard ratio, 95%  
13 confidence interval, and p-value will be reported for the treatment group effect and covariates  
14 when applicable. A two-sided alpha level of 0.05 will be used to judge statistical significance.  
15  
16

17  
18 The assumption of proportionality of hazards across treatment groups will be evaluated by a  
19 visual inspection of the hazard curves and statistical testing of a time-dependent treatment  
20 group effect. If the hazard curves cross or the time-dependent treatment group effect is  
21 significant ( $p < 0.05$ ) then primary analysis will be modified to consider treatment group as a  
22 time-varying effect.  
23  
24

25 The economic evaluation will examine total care costs, controlling for length of stay, between  
26 treatment groups to compare incremental costs to incremental effects (i.e., cost per ED visit  
27 averted).  
28  
29

30 The other outcomes will be evaluated by multi-level generalized linear models. Four-month and  
31 six-month changes in PAM, HRQOL, number of symptoms, number of ED visits, and number of  
32 unplanned hospitalizations will be the respective dependent variables. Caseload and partner  
33 site will be included as nested random effects. Both unadjusted and adjusted results will be  
34 reported. For adjusted analysis DIVERT subgroup, age, and sex will be included as fixed effects.  
35 Unit change and rate ratios, with their associated 95% confidence interval and p-values, will be  
36 reported for the treatment group effect and covariates as applicable. A two-sided alpha level of  
37 0.05 will be used to judge statistical significance.  
38  
39  
40

41 Model assumptions will be evaluated by a visual inspection of residuals and the sensitivity of  
42 the results to the use of a heteroskedastic-robust variance estimator. If evidence of departure  
43 from model assumptions is present, then the analysis will be modified to utilize an empirical  
44 variance estimator.  
45  
46

### 47 **Patient and Public Involvement**

48 The intervention, comprehensively described elsewhere [44], was developed based on the  
49 input from clients/families and health professionals in a series of three in-person stakeholder  
50 meetings held in late 2013 and early 2014. The pilot of the study methodology was conducted  
51 in 2014 with the collaboration, input, and funding from a regional, public-sector, home care  
52 provider (HNHB LHIN). Participating clients and health professionals provided input into the  
53 intervention (and study design for health professionals) through telephone interviews using a  
54 structured questionnaire focused on the perceived benefit and utility of the interventions,  
55  
56  
57  
58  
59

1  
2  
3 overall satisfaction, and areas for improvement. The outcomes of the pilot study were featured  
4 in the home care providers annual report to the community.  
5  
6

7 The present protocol, based on the aforementioned pilot study, received input from health  
8 professionals in each participating region through a series of in-person planning meetings in  
9 mid-2017. The general public was engaged in one region through a local radio program.  
10 Adaptations and modifications to the intervention in each region to account for their unique  
11 health service context will be described in a forthcoming implementation publication. The  
12 experience of participating clients and health professionals will be investigated in a program  
13 evaluation and qualitative study to be conducted in parallel. The results of the trial are  
14 expected to be released to the study participants and public through regional public reports.  
15  
16  
17  
18

## 19 **ETHICS AND DISSEMINATION**

### 20 **Harm**

21 This trial is unlikely to cause additional risk of harm since the various components of the  
22 intervention are already available from home care agencies and service providers, though rarely  
23 offered in the standard care plan. Direct risks to the health of the client are minimal as none of  
24 the components of the intervention are novel interventions. Each element of the intervention  
25 has been shown to be safe individually. Clients in the control group will continue to receive  
26 their usual care, while clients in the intervention group will receive usual care plus increased  
27 access to additional home care services defined by the cardio-respiratory treatment model.  
28  
29  
30

### 31 **Ethical approval**

32 We have received ethics approval from the Hamilton-Integrated Research Ethics Board, Health  
33 Research Ethics Authority for Western Health, and the Clinical Research Ethics Board for  
34 Vancouver Island.  
35  
36

### 37 **Results dissemination**

38 We aim to make the results of this study public through peer-reviewed publications, clinical  
39 trial registry, thesis manuscripts, conference publications, and notifications to our trial partners,  
40 who will include the findings in their regular newsletters and annual reports to clients, partners,  
41 and government.  
42  
43  
44

## 45 **DISCUSSION**

46 In summary, this pragmatic, cluster-randomized, multi-center superiority trial will investigate  
47 the effectiveness of a cardio-respiratory disease management model in a targeted home care  
48 client population, with case finding occurring using the DIVERT scale[19]. By offering a person-  
49 centered, multi-component cardio-respiratory management model to home care clients at the  
50 highest levels of risk,[44] we hope to determine if unplanned ED visits are postponed, clients  
51 have increased activation in their care, symptoms are reduced, and that the care model is cost-  
52 effective.  
53  
54  
55  
56  
57  
58  
59  
60

1  
2  
3 This pragmatic trial will inform how multi-component cardio-respiratory care interventions are  
4 received as they are delivered in real-world conditions. Historically, trials investigating  
5 community programs have excluded frail seniors who would be at high-risk of ED services.  
6 Additionally, other trials have tended to focus on post-acute care and have not targeted high-  
7 risk clients when assessing community-based chronic disease management interventions.  
8  
9

10 The need for appropriate and targeted supportive chronic disease management is a clear and  
11 compelling health services issue, and is reflected in new provincial government investments  
12 into the sector. This trial will be an important precedent around the creation of more upstream  
13 approaches to care for home-care clients that help to take further pressure of hospitals and EDs  
14 that are already facing issues of overcrowding across Canada.  
15  
16  
17  
18  
19  
20  
21  
22  
23  
24  
25  
26  
27  
28  
29  
30  
31  
32  
33  
34  
35  
36  
37  
38  
39  
40  
41  
42  
43  
44  
45  
46  
47  
48  
49  
50  
51  
52  
53  
54  
55  
56  
57  
58  
59  
60

### Author Contributions

APC is the principal investigator and led the conceptualization and design of the protocol, drafted, and revised the manuscript. CS, AJ, DD, and GC made contributions to the design and implementation of the study, and supported the manuscript. GA, CB, VB, SB, DF, PH, GH, JH, LL, RM, LM, and SS are co-investigators that contributed to the design of the study, and revised the manuscript. JD, TP, JR, RG, DM, and DH are trial partners who contributed to the design and implementation of the study. All authors critically revised the manuscript and approved the final version of this manuscript.

### Competing interests

It should be noted that DHF has a proprietary interest in Health Utilities Incorporated, Dundas, Ontario, Canada. HUInc distributes copyrighted Health Utilities Index (HUI) materials and provides methodological advice on the use of the HUI. All others author have no competing interests.

### Funding statement

Andrew Costa is supported by the Schlegel Chair in Clinical Epidemiology & Aging, McMaster University. This work was supported by Canadian Institutes of Health Research (CIHR) grant number 148933 and pilot funding from the Canadian Frailty Network (CFN) grant number 2015-15PB. This funding source has no role in the design of the study and will not have a role in its execution, analyses, interpretation of data, or decision to submit results.

### Acknowledgements

The authors wish to thank the regional home care providers for their leadership and involvement in the study: Hamilton-Niagara-Haldimand-Brant Local Health Integration Network (HNHB LHIN) in Ontario, Western Health in Newfoundland, and Island Health in British Columbia.

## REFERENCES

- 1 Wilkins K. Government-subsidized Home Care. Ottawa, ON: : Statistics Canada 2006. <https://www.ncbi.nlm.nih.gov/pubmed/17111593> (accessed 22 Aug 2018).
- 2 Seggewiss K. Variations in home care programs across Canada demonstrate need for national standards and pan-Canadian program. *CMAJ* 2009;**180**:E90–2. doi:10.1503/cmaj.090819
- 3 Health Council of Canada. Seniors in need, caregivers in distress: What are home care priorities for seniors in Canada? 2012. [http://www.carp.ca/wp-content/uploads/2012/04/HCC\\_HomeCare\\_2d.pdf](http://www.carp.ca/wp-content/uploads/2012/04/HCC_HomeCare_2d.pdf) (accessed 24 May 2018).
- 4 Jones A, Schumacher C, Bronskill SE, *et al*. The association between home care visits and same-day emergency department use: a case-crossover study. *Can Med Assoc J* 2018;**190**:E525–31. doi:10.1503/cmaj.170892
- 5 Gray LC, Peel NM, Costa AP, *et al*. Profiles of Older Patients in the Emergency Department: Findings From the interRAI Multinational Emergency Department Study. *Ann Emerg Med* 2013;**62**:467–74. doi:10.1016/j.annemergmed.2013.05.008
- 6 Salvi F, Morichi V, Grilli A, *et al*. The elderly in the emergency department: a critical review of problems and solutions. *Intern Emerg Med* 2007;**2**:292–301. doi:10.1007/s11739-007-0081-3
- 7 Wagner EH, Davis C, Schaefer J, *et al*. A Survey of Leading Chronic Disease Management Programs: Are They Consistent with the Literature?: *Manag Care Q* 1999;**7**:56–66.
- 8 Wagner EH. Chronic disease management: what will it take to improve care for chronic illness? *Eff Clin Pract* 1998;**1**:2–4.
- 9 Wagner EH. More than a case manager. *Ann Intern Med* 1998;**129**:654–6.
- 10 Becker DM, Raqueño JV, Yook RM, *et al*. Nurse-mediated cholesterol management compared with enhanced primary care in siblings of individuals with premature coronary disease. *Arch Intern Med* 1998;**158**:1533–9.
- 11 Aubert RE, Herman WH, Waters J, *et al*. Nurse case management to improve glycemic control in diabetic patients in a health maintenance organization. A randomized, controlled trial. *Ann Intern Med* 1998;**129**:605–12.
- 12 Von Korff M, Gruman J, Schaefer J, *et al*. Collaborative management of chronic illness. *Ann Intern Med* 1997;**127**:1097–102.

- 13 Weinberger M, Oddone EZ, Henderson WG. Does increased access to primary care reduce hospital readmissions? Veterans Affairs Cooperative Study Group on Primary Care and Hospital Readmission. *N Engl J Med* 1996;**334**:1441–7. doi:10.1056/NEJM199605303342206
- 14 Wasson J, Gaudette C, Whaley F, *et al*. Telephone care as a substitute for routine clinic follow-up. *JAMA* 1992;**267**:1788–93.
- 15 Mukamel DB, Chou CC, Zimmer JG, *et al*. The effect of accurate patient screening on the cost-effectiveness of case management programs. *The Gerontologist* 1997;**37**:777–84.
- 16 Stuck AE, Elkuch P, Dapp U, *et al*. Feasibility and yield of a self-administered questionnaire for health risk appraisal in older people in three European countries. *Age Ageing* 2002;**31**:463–7.
- 17 Cardiac Care Network of Ontario. Strategy for Community Management of Heart Failure in Ontario. 2014.
- 18 Health Quality Ontario. Key Observations: 2014-15 Quality Improvement Plans Community Care Access Centres. Toronto, ON: : Queen’s Printer for Ontario 2014.
- 19 Costa A, Hirdes JP, Bell CM, *et al*. Derivation and Validation of the Detection of Indicators and Vulnerabilities for Emergency Room Trips Scale for Classifying the Risk of Emergency Department Use in Frail Community-Dwelling Older Adults. *J Am Geriatr Soc* 2015;**63**:763–9. doi:10.1111/jgs.13336
- 20 Tsisis P. Chronic disease management and the home-care alternative in Ontario, Canada. *Health Serv Manage Res* 2009;**22**:136–9. doi:10.1258/hsmr.2009.009002
- 21 Grimshaw JM, Shirran L, Thomas R, *et al*. Changing provider behavior: an overview of systematic reviews of interventions. *Med Care* 2001;**39**:II2-45.
- 22 American Geriatrics Society Expert Panel on Person-Centered Care. Person-Centered Care: A Definition and Essential Elements. *J Am Geriatr Soc* 2016;**64**:15–8. doi:10.1111/jgs.13866
- 23 Ministry of Health and Long-Term Care. 2015 Minister’s Medal Winners. 2016.[http://www.health.gov.on.ca/en/pro/programs/transformation/minister\\_medal\\_2015.aspx](http://www.health.gov.on.ca/en/pro/programs/transformation/minister_medal_2015.aspx) (accessed 18 Feb 2018).
- 24 Costa A, Haughton D, Heckman G, *et al*. The DIVERT-CARE catalyst trial: Targeted chronic-disease management for home care clients. *Innov Aging* 2017;**1**:322–3. doi:10.1093/geroni/igx004.1190
- 25 Dhalla IA, O’Brien T, Morra D, *et al*. Effect of a postdischarge virtual ward on readmission or death for high-risk patients: a randomized clinical trial. *JAMA* 2014;**312**:1305–12. doi:10.1001/jama.2014.11492

- 1  
2  
3 26 Van Spall HGC, Lee SF, Xie F, *et al.* Effect of Patient-Centered Transitional Care Services on  
4 Clinical Outcomes in Patients Hospitalized for Heart Failure: The PACT-HF Randomized  
5 Clinical Trial. *J Am Med Assoc* 2019;**321**:753–61. doi:10.1001/jama.2019.0710  
6  
7  
8 27 Beswick AD, Rees K, Dieppe P, *et al.* Complex interventions to improve physical function and  
9 maintain independent living in elderly people: a systematic review and meta-analysis.  
10 *Lancet* 2008;**371**:725–35. doi:10.1016/S0140-6736(08)60342-6  
11  
12 28 Schwartz D, Lellouch J. Explanatory and pragmatic attitudes in therapeutical trials. *J Clin*  
13 *Epidemiol* 2009;**62**:499–505. doi:10.1016/j.jclinepi.2009.01.012  
14  
15  
16 29 Rothwell PM. External validity of randomised controlled trials: “to whom do the results of  
17 this trial apply?” *Lancet Lond Engl* 2005;**365**:82–93. doi:10.1016/S0140-6736(04)17670-8  
18  
19  
20 30 Dickinson LM, Beaty B, Fox C, *et al.* Pragmatic Cluster Randomized Trials Using Covariate  
21 Constrained Randomization: A Method for Practice-based Research Networks (PBRNs). *J Am*  
22 *Board Fam Med* 2015;**28**:663–72. doi:10.3122/jabfm.2015.05.150001  
23  
24 31 Hemming K, Haines TP, Chilton PJ, *et al.* The stepped wedge cluster randomised trial:  
25 rationale, design, analysis, and reporting. *BMJ* 2015;**350**:h391.  
26  
27  
28 32 Anderson GL, Burns CJ, Larsen J, *et al.* Use of administrative data to increase the practicality  
29 of clinical trials: Insights from the Women’s Health Initiative. *Clin Trials* 2016;**13**:519–26.  
30 doi:10.1177/1740774516656579  
31  
32 33 Richards SH, Coast J, Peters TJ. Patient-reported use of health service resources compared  
33 with information from health providers. *Health Soc Care Community* 2003;**11**:510–8.  
34  
35  
36 34 Richard E, Van den Heuvel E, Moll van Charante EP, *et al.* Prevention of dementia by  
37 intensive vascular care (PreDIVA): a cluster-randomized trial in progress. *Alzheimer Dis*  
38 *Assoc Disord* 2009;**23**:198–204. doi:10.1097/WAD.0b013e31819783a4  
39  
40  
41 35 Kaczorowski J, Chambers LW, Dolovich L, *et al.* Improving cardiovascular health at  
42 population level: 39 community cluster randomised trial of Cardiovascular Health  
43 Awareness Program (CHAP). *BMJ* 2011;**342**:d442.  
44  
45  
46 36 Steventon A, Bardsley M, Billings J, *et al.* Effect of telehealth on use of secondary care and  
47 mortality: findings from the Whole System Demonstrator cluster randomised trial. *BMJ*  
48 2012;**344**:e3874.  
49  
50  
51 37 Evans CD, Eurich DT, Taylor JG, *et al.* A pragmatic cluster randomized trial evaluating the  
52 impact of a community pharmacy intervention on statin adherence: rationale and design of  
53 the Community Pharmacy Assisting in Total Cardiovascular Health (CPATCH) study. *Trials*  
54 2010;**11**:76. doi:10.1186/1745-6215-11-76  
55  
56  
57  
58  
59



- 1  
2  
3 38 Chan A-W, Tetzlaff JM, Altman DG, *et al.* SPIRIT 2013 Statement: Defining Standard Protocol  
4 Items for Clinical Trials. *Ann Intern Med* 2013;**158**:200. doi:10.7326/0003-4819-158-3-  
5 201302050-00583  
6  
7  
8 39 Schulz KF, Altman DG, Moher D, *et al.* CONSORT 2010 Statement: updated guidelines for  
9 reporting parallel group randomised trials. *Trials* 2010;**11**:32. doi:10.1186/1745-6215-11-32  
10  
11 40 Wodchis WP, Hirdes JP, Feeny DH. Health-related quality of life measure based on the  
12 minimum data set. *Int J Technol Assess Health Care* 2003;**19**:490–506.  
13  
14 41 Jones A, Feeny D, Costa AP. Longitudinal construct validity of the minimum data set health  
15 status index. *Health Qual Life Outcomes* 2018;**16**:102. doi:10.1186/s12955-018-0932-9  
16  
17 42 Canadian Institutes of Health Research, Natural Sciences and Engineering Research Council  
18 of Canada, Social Sciences and Humanities Research Council of Canada. Tri-council policy  
19 statement: Ethical conduct for research involving humans 2014. 2014.  
20 [http://www.pre.ethics.gc.ca/pdf/eng/tcps2-2014/TCPS\\_2\\_FINAL\\_Web.pdf](http://www.pre.ethics.gc.ca/pdf/eng/tcps2-2014/TCPS_2_FINAL_Web.pdf)  
21  
22 43 Medical Research Council. Cluster randomised trials: Methodological and ethical  
23 considerations. London: : Medical Research Council 2002.  
24  
25 44 Schumacher C, Lackey C, Haughton D, *et al.* A chronic disease management model for home  
26 care patients with cardio-respiratory symptoms: the DIVERT-CARE Intervention. *Can J*  
27 *Cardiovasc Nurs* 2018;**28**:18–26.  
28  
29 45 Howlett JG, Chan M, Ezekowitz JA, *et al.* The Canadian Cardiovascular Society Heart Failure  
30 Companion: Bridging Guidelines to Your Practice. *Can J Cardiol* 2016;**32**:296–310.  
31 doi:10.1016/j.cjca.2015.06.019  
32  
33 46 O'Donnell DE, Hernandez P, Kaplan A, *et al.* Canadian Thoracic Society recommendations  
34 for management of chronic obstructive pulmonary disease - 2008 update - highlights for  
35 primary care. *Can Respir J* 2008;**15 Suppl A**:1A-8A. doi:10.1155/2008/641965  
36  
37 47 Beckett CD, Kipnis G. Collaborative communication: integrating SBAR to improve  
38 quality/patient safety outcomes. *J Healthc Qual* 2009;**31**:19–28.  
39  
40 48 Wagner EH. Population-based management of diabetes care. *Patient Educ Couns*  
41 1995;**26**:225–30.  
42  
43 49 Morris JN, Fries BE, Steel K, *et al.* Comprehensive Clinical Assessment in Community Setting:  
44 Applicability of the MDS-HC. *J Am Geriatr Soc* 1997;**45**:1017–24. doi:10.1111/j.1532-  
45 5415.1997.tb02975.x  
46  
47 50 Kwan C-W, Chi I, Lam T-P, *et al.* Validation of Minimum Data Set for Home Care Assessment  
48 Instrument (MDS-HC) for Hong Kong Chinese Elders. *Clin Gerontol* 2000;**21**:35–48.  
49 doi:10.1300/J018v21n04\_04  
50  
51  
52  
53  
54  
55  
56  
57  
58  
59

- 1  
2  
3 51 Leung AC, Liu CP, Tsui LL, *et al.* The use of the Minimum Data Set. Home Care in a case  
4 management project in Hong Kong. *Care Manag J* 2001;**3**:8–13.  
5  
6  
7 52 Landi F, Tua E, Onder G, *et al.* Minimum Data Set for Home Care: A Valid Instrument to  
8 Assess Frail Older People Living in the Community. *Med Care* 2000;**38**:1184–90.  
9  
10 53 Hirdes JP, Ljunggren G, Morris JN, *et al.* Reliability of the interRAI suite of assessment  
11 instruments: a 12-country study of an integrated health information system. *BMC Health*  
12 *Serv Res* 2008;**8**:277. doi:10.1186/1472-6963-8-277  
13  
14  
15  
16  
17  
18  
19  
20  
21  
22  
23  
24  
25  
26  
27  
28  
29  
30  
31  
32  
33  
34  
35  
36  
37  
38  
39  
40  
41  
42  
43  
44  
45  
46  
47  
48  
49  
50  
51  
52  
53  
54  
55  
56  
57  
58  
59  
60

1  
2  
3  
4  
5  
6  
7  
8  
9  
10  
11  
12  
13  
14  
15  
16  
17  
18  
19  
20  
21  
22  
23  
24  
25  
26  
27  
28  
29  
30  
31  
32  
33  
34  
35  
36  
37  
38  
39  
40  
41  
42  
43  
44  
45  
46  
47  
48  
49  
50  
51  
52  
53  
54  
55  
56  
57  
58  
59  
60

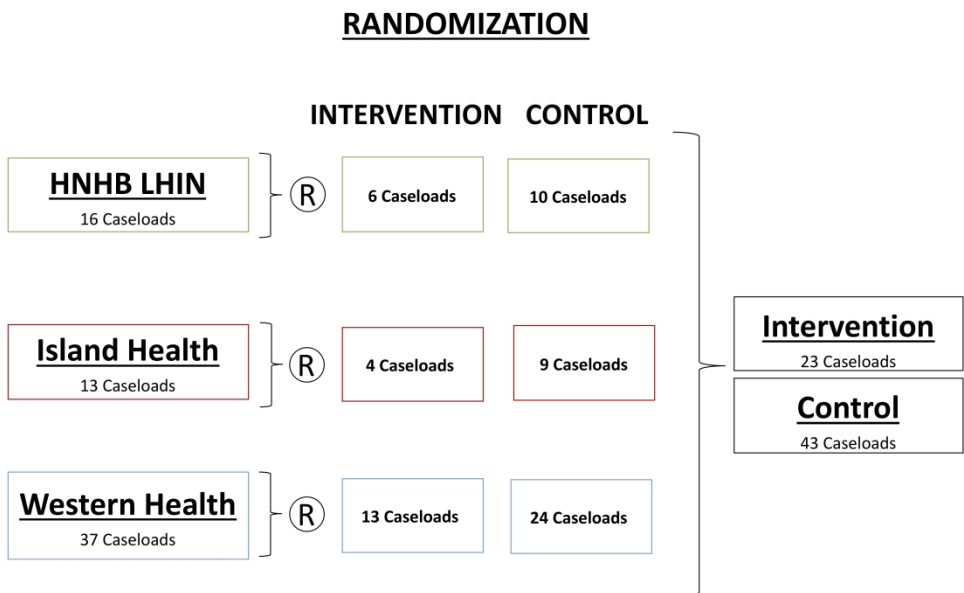

Figure 1: Caseload Randomization Schematic

368x222mm (300 x 300 DPI)



# Reporting checklist for protocol of a clinical trial.

Based on the SPIRIT guidelines.

## Instructions to authors

Complete this checklist by entering the page numbers from your manuscript where readers will find each of the items listed below.

Your article may not currently address all the items on the checklist. Please modify your text to include the missing information. If you are certain that an item does not apply, please write "n/a" and provide a short explanation.

Upload your completed checklist as an extra file when you submit to a journal.

In your methods section, say that you used the SPIRIT reporting guidelines, and cite them as:

Chan A-W, Tetzlaff JM, Altman DG, Laupacis A, Gøtzsche PC, Krleža-Jerić K, Hróbjartsson A, Mann H, Dickersin K, Berlin J, Doré C, Parulekar W, Summerskill W, Groves T, Schulz K, Sox H, Rockhold FW, Rennie D, Moher D. SPIRIT 2013 Statement: Defining standard protocol items for clinical trials. *Ann Intern Med.* 2013;158(3):200-207

|                                             |     | Reporting Item                                                                                               | Page Number |
|---------------------------------------------|-----|--------------------------------------------------------------------------------------------------------------|-------------|
| Title                                       | #1  | Descriptive title identifying the study design, population, interventions, and, if applicable, trial acronym | 1           |
| Trial registration                          | #2a | Trial identifier and registry name. If not yet registered, name of intended registry                         | 3           |
| Trial registration: data set                | #2b | All items from the World Health Organization Trial Registration Data Set                                     | 7-8         |
| Protocol version                            | #3  | Date and version identifier                                                                                  | 7           |
| Funding                                     | #4  | Sources and types of financial, material, and other support                                                  | 17          |
| Roles and responsibilities: contributorship | #5a | Names, affiliations, and roles of protocol contributors                                                      | 17          |
| Roles and responsibilities:                 | #5b | Name and contact information for the trial sponsor                                                           | 17          |

|    |                      |      |                                                                          |    |
|----|----------------------|------|--------------------------------------------------------------------------|----|
| 1  | sponsor contact      |      |                                                                          |    |
| 2  | information          |      |                                                                          |    |
| 3  |                      |      |                                                                          |    |
| 4  | Roles and            | #5c  | Role of study sponsor and funders, if any, in study design;              | 17 |
| 5  | responsibilities:    |      | collection, management, analysis, and interpretation of data; writing    |    |
| 6  | sponsor and funder   |      | of the report; and the decision to submit the report for publication,    |    |
| 7  |                      |      | including whether they will have ultimate authority over any of these    |    |
| 8  |                      |      | activities                                                               |    |
| 9  |                      |      |                                                                          |    |
| 10 |                      |      |                                                                          |    |
| 11 |                      |      |                                                                          |    |
| 12 | Roles and            | #5d  | Composition, roles, and responsibilities of the coordinating centre,     | 17 |
| 13 | responsibilities:    |      | steering committee, endpoint adjudication committee, data                |    |
| 14 | committees           |      | management team, and other individuals or groups overseeing the          |    |
| 15 |                      |      | trial, if applicable (see Item 21a for data monitoring committee)        |    |
| 16 |                      |      |                                                                          |    |
| 17 |                      |      |                                                                          |    |
| 18 |                      |      |                                                                          |    |
| 19 | Background and       | #6a  | Description of research question and justification for undertaking the   | 5  |
| 20 | rationale            |      | trial, including summary of relevant studies (published and              |    |
| 21 |                      |      | unpublished) examining benefits and harms for each intervention          |    |
| 22 |                      |      |                                                                          |    |
| 23 |                      |      |                                                                          |    |
| 24 | Background and       | #6b  | Explanation for choice of comparators                                    | 9  |
| 25 | rationale: choice of |      |                                                                          |    |
| 26 | comparators          |      |                                                                          |    |
| 27 |                      |      |                                                                          |    |
| 28 |                      |      |                                                                          |    |
| 29 | Objectives           | #7   | Specific objectives or hypotheses                                        | 8  |
| 30 |                      |      |                                                                          |    |
| 31 |                      |      |                                                                          |    |
| 32 | Trial design         | #8   | Description of trial design including type of trial (eg, parallel group, | 6  |
| 33 |                      |      | crossover, factorial, single group), allocation ratio, and framework     |    |
| 34 |                      |      | (eg, superiority, equivalence, non-inferiority, exploratory)             |    |
| 35 |                      |      |                                                                          |    |
| 36 |                      |      |                                                                          |    |
| 37 | Study setting        | #9   | Description of study settings (eg, community clinic, academic            | 6  |
| 38 |                      |      | hospital) and list of countries where data will be collected. Reference  |    |
| 39 |                      |      | to where list of study sites can be obtained                             |    |
| 40 |                      |      |                                                                          |    |
| 41 |                      |      |                                                                          |    |
| 42 | Eligibility criteria | #10  | Inclusion and exclusion criteria for participants. If applicable,        | 9  |
| 43 |                      |      | eligibility criteria for study centres and individuals who will perform  |    |
| 44 |                      |      | the interventions (eg, surgeons, psychotherapists)                       |    |
| 45 |                      |      |                                                                          |    |
| 46 |                      |      |                                                                          |    |
| 47 |                      |      |                                                                          |    |
| 48 | Interventions:       | #11a | Interventions for each group with sufficient detail to allow             | 10 |
| 49 | description          |      | replication, including how and when they will be administered            |    |
| 50 |                      |      |                                                                          |    |
| 51 |                      |      |                                                                          |    |
| 52 | Interventions:       | #11b | Criteria for discontinuing or modifying allocated interventions for a    | 10 |
| 53 | modifications        |      | given trial participant (eg, drug dose change in response to harms,      |    |
| 54 |                      |      | participant request, or improving / worsening disease)                   |    |
| 55 |                      |      |                                                                          |    |
| 56 |                      |      |                                                                          |    |
| 57 | Interventions:       | #11c | Strategies to improve adherence to intervention protocols, and any       | 11 |
| 58 | adherence            |      | procedures for monitoring adherence (eg, drug tablet return;             |    |
| 59 |                      |      |                                                                          |    |
| 60 |                      |      |                                                                          |    |

|    |                      |                   |                                                                        |
|----|----------------------|-------------------|------------------------------------------------------------------------|
|    |                      | laboratory tests) |                                                                        |
| 1  |                      |                   |                                                                        |
| 2  |                      |                   |                                                                        |
| 3  | Interventions:       | #11d              | Relevant concomitant care and interventions that are permitted or      |
| 4  | concomitant care     |                   | prohibited during the trial                                            |
| 5  |                      |                   |                                                                        |
| 6  | Outcomes             | #12               | Primary, secondary, and other outcomes, including the specific         |
| 7  |                      |                   | measurement variable (eg, systolic blood pressure), analysis metric    |
| 8  |                      |                   | (eg, change from baseline, final value, time to event), method of      |
| 9  |                      |                   | aggregation (eg, median, proportion), and time point for each          |
| 10 |                      |                   | outcome. Explanation of the clinical relevance of chosen efficacy      |
| 11 |                      |                   | and harm outcomes is strongly recommended                              |
| 12 |                      |                   |                                                                        |
| 13 |                      |                   |                                                                        |
| 14 |                      |                   |                                                                        |
| 15 |                      |                   |                                                                        |
| 16 | Participant timeline | #13               | Time schedule of enrolment, interventions (including any run-ins       |
| 17 |                      |                   | and washouts), assessments, and visits for participants. A schematic   |
| 18 |                      |                   | diagram is highly recommended (see Figure)                             |
| 19 |                      |                   |                                                                        |
| 20 |                      |                   |                                                                        |
| 21 | Sample size          | #14               | Estimated number of participants needed to achieve study objectives    |
| 22 |                      |                   | and how it was determined, including clinical and statistical          |
| 23 |                      |                   | assumptions supporting any sample size calculations                    |
| 24 |                      |                   |                                                                        |
| 25 |                      |                   |                                                                        |
| 26 | Recruitment          | #15               | Strategies for achieving adequate participant enrolment to reach       |
| 27 |                      |                   | target sample size                                                     |
| 28 |                      |                   |                                                                        |
| 29 |                      |                   |                                                                        |
| 30 | Allocation: sequence | #16a              | Method of generating the allocation sequence (eg, computer-            |
| 31 | generation           |                   | generated random numbers), and list of any factors for stratification. |
| 32 |                      |                   | To reduce predictability of a random sequence, details of any          |
| 33 |                      |                   | planned restriction (eg, blocking) should be provided in a separate    |
| 34 |                      |                   | document that is unavailable to those who enrol participants or        |
| 35 |                      |                   | assign interventions                                                   |
| 36 |                      |                   |                                                                        |
| 37 |                      |                   |                                                                        |
| 38 |                      |                   |                                                                        |
| 39 |                      |                   |                                                                        |
| 40 | Allocation           | #16b              | Mechanism of implementing the allocation sequence (eg, central         |
| 41 | concealment          |                   | telephone; sequentially numbered, opaque, sealed envelopes),           |
| 42 | mechanism            |                   | describing any steps to conceal the sequence until interventions are   |
| 43 |                      |                   | assigned                                                               |
| 44 |                      |                   |                                                                        |
| 45 |                      |                   |                                                                        |
| 46 |                      |                   |                                                                        |
| 47 | Allocation:          | #16c              | Who will generate the allocation sequence, who will enrol              |
| 48 | implementation       |                   | participants, and who will assign participants to interventions        |
| 49 |                      |                   |                                                                        |
| 50 |                      |                   |                                                                        |
| 51 | Blinding (masking)   | #17a              | Who will be blinded after assignment to interventions (eg, trial       |
| 52 |                      |                   | participants, care providers, outcome assessors, data analysts), and   |
| 53 |                      |                   | how                                                                    |
| 54 |                      |                   |                                                                        |
| 55 |                      |                   |                                                                        |
| 56 | Blinding (masking):  | #17b              | If blinded, circumstances under which unblinding is permissible, and   |
| 57 | emergency            |                   | procedure for revealing a participant's allocated intervention during  |
| 58 |                      |                   |                                                                        |
| 59 |                      |                   |                                                                        |
| 60 |                      |                   |                                                                        |

|    |                        |      |                                                                         |    |
|----|------------------------|------|-------------------------------------------------------------------------|----|
| 1  | unblinding             |      | the trial                                                               |    |
| 2  |                        |      |                                                                         |    |
| 3  | Data collection plan   | #18a | Plans for assessment and collection of outcome, baseline, and other     | 13 |
| 4  |                        |      | trial data, including any related processes to promote data quality     |    |
| 5  |                        |      | (eg, duplicate measurements, training of assessors) and a description   |    |
| 6  |                        |      | of study instruments (eg, questionnaires, laboratory tests) along with  |    |
| 7  |                        |      | their reliability and validity, if known. Reference to where data       |    |
| 8  |                        |      | collection forms can be found, if not in the protocol                   |    |
| 9  |                        |      |                                                                         |    |
| 10 |                        |      |                                                                         |    |
| 11 |                        |      |                                                                         |    |
| 12 | Data collection plan:  | #18b | Plans to promote participant retention and complete follow-up,          | 13 |
| 13 | retention              |      | including list of any outcome data to be collected for participants     |    |
| 14 |                        |      | who discontinue or deviate from intervention protocols                  |    |
| 15 |                        |      |                                                                         |    |
| 16 |                        |      |                                                                         |    |
| 17 | Data management        | #19  | Plans for data entry, coding, security, and storage, including any      | 13 |
| 18 |                        |      | related processes to promote data quality (eg, double data entry;       |    |
| 19 |                        |      | range checks for data values). Reference to where details of data       |    |
| 20 |                        |      | management procedures can be found, if not in the protocol              |    |
| 21 |                        |      |                                                                         |    |
| 22 |                        |      |                                                                         |    |
| 23 |                        |      |                                                                         |    |
| 24 | Statistics: outcomes   | #20a | Statistical methods for analysing primary and secondary outcomes.       | 14 |
| 25 |                        |      | Reference to where other details of the statistical analysis plan can   |    |
| 26 |                        |      | be found, if not in the protocol                                        |    |
| 27 |                        |      |                                                                         |    |
| 28 |                        |      |                                                                         |    |
| 29 |                        |      |                                                                         |    |
| 30 | Statistics: additional | #20b | Methods for any additional analyses (eg, subgroup and adjusted          | 14 |
| 31 | analyses               |      | analyses)                                                               |    |
| 32 |                        |      |                                                                         |    |
| 33 |                        |      |                                                                         |    |
| 34 | Statistics: analysis   | #20c | Definition of analysis population relating to protocol non-adherence    | 14 |
| 35 | population and         |      | (eg, as randomised analysis), and any statistical methods to handle     |    |
| 36 | missing data           |      | missing data (eg, multiple imputation)                                  |    |
| 37 |                        |      |                                                                         |    |
| 38 |                        |      |                                                                         |    |
| 39 | Data monitoring:       | #21a | Composition of data monitoring committee (DMC); summary of its          | 15 |
| 40 | formal committee       |      | role and reporting structure; statement of whether it is independent    |    |
| 41 |                        |      | from the sponsor and competing interests; and reference to where        |    |
| 42 |                        |      | further details about its charter can be found, if not in the protocol. |    |
| 43 |                        |      | Alternatively, an explanation of why a DMC is not needed                |    |
| 44 |                        |      |                                                                         |    |
| 45 |                        |      |                                                                         |    |
| 46 |                        |      |                                                                         |    |
| 47 | Data monitoring:       | #21b | Description of any interim analyses and stopping guidelines,            | 15 |
| 48 | interim analysis       |      | including who will have access to these interim results and make the    |    |
| 49 |                        |      | final decision to terminate the trial                                   |    |
| 50 |                        |      |                                                                         |    |
| 51 |                        |      |                                                                         |    |
| 52 |                        |      |                                                                         |    |
| 53 | Harms                  | #22  | Plans for collecting, assessing, reporting, and managing solicited and  | 15 |
| 54 |                        |      | spontaneously reported adverse events and other unintended effects      |    |
| 55 |                        |      | of trial interventions or trial conduct                                 |    |
| 56 |                        |      |                                                                         |    |
| 57 |                        |      |                                                                         |    |
| 58 | Auditing               | #23  | Frequency and procedures for auditing trial conduct, if any, and        | 15 |
| 59 |                        |      |                                                                         |    |
| 60 |                        |      |                                                                         |    |



|    |                                             |                                                                                                                                                                                                                                                                                          |     |
|----|---------------------------------------------|------------------------------------------------------------------------------------------------------------------------------------------------------------------------------------------------------------------------------------------------------------------------------------------|-----|
|    |                                             | whether the process will be independent from investigators and the sponsor                                                                                                                                                                                                               |     |
|    |                                             |                                                                                                                                                                                                                                                                                          |     |
|    |                                             |                                                                                                                                                                                                                                                                                          |     |
| 4  | Research ethics approval                    | #24 Plans for seeking research ethics committee / institutional review board (REC / IRB) approval                                                                                                                                                                                        | 16  |
| 5  |                                             |                                                                                                                                                                                                                                                                                          |     |
| 6  |                                             |                                                                                                                                                                                                                                                                                          |     |
| 7  |                                             |                                                                                                                                                                                                                                                                                          |     |
| 8  | Protocol amendments                         | #25 Plans for communicating important protocol modifications (eg, changes to eligibility criteria, outcomes, analyses) to relevant parties (eg, investigators, REC / IRBs, trial participants, trial registries, journals, regulators)                                                   | 16  |
| 9  |                                             |                                                                                                                                                                                                                                                                                          |     |
| 10 |                                             |                                                                                                                                                                                                                                                                                          |     |
| 11 |                                             |                                                                                                                                                                                                                                                                                          |     |
| 12 |                                             |                                                                                                                                                                                                                                                                                          |     |
| 13 |                                             |                                                                                                                                                                                                                                                                                          |     |
| 14 | Consent or assent                           | #26a Who will obtain informed consent or assent from potential trial participants or authorised surrogates, and how (see Item 32)                                                                                                                                                        | 9   |
| 15 |                                             |                                                                                                                                                                                                                                                                                          |     |
| 16 |                                             |                                                                                                                                                                                                                                                                                          |     |
| 17 |                                             |                                                                                                                                                                                                                                                                                          |     |
| 18 | Consent or assent: ancillary studies        | #26b Additional consent provisions for collection and use of participant data and biological specimens in ancillary studies, if applicable                                                                                                                                               | 9   |
| 19 |                                             |                                                                                                                                                                                                                                                                                          |     |
| 20 |                                             |                                                                                                                                                                                                                                                                                          |     |
| 21 |                                             |                                                                                                                                                                                                                                                                                          |     |
| 22 | Confidentiality                             | #27 How personal information about potential and enrolled participants will be collected, shared, and maintained in order to protect confidentiality before, during, and after the trial                                                                                                 | 16  |
| 23 |                                             |                                                                                                                                                                                                                                                                                          |     |
| 24 |                                             |                                                                                                                                                                                                                                                                                          |     |
| 25 |                                             |                                                                                                                                                                                                                                                                                          |     |
| 26 |                                             |                                                                                                                                                                                                                                                                                          |     |
| 27 | Declaration of interests                    | #28 Financial and other competing interests for principal investigators for the overall trial and each study site                                                                                                                                                                        | 17  |
| 28 |                                             |                                                                                                                                                                                                                                                                                          |     |
| 29 |                                             |                                                                                                                                                                                                                                                                                          |     |
| 30 |                                             |                                                                                                                                                                                                                                                                                          |     |
| 31 | Data access                                 | #29 Statement of who will have access to the final trial dataset, and disclosure of contractual agreements that limit such access for investigators                                                                                                                                      | 17  |
| 32 |                                             |                                                                                                                                                                                                                                                                                          |     |
| 33 |                                             |                                                                                                                                                                                                                                                                                          |     |
| 34 |                                             |                                                                                                                                                                                                                                                                                          |     |
| 35 |                                             |                                                                                                                                                                                                                                                                                          |     |
| 36 | Ancillary and post trial care               | #30 Provisions, if any, for ancillary and post-trial care, and for compensation to those who suffer harm from trial participation                                                                                                                                                        | 9   |
| 37 |                                             |                                                                                                                                                                                                                                                                                          |     |
| 38 |                                             |                                                                                                                                                                                                                                                                                          |     |
| 39 |                                             |                                                                                                                                                                                                                                                                                          |     |
| 40 | Dissemination policy: trial results         | #31a Plans for investigators and sponsor to communicate trial results to participants, healthcare professionals, the public, and other relevant groups (eg, via publication, reporting in results databases, or other data sharing arrangements), including any publication restrictions | 16  |
| 41 |                                             |                                                                                                                                                                                                                                                                                          |     |
| 42 |                                             |                                                                                                                                                                                                                                                                                          |     |
| 43 |                                             |                                                                                                                                                                                                                                                                                          |     |
| 44 |                                             |                                                                                                                                                                                                                                                                                          |     |
| 45 |                                             |                                                                                                                                                                                                                                                                                          |     |
| 46 |                                             |                                                                                                                                                                                                                                                                                          |     |
| 47 | Dissemination policy: authorship            | #31b Authorship eligibility guidelines and any intended use of professional writers                                                                                                                                                                                                      | 16  |
| 48 |                                             |                                                                                                                                                                                                                                                                                          |     |
| 49 |                                             |                                                                                                                                                                                                                                                                                          |     |
| 50 |                                             |                                                                                                                                                                                                                                                                                          |     |
| 51 | Dissemination policy: reproducible research | #31c Plans, if any, for granting public access to the full protocol, participant-level dataset, and statistical code                                                                                                                                                                     | 16  |
| 52 |                                             |                                                                                                                                                                                                                                                                                          |     |
| 53 |                                             |                                                                                                                                                                                                                                                                                          |     |
| 54 |                                             |                                                                                                                                                                                                                                                                                          |     |
| 55 | Informed consent materials                  | #32 Model consent form and other related documentation given to participants and authorised surrogates                                                                                                                                                                                   | N/A |
| 56 |                                             |                                                                                                                                                                                                                                                                                          |     |
| 57 |                                             |                                                                                                                                                                                                                                                                                          |     |
| 58 |                                             |                                                                                                                                                                                                                                                                                          |     |
| 59 |                                             |                                                                                                                                                                                                                                                                                          |     |
| 60 |                                             |                                                                                                                                                                                                                                                                                          |     |

1 Biological specimens #33 Plans for collection, laboratory evaluation, and storage of biological N/A  
2 specimens for genetic or molecular analysis in the current trial and  
3 for future use in ancillary studies, if applicable  
4  
5

6 The SPIRIT checklist is distributed under the terms of the Creative Commons Attribution License CC-BY-ND  
7 3.0. This checklist was completed on 08. March 2019 using <https://www.goodreports.org/>, a tool made by the  
8 [EQUATOR Network](#) in collaboration with [Penelope.ai](#)  
9  
10  
11  
12  
13  
14  
15  
16  
17  
18  
19  
20  
21  
22  
23  
24  
25  
26  
27  
28  
29  
30  
31  
32  
33  
34  
35  
36  
37  
38  
39  
40  
41  
42  
43  
44  
45  
46  
47  
48  
49  
50  
51  
52  
53  
54  
55  
56  
57  
58  
59  
60

# BMJ Open

## The DIVERT-CARE (Collaboration Action Research & Evaluation) Trial Protocol: A Multi-Provincial Pragmatic Cluster Randomized Trial of Cardio-Respiratory Management in Home Care

|                               |                                                                                                                                                                                                                                                                                                                                                                                                                                                                                                                                                                                                                                                                                                                                                                                                                                                                                                                                                                                                                                                                                                                                                                                                                                                                                                                                                                                                                                                                                                                                                                                                                                                                                                                                                                                                                                                                                                                                                                                                                                                                                                                                                                                                                                                                                                                                                                                                    |
|-------------------------------|----------------------------------------------------------------------------------------------------------------------------------------------------------------------------------------------------------------------------------------------------------------------------------------------------------------------------------------------------------------------------------------------------------------------------------------------------------------------------------------------------------------------------------------------------------------------------------------------------------------------------------------------------------------------------------------------------------------------------------------------------------------------------------------------------------------------------------------------------------------------------------------------------------------------------------------------------------------------------------------------------------------------------------------------------------------------------------------------------------------------------------------------------------------------------------------------------------------------------------------------------------------------------------------------------------------------------------------------------------------------------------------------------------------------------------------------------------------------------------------------------------------------------------------------------------------------------------------------------------------------------------------------------------------------------------------------------------------------------------------------------------------------------------------------------------------------------------------------------------------------------------------------------------------------------------------------------------------------------------------------------------------------------------------------------------------------------------------------------------------------------------------------------------------------------------------------------------------------------------------------------------------------------------------------------------------------------------------------------------------------------------------------------|
| Journal:                      | <i>BMJ Open</i>                                                                                                                                                                                                                                                                                                                                                                                                                                                                                                                                                                                                                                                                                                                                                                                                                                                                                                                                                                                                                                                                                                                                                                                                                                                                                                                                                                                                                                                                                                                                                                                                                                                                                                                                                                                                                                                                                                                                                                                                                                                                                                                                                                                                                                                                                                                                                                                    |
| Manuscript ID                 | bmjopen-2019-030301.R1                                                                                                                                                                                                                                                                                                                                                                                                                                                                                                                                                                                                                                                                                                                                                                                                                                                                                                                                                                                                                                                                                                                                                                                                                                                                                                                                                                                                                                                                                                                                                                                                                                                                                                                                                                                                                                                                                                                                                                                                                                                                                                                                                                                                                                                                                                                                                                             |
| Article Type:                 | Protocol                                                                                                                                                                                                                                                                                                                                                                                                                                                                                                                                                                                                                                                                                                                                                                                                                                                                                                                                                                                                                                                                                                                                                                                                                                                                                                                                                                                                                                                                                                                                                                                                                                                                                                                                                                                                                                                                                                                                                                                                                                                                                                                                                                                                                                                                                                                                                                                           |
| Date Submitted by the Author: | 19-Sep-2019                                                                                                                                                                                                                                                                                                                                                                                                                                                                                                                                                                                                                                                                                                                                                                                                                                                                                                                                                                                                                                                                                                                                                                                                                                                                                                                                                                                                                                                                                                                                                                                                                                                                                                                                                                                                                                                                                                                                                                                                                                                                                                                                                                                                                                                                                                                                                                                        |
| Complete List of Authors:     | <p>Costa, Andrew P ; McMaster University Faculty of Health Sciences, Department of Health Research Methods, Evidence, and Impact; McMaster University, Department of Medicine</p> <p>Schumacher, Connie; McMaster University Faculty of Health Sciences, Department of Health Research Methods, Evidence, and Impact; Hamilton Haldimand Niagara Brant Local Health Integration Network</p> <p>Jones, Aaron; McMaster University Faculty of Health Sciences, Department of Health Research Methods, Evidence, and Impact</p> <p>Dash, Darly; McMaster University Faculty of Health Sciences, Department of Health Research Methods, Evidence, and Impact</p> <p>Campbell, Graham; McMaster University Faculty of Health Sciences, Department of Health Research Methods, Evidence, and Impact</p> <p>Junek, Mats; McMaster University Faculty of Health Sciences, Department of Health Research Methods, Evidence, and Impact; McMaster University, Department of Medicine</p> <p>Agarwal, Gina; McMaster University, Department of Family Medicine; McMaster University Faculty of Health Sciences, Department of Health Research Methods, Evidence, and Impact</p> <p>Bell, Chaim; Mount Sinai Hospital, Department of Medicine</p> <p>Boscart, Veronique; Conestoga College Institute of Technology and Advanced Learning, Schlegel Centre for Advancing Seniors Care; Canadian Institutes of Health Research, Schlegel Industrial Research Chair in Seniors Care</p> <p>Bronskill, Susan; University of Toronto, Institute for Clinical Evaluative Sciences</p> <p>Feeny, David; McMaster University, Department of Economics</p> <p>Hébert, Paul C; Université de Montréal, Department of Medicine</p> <p>Heckman, George; University of Waterloo, School of Public Health and Health Systems; Research Institute for Aging, Schlegel Research Chair in Geriatric Medicine</p> <p>Hirdes, John; University of Waterloo, School of Public Health and Health Systems</p> <p>Lee, Linda; McMaster University, Department of Family Medicine</p> <p>McKelvie, Robert; Western University, Department of Medicine; St. Joseph's Health Care London, Department of Medicine</p> <p>Mitchell, Lori; Winnipeg Regional Health Authority, Home Care</p> <p>Sinha, Samir; University of Toronto, Departments of Medicine, Family and Community Medicine, and Institute of Health Policy, Management</p> |

|                                    |                                                                                                                                                                                                                                                                                                                                                                                                                                                                     |
|------------------------------------|---------------------------------------------------------------------------------------------------------------------------------------------------------------------------------------------------------------------------------------------------------------------------------------------------------------------------------------------------------------------------------------------------------------------------------------------------------------------|
|                                    | and Evaluation<br>Davis, Joy; Western Health Care Corp, Information Management<br>Priddle, Tammy; Western Health Care Corp, Community Support<br>Rose, Joanne; Government of Newfoundland and Labrador, Department<br>of Health and Community Services<br>Gillan, Roslyn; Island Health, Community Health Services<br>Mills, Deborah; Island Health, Community Health Services<br>Haughton, Dilys; Hamilton Niagara Haldimand Brant Community Care<br>Access Centre |
| <b>Primary Subject<br>Heading</b>: | Health services research                                                                                                                                                                                                                                                                                                                                                                                                                                            |
| Secondary Subject Heading:         | Health services research                                                                                                                                                                                                                                                                                                                                                                                                                                            |
| Keywords:                          | Cardio-Respiratory Disease Management, Chronic Disease Management,<br>Cluster-randomized, DIVERT Scale, Home Care                                                                                                                                                                                                                                                                                                                                                   |
|                                    |                                                                                                                                                                                                                                                                                                                                                                                                                                                                     |

SCHOLARONE™  
Manuscripts

Version: 6.4(AC)

Date: September, 2019

**The DIVERT-CARE (Collaboration Action Research & Evaluation) Trial Protocol: A Multi-Provincial Pragmatic Cluster Randomized Trial of Cardio-Respiratory Management in Home Care**

Andrew P. Costa, Connie Schumacher, Aaron Jones, Darly Dash, Graham Campbell, Mats Junek, Gina Agarwal, Chaim Bell, Veronique Boscart, Susan Bronskill, David H. Feeny, Paul Hébert, George Heckman, John P. Hirdes, Linda Lee, Robert McKelvie, Lori Mitchell, Samir Sinha, Joy Davis, Tammy Priddle, Joanne Rose, Roslyn Gillan, Deborah Mills, Dilys Haughton

Andrew P. Costa, Department of Health Research Methods, Evidence, and Impact, McMaster University, Hamilton, Canada; Department of Medicine, McMaster University, Hamilton, Canada; Schlegel Chair in Clinical Epidemiology & Aging

Connie Schumacher, Department of Health Research Methods, Evidence, and Impact, McMaster University, Hamilton, Canada; Hamilton Niagara Haldimand Brant Local Health Integration Network, Hamilton, Ontario, Canada

Aaron Jones, Department of Health Research Methods, Evidence, and Impact, McMaster University, Hamilton, Canada

Darly Dash, Department of Health Research Methods, Evidence, and Impact, McMaster University, Hamilton, Canada

Graham Campbell, Department of Health Research Methods, Evidence, and Impact, McMaster University, Hamilton, Canada

Mats Junek, Department of Health Research Methods, Evidence, and Impact; Department of Medicine, McMaster University, Hamilton, Canada

Gina Agarwal, Department of Family Medicine, McMaster University, Hamilton, Canada; Department of Health Research Methods, Evidence, and Impact, McMaster University, Hamilton, Canada

Chaim M. Bell, Department of Medicine, Mount Sinai Hospital, Toronto, Canada

Veronique Boscart, Schlegel Centre for Advancing Seniors Care, Conestoga College Institute of Technology & Advanced Learning, Kitchener, Canada; CIHR/Schlegel Industrial Research Chair in Seniors Care

Susan E. Bronskill, Institute for Clinical Evaluative Sciences, Toronto, Canada

David H. Feeny, Department of Economics, McMaster University, Hamilton, Canada

Paul Hébert, Department of Medicine, Université de Montréal, Montréal, Canada

George A. Heckman, School of Public Health and Health Systems, University of Waterloo, Waterloo, Canada; Schlegel Research Chair in Geriatric Medicine

1  
2  
3 John P. Hirdes, School of Public Health and Health Systems, University of Waterloo, Waterloo,  
4 Canada

5  
6 Linda Lee, Department of Family Medicine, McMaster University, Hamilton, Canada

7  
8 Robert S. McKelvie, Professor, Department of Medicine (Cardiology), Western University and St.  
9 Joseph's Health Care, London, Canada

10  
11 Lori Mitchell, Home Care, Winnipeg Regional Health Authority, Winnipeg, Canada

12  
13 Samir K. Sinha, Departments of Medicine, Family and Community Medicine and Institute of  
14 Health Policy, Management and Evaluation, University of Toronto, Toronto, Canada

15  
16 Joy Davis, Information Management, Western Health, Corner Brook, Canada

17  
18 Tammy Priddle, Community Support, Western Health, Corner Brook, Canada

19  
20 Joanne Rose, Department of Health and Community Services, Government of Newfoundland  
21 and Labrador, St. John's, Canada

22  
23 Roslyn Gillan, Community Health Services, Island Health, Victoria, Canada

24  
25 Deborah Mills, Community Health Services, Island Health, Victoria, Canada

26  
27 Dilys Haughton, Niagara Haldimand Brant Community Care Access Centre, Hamilton, Ontario,  
28 Canada

29  
30 **Corresponding Author**

31 Andrew P Costa, Ph.D.

32 Schlegel Chair in Clinical Epidemiology & Aging

33 Dept. of Health Research Methods, Evidence, and Impact & Dept. of Medicine

34 McMaster University

35 CRL-219, 1280 Main St. W., Hamilton, ON, L8S 4K1

36 905 525 9140 x22067

37 acosta@mcmaster.ca

38  
39  
40 **(300 words abstract, 4000 words total)**

41  
42  
43 Abstract Word Count: 254

44  
45 Manuscript Word Count: 3,774

## ABSTRACT

### Introduction:

Home care clients are increasingly medically complex, have limited access to effective chronic disease management, and have very high emergency department (ED) visitation rates. There is a need for more appropriate and targeted supportive chronic disease management for home care clients. We aim to evaluate the effectiveness and preliminary cost-effectiveness of a targeted, person-centered cardio-respiratory management model.

### Methods and analysis:

The DIVERT (Detection of Indicators and Vulnerabilities of Emergency Room Trips) – Care trial is a pragmatic, cluster-randomized, multi-center superiority trial of a flexible multi-component cardio-respiratory management model based on best-practice guidelines. The trial will be conducted in partnership with three regional, public-sector, home care providers across Canada. The primary outcome of the trial is the difference in time to first unplanned ED visit (hazard rate) within six months. Additional secondary outcomes are to identify changes in patient activation, changes in cardio-respiratory symptom frequencies, and cost-effectiveness over six months. We will also investigate the difference in the number of unplanned ED visits, number of inpatient hospitalizations, and changes in health-related quality of life. Multi-level proportional hazard and generalized linear models will be used to test the primary and secondary hypotheses. Sample size simulations indicate that enrolling 1,100 home care clients across 36 clusters (home care caseloads) will yield a power of 81% given a hazard ratio of 0.75.

### Ethics and dissemination:

Ethics approval was obtained at all participating sites. Results will be submitted for publication in peer-reviewed journals and for presentation at relevant conferences. Home care service partners will also be informed of the study's results. The results will be used to inform future support strategies for older adults receiving home care services.

**Trial registration number:** ClinicalTrials.gov: NCT03012256

**Keywords:** Cardio-Respiratory Disease Management, Chronic Disease Management, Cluster-randomized, DIVERT Scale, Home Care

### Strengths and limitations of this study

- The pragmatic attitude of the trial towards cluster selection, cluster assignment, participant selection, participant recruitment, informed consent, and outcome measurement supports generalization to other jurisdictions.
- Post randomization selection bias is limited by the use of existing, objective measures of eligibility.
- The use of secondary data for baseline data collection and follow-up measurement increases the accuracy of the data collection and limits the loss to follow-up compared to primary collection methods.
- It is not possible to conceal the treatment assignment, which exposes half of the primary and secondary outcomes measures to placebo and observer-expectancy effects.
- The jurisdictions included in the study used a convenience, non-probability sampling approach in cluster selection, which may limit external validity.



## INTRODUCTION:

Publicly-funded home care services are delivered to at least 6% of Canadians age 65-74, 15% age 75-84 and 32% age 85 or older. [1] These home care clients are increasingly medically complex, often access care across multiple settings, have very high emergency department (ED) visitation rates, and have relatively poor access to effective chronic disease management.[2–4] Their frequent ED use is not congruent with chronic disease management or geriatric care principles and creates excess cost burdens on the health care system.[5,6]

Effective chronic disease management models employ multiple components delivered by a coordinated multidisciplinary team.[7] According to the ‘chronic disease management model’, home care plays a complementary function to the care medical practitioners provide.[7] Clinical and self-care support, as well as case management are among the most effective components in chronic disease management.[8–10] Self-care education and support has been shown to improve health outcomes across chronic diseases.[11,12] The provision of sustained follow-up by nurses or non-medical staff can also be effective.[13,14]

Effective home care services have been limited by insufficient targeting of clients that are most at need or most likely to benefit.[15,16] We developed and validated a prognostic case-finding tool for home care clients known as the Detection of Indicators and Vulnerabilities of Emergency Room Trips (DIVERT) Scale that has been recommended for use in the provision of home care.[17–19] It can be derived in real time from the interRAI Home Care (RAI-HC) standardized home care assessment system used in 9 Canadian provinces as well as Estonia, Finland, Hong Kong, Iceland, Ireland, Italy, Japan, the Netherlands, New Zealand, Singapore, Spain, Switzerland, and 29 U.S. states. Cardio-respiratory symptoms and conditions are prominent predictive elements of the DIVERT Scale.

Canadian home care providers, historically focused on the delivery of personal support services, have started to develop supportive chronic disease management capacity (e.g., specialist nurse monitoring).[20] Most trials, however, exclude frail seniors and are not specific to home care, which leaves little evidence to inform chronic disease management practices in this large sector of health care.[17]

From evidence-based guidelines developed – in part – by our team, extensive client profiling, and input of clients/families as well as health professionals, we developed a person-centred, multi-component cardio-respiratory management model. Our approach is based on evidence of effective implementations in other fields,[21] and includes all elements for ‘person-centred care’.[22] The pilot study was recognized on the 2015 Ontario Minister of Health and Long-Term Care’s Medal Honour Roll for Excellence in Health Quality.[23,24]

Recent Canadian trials have tested a ‘Virtual Ward’ and a ‘transitional care services’ model in post-acute adult patients (the latter with heart failure) and found no benefit.[25,26] The ‘Virtual Ward Model’ cited difficulty of hospital teams to integrate with community-based care. Community-based chronic disease management can reduce hospital use.[25,27] Our study diverges from this given that we focus on home care clients who are frail and not specifically

1  
2  
3 'post-acute'. Also, our intervention leverages a validated case finding tool based on real-time  
4 inputs from community-based providers rather than care from hospital-based teams.  
5

6  
7 The DIVERT-CARE trial will adopt a pragmatic attitude to avoid the well-documented difficulty  
8 that many clinical trials have in producing results that are generalizable to real-world  
9 conditions.[28,29] As our interest is in the effects of the intervention under realistic rather than  
10 optimal conditions, the intervention will be delivered in usual care settings by usual care  
11 providers for usual clients. Home care caseloads will be randomized to intervention or control  
12 rather than individual clients in order to mimic the process that would occur when clinical  
13 practice changes. Cluster randomized designs are commonly utilized in pragmatic trials as  
14 practice changes are implemented at levels higher than the client in real-world  
15 conditions.[30,31] The DIVERT-CARE trial will also make use of secondary data sources for  
16 outcome measurement. The use of administrative data has been shown to be more accurate  
17 than client-reported results for health services utilization and permits excellent follow-up over  
18 long periods of time without the need for intrusive follow-up procedures.[32,33] A number of  
19 pragmatic, cluster-randomized trials using administrative data have appeared in the  
20 literature.[34–37]  
21  
22  
23  
24

25 This paper describes the protocol and presents the rationale for a cluster-randomized study  
26 investigating the effectiveness of a cardio-respiratory disease management model in a targeted  
27 home care client population. This paper complies with the SPIRIT 2013 recommendations for  
28 clinical trial protocol reporting.[38] This trial will report findings in accordance with CONSORT  
29 guidelines.[39]  
30  
31

## 32 **METHODS AND ANALYSIS:**

### 33 **Study Population**

34 The trial will be conducted in partnership with three regional, public-sector, home care  
35 providers across Canada: Hamilton-Niagara-Haldimand-Brant Local Health Integration Network  
36 (HNHB LHIN) in Ontario, Western Health in Newfoundland, and Island Health in British  
37 Columbia. These three Canadian jurisdictions were selected from 5 potential jurisdictions that  
38 expressed interest based on their geographical (West, Central, and East) and political-cultural  
39 diversity. Each health care provider will select a number of home care caseloads to be included  
40 in the study based on historical practice patterns from each sub-region including caseload size,  
41 home care enrollment, and assessment patterns. A caseload represents a group of clients in a  
42 small geographical area that is served by a home care coordinator (or 'case manager').  
43 Recruitment and randomization will occur at the level of the caseload and as such, clients were  
44 not involved in the research strategy. Each site will select enough caseloads to enroll  
45 approximately 360 long-stay home care clients, for a total of 1,100 clients over a 1.5-year time  
46 frame. We expect that over 42 distinct geographic home care caseloads will be enrolled in total.  
47  
48  
49  
50  
51

### 52 **Study Design**

53 The DIVERT-CARE trial is a pragmatic, cluster-randomized, two-arm parallel cluster, multi-  
54 center, superiority trial with a primary outcome of time to first ED visit within 6 months of the  
55 index home care clinical assessment. The unit of randomization/intervention will be the cluster  
56  
57  
58  
59  
60

(home care caseload; Figure 1: Caseload randomization schematic), while the unit of inference/measurement/analyses will be the home care client. The cluster-randomized design limits the potential for contamination and differential enrollment given that management and discretion over the use of resources is contained within each home care caseload. This design also supports the feasibility of the trial by reducing the number of resources (care providers) required to be trained in the intervention protocol. See Table 1 for an overview of the trial methods and design; Protocol Version 2.1 (2017-04-17).

**Figure 1: Caseload Randomization Schematic**

<see Figure 1 attachment.>

**Table 1: World Health Organization Trial Registration Data Set for DIVERT-CARE Trial (as of 11.03.2019; Protocol Version 2.1, 2017-04-17)**

| <b>Data Category</b>                          | <b>Information</b>                                                                                                                                                                                                                                                             |
|-----------------------------------------------|--------------------------------------------------------------------------------------------------------------------------------------------------------------------------------------------------------------------------------------------------------------------------------|
| Primary registry and trial identifying number | ClinicalTrials.gov<br>NCT03012256                                                                                                                                                                                                                                              |
| Date of registration in primary registry      | 6 January, 2017                                                                                                                                                                                                                                                                |
| Secondary identifying numbers                 |                                                                                                                                                                                                                                                                                |
| Source(s) of monetary or material support     | Canadian Institutes of Health Research (CIHR); Hamilton Niagara Haldimand Brant Community Local Health Integration Network (Hamilton, Ontario); Western Health (Corner Brook, Newfoundland and Labrador); Island Health (Victoria, British Columbia); Canadian Frailty Network |
| Primary sponsor                               | McMaster University                                                                                                                                                                                                                                                            |
| Secondary sponsor(s)                          | N/A                                                                                                                                                                                                                                                                            |
| Contact for public queries                    | Graham Campbell, MA [campbg4@mcmaster.ca]                                                                                                                                                                                                                                      |
| Contact for scientific queries                | Andrew Costa, PhD [acosta@mcmaster.ca]<br>McMaster University                                                                                                                                                                                                                  |
| Public title                                  | The DIVERT-CARE (Collaboration Action Research & Evaluation) Trial                                                                                                                                                                                                             |
| Scientific title                              | The DIVERT-CARE (Collaboration Action Research & Evaluation) Trial: A Multi Provincial Pragmatic Cluster Randomized Trial of Cardio-Respiratory Management in Home Care                                                                                                        |
| Countries of recruitment                      | Canada                                                                                                                                                                                                                                                                         |
| Health condition(s) or problem(s) studied     | Heart Failure; COPD                                                                                                                                                                                                                                                            |
| Intervention(s)                               | <b>Experimental:</b> Cardio-respiratory management model[40]<br><b>Control:</b> usual care / no intervention                                                                                                                                                                   |
| Key inclusion and exclusion criteria          | <b>Inclusion Criteria:</b>                                                                                                                                                                                                                                                     |

|    |                         |                                                                  |
|----|-------------------------|------------------------------------------------------------------|
| 1  |                         |                                                                  |
| 2  |                         |                                                                  |
| 3  |                         | Long-stay home care clients living in a non-institutional        |
| 4  |                         | setting (i.e. admitted to home care and receive                  |
| 5  |                         | comprehensive clinical assessment (RAI-HC))                      |
| 6  |                         | Clients with DIVERT score of 9, 10, 14, or 15 (i.e. at least one |
| 7  |                         | cardio-respiratory symptom [chest pain, dyspnea, dizziness,      |
| 8  |                         | irregular pulse]and at least one cardiac condition               |
| 9  |                         | [congestive heart failure or coronary artery disease])           |
| 10 |                         | <b>Exclusion Criteria:</b>                                       |
| 11 |                         | Clients receiving palliative care (i.e. Prognosis of less than   |
| 12 |                         | six months to live at time of assessment [Q. K8e from RAI-       |
| 13 |                         | HC])                                                             |
| 14 |                         | Clients receiving dialysis (Q. P2g from RAI-HC)                  |
| 15 |                         |                                                                  |
| 16 |                         |                                                                  |
| 17 |                         |                                                                  |
| 18 | Study type              | Interventional                                                   |
| 19 |                         | Allocation: cluster randomized intervention model. Parallel      |
| 20 |                         | assignment, open label                                           |
| 21 |                         | Primary purpose: prevention                                      |
| 22 |                         | Pragmatic                                                        |
| 23 |                         |                                                                  |
| 24 | Date of first enrolment | 6 February, 2018                                                 |
| 25 | Target sample size      | 1080                                                             |
| 26 | Recruitment status      | Recruiting                                                       |
| 27 | Primary outcome(s)      | The difference in days to first unplanned emergency              |
| 28 |                         | department visit (hazard rate) [Time Frame: Up to six            |
| 29 |                         | months from baseline]; The difference in total care costs        |
| 30 |                         | controlling for length of stay [Time Frame: Up to six months     |
| 31 |                         | from baseline]; Changes in patient activation (patient           |
| 32 |                         | activation questionnaire) [Time Frame: Baseline, 2 months,       |
| 33 |                         | 4 months, 6 months]; The difference in the number of             |
| 34 |                         | symptoms [Time Frame: Baseline, 2 months, 4 months, 6            |
| 35 |                         | months]                                                          |
| 36 |                         |                                                                  |
| 37 |                         |                                                                  |
| 38 | Key secondary outcomes  | The difference in the number of unplanned emergency              |
| 39 |                         | department visits [Time Frame: Up to six months from             |
| 40 |                         | baseline]; Description of health-related quality of life         |
| 41 |                         | (quality of life questionnaire) [Time Frame: 4 months, 6         |
| 42 |                         | months]                                                          |
| 43 |                         |                                                                  |
| 44 |                         |                                                                  |

### Study Objectives

Our main objective is to evaluate the effectiveness and preliminary cost-effectiveness of a targeted, person-centered cardio-respiratory management model. The sample size for the primary outcome was calculated to determine whether the cardio-respiratory disease management model is superior to standard of care in postponing unplanned ED visits. Additional outcomes include determining if the cardio-respiratory disease management model is superior to standard of care in improving client activation, reducing symptoms, and the cost-effectiveness of this model. The symptoms of interest are shortness of breath, chest pain at rest

1  
2  
3 or on exertion, dizziness, perceived pain control, edema, noticeable decrease in food/fluids  
4 consumed, and unintended weight loss.  
5

6  
7 Secondary objectives include determining if the cardio-respiratory disease management model  
8 is superior to standard of care for the number of unplanned ED visits, number of unplanned  
9 hospital admissions, and change in health-related quality of life (HRQOL). HRQOL will be  
10 assessed by the Minimal Data Set Health Status Index (MDS-HSI), which is a RAI-HC derived  
11 measure based on the Health Utilities Index Mark 2 that has demonstrated longitudinal  
12 construct validity.[41,42]  
13  
14

### 15 **Eligibility Criteria**

16 The pragmatic attitude of the trial warrants the broadest inclusion criteria that are feasible. To  
17 be eligible for inclusion into this trial, home care clients must possess the following  
18 characteristics:  
19

- 20 • Admitted to home care and receive comprehensive clinical assessment (RAI-HC) as part  
21 of regular home care enrolment, or reassessment;
- 22 • 19 years or older at time of assessment; and
- 23 • Categorized into DIVERT subgroups 9,10,14, or 15 (Figure 2: DIVERT Scale Target  
24 Groups). This includes:  
25 ○ those with cardio-respiratory symptoms (chest pain, dyspnea, dizziness, irregular  
26 pulse) who have a diagnosis of chronic cardiac disease and have not used an ED  
27 or hospital in the last 90 days (9, 10); OR  
28 ○ those with cardio-respiratory symptoms who have had one ED or hospital  
29 exposure in the last 90 days, regardless of if they are diagnosed with chronic  
30 cardiac disease (14, 15).  
31  
32  
33  
34

### 35 **Figure 2: DIVERT Scale Target Groups**

<see Figure 2 attachment.>

36  
37 We will exclude clients with a prognosis of less than six months to live at time of assessment (Q.  
38 K8e from RAI-HC) and clients requiring dialysis treatment (Q. P2g from RAI-HC). The exclusion of  
39 palliative and dialysis care clients is necessary as some jurisdictions place these clients on  
40 specialized caseloads.  
41  
42

43 The eligibility criteria for the trial will result in a population that is representative of non-  
44 palliative home care clients in Canada who have cardio-respiratory symptoms and conditions. It  
45 captures approximately 1/3 of all assessed home care clients. However, we excluded individuals  
46 with cardio-respiratory symptoms with 2 or more hospital or ED episodes in the past 90 days  
47 given that they were determined in a pilot study to have exceedingly complex psycho-social  
48 needs (such as housing) that we could not address. They account for less than 4% of home care  
49 clients.  
50  
51  
52

### 53 **Recruitment and Consent**

54 All non-palliative, non-dialysis, adult home care clients in the trial caseloads assessed using the  
55 RAI-HC (during regular home care enrollment or reassessment) who fall into one of the four  
56  
57  
58

1  
2  
3 target DIVERT subgroups will be enrolled into the study by a care coordinator at the time of  
4 assessment. Eligible clients will automatically be included into the intervention or 'regular care'  
5 control groups on an intent-to-treat basis. Recruitment is expected to proceed over 6-9 months  
6 for each site. Analysis of the sample size simulations that were carried out on retrospective  
7 data from the HNNB LHIN region from November 2014 to June 2015 indicates an expected  
8 enrollment of 4 clients per caseload per month.  
9  
10

11 Each home care partners' process for attaining consent will apply to the trial. Individual  
12 informed consent will not be sought given that the cardio-respiratory management model is  
13 accepted, considered best practice care, and is offered – whole or in part – at the full clinical  
14 discretion of the home care provider as per existing practice. Trial investigators have no part in  
15 the data collection, individual care decision-making, or record management during the study  
16 period beyond providing overall scientific guidance. We requested and received alteration to  
17 the requirements for consent based on satisfying the following Canadian Tri-Council Policy  
18 Statement: Ethical Conduct for Research Involving Humans (TCPS 2) criteria:[43]  
19  
20  
21

- 22 1. The research involves no more than minimal risk to the participants.
- 23 2. The alteration to consent requirements is unlikely to adversely affect the welfare of  
24 participants.
- 25 3. It is impossible or impracticable to carry out the research and to address the research  
26 questions properly, given the research design, if the prior consent of participants is  
27 required.
- 28 4. In the case of a proposed alteration, the precise nature and extent of any proposed  
29 alteration is defined.
- 30 5. The plan to provide a debriefing (if any) which may offer participants the possibility of  
31 refusing consent and/or withdrawing data and/or human biological materials, shall be in  
32 accordance with Article 3.7B.  
33  
34  
35  
36

37 Our waiver of informed consent complies with existing methodological and ethical guidelines  
38 for pragmatic cluster-randomized trials. Existing guidelines state that informed consent by  
39 clients is not needed if "the intervention is to the clear advantage of every person in the cluster  
40 for the cluster to be entered in the trial"[44].  
41  
42  
43

### 44 **Intervention**

45 Care planning and self-care support have been shown to be among the most effective elements  
46 of cardio-respiratory disease management[8,10] along with sustained follow-up by nurses or  
47 non-medical staff [13,14]. Care planning will be completed in a collaborative fashion amongst a  
48 care coordinator, the client, and the client's caregivers (both formal and informal). Clients in the  
49 intervention group will have their care plans guided by a multi-component cardio-respiratory  
50 disease management model in addition to receiving their usual care.[39] This comprehensive  
51 model for the intervention has been described in greater detail in a previous publication.[40]  
52 The person-centered, multi-component cardio-respiratory management model was developed  
53 based on guidelines,[17,45,46] extensive home care client profiling, and input from  
54 clients/families and health professionals. The management model contains the following  
55  
56  
57  
58  
59  
60

components (see Table 2: Description of Intervention Components): scheduled nurse-led self-management support (based on a training program and tool-kit); access to a staffed helpline; education on vaccines; advance care and goal planning; clinical pharmacist medication reconciliation; team case rounds; situation, background, assessment, and recommendation (SBAR) communication protocol with primary care; and a standardized transition package.[21,40,47] Each component has a specific objective within the model, however the manner in which it is delivered may be adapted. For example, some home care providers have clinical pharmacists on staff whereas others would rely on collaboration with community pharmacists.

**Table 2: Description of intervention components**

| <b>DIVERT-CARE Intervention Components</b>                       | <b>Description</b>                                                                                                                               |
|------------------------------------------------------------------|--------------------------------------------------------------------------------------------------------------------------------------------------|
| <b>Case Finding Using the DIVERT Scale</b>                       | Use of the DIVERT Scale (embedded in interRAI assessment) to identify home care clients most likely to benefit.                                  |
| <b>Self-Management Education and Supports</b>                    | In-home assessment of self-management goals and needs, with practical education and skills training to recognize and manage symptoms.            |
| <b>Access to an immediate nurse-staffed helpline</b>             | Direct phone line staffed by nurses involved in the DIVERT-CARE Intervention to aid with self-management and problem resolution.                 |
| <b>Promotion of Vaccines</b>                                     | Seasonal flu vaccine and pneumococcal polysaccharide (Pneu-P-23) information and health promotion consistent with Canadian practice guidelines.  |
| <b>Advance Care and Goal Planning</b>                            | Consultation for advance care and goals of care planning, advanced care decisions, and communication of care wishes.                             |
| <b>Clinical Pharmacist-Led Medication Review</b>                 | Review of medication for safety, efficacy and appropriate use of medications and delivery options.                                               |
| <b>Interprofessional Team Case Rounds</b>                        | Weekly or biweekly care team meeting to discuss care plan, update goals, and how to support changing care needs.                                 |
| <b>SBAR Communication with Primary Care Providers</b>            | SBAR formatted communication to effectively communicate disease relevant information and care updates to primary and specialist care providers.  |
| <b>Standardized ED Transition Package / Personal Care Record</b> | A succinct document to support continuity of care throughout health system. Personal care record of goals, plan of care, and community supports. |

1  
2  
3 Self-management education and supports will be tailored to the needs and goals of the client.  
4 As with all home care services, clients may refuse all or any of the intervention components.  
5 The components will be delivered over 15 weeks by care coordinators and nurses who have  
6 been trained by the research team. Care coordinators and nurses will be provided detailed  
7 manuals explaining the components and their role in supporting clients throughout the  
8 intervention. The self-management program, based on previous pilot work[24], will use a  
9 population-based care approach pioneered by Wagner (1995) to help trial partners implement  
10 the cardio-respiratory disease management model.[48]  
11  
12  
13

14 The intervention adheres to the following three principles: 1) multidisciplinary teams at each  
15 site will be trained on the protocols and resources related to each component of cardio-  
16 respiratory management model; 2) the teams will identify steps required to deliver the  
17 interventions; 3) the teams will plan the deployment of the cardio-respiratory management  
18 model that engages clients, families, and caregivers to ensure that adequate resources are  
19 dedicated to support the interventions across the intervention caseloads, while ensuring long-  
20 term sustainability.  
21  
22  
23

24 Clients in the control group will receive the usual set of home care services. No changes will be  
25 made to their care planning process. Depending on the jurisdiction and client needs, usual care  
26 may include personal support, nursing, physiotherapy, occupational therapy, and other  
27 services. Depending on the jurisdiction, access to the components described in the cardio-  
28 respiratory disease management model is either non-existent or otherwise very rare and  
29 inconsistent for clients receiving usual care.  
30  
31  
32

### 33 **Allocation**

34 Caseloads were randomized to intervention or control, and stratified by home care provider  
35 (region) and sub-region (areas with similar economic status, access to care, and geography) at a  
36 1:2 intervention to control ratio. The uneven allocation ratio increases the power of the trial  
37 while only minimally impacting operational and research resources.  
38  
39

40 A blocked allocation sequence was created via random number generation in collaboration with  
41 the biostatistics unit at St. Joseph's Healthcare Hamilton. The sequence features a 1:2 allocation  
42 ratio with a block of size three. Caseloads from each region were sorted by sub-region and  
43 allocated using the sequence. In the event that the end of the clusters in a sub-region did not  
44 coincide with the end of a block, the rest of the block was skipped and allocation of the next  
45 sub-region started with a new block.  
46  
47

### 48 **Data Collection and Outcome Measures**

49 The primary outcomes will be collected using secondary data over the six-month observation  
50 period (see Table 3: Routine Measurement). The use of routinely collected data for primary  
51 outcomes, cost, and health measures limits potential for bias from lack of blinding given that  
52 neither the care team nor the trial investigators are directly involved in the collection of  
53 outcomes. These records are accurate given that they are the basis for health care reporting  
54 systems and payments between public home care providers and contracted service providers.  
55  
56  
57  
58  
59



**Table 3: Routine Measurement**

| Activity                                                          | Staff Member     | Approximate Time to Complete | Baseline | 2 Months | 4 Months | 6 Months |
|-------------------------------------------------------------------|------------------|------------------------------|----------|----------|----------|----------|
| Assess for eligibility (If intervention caseload) (RAI-HC)        | Care coordinator | 5 minutes                    | X        |          |          |          |
| Symptoms (RAI-HC)                                                 | Care coordinator | 15 minutes                   | X        | X        | X        | X        |
| Health-related quality of life (RAI-HC)                           | Care coordinator | 30 minutes                   | X        |          | X        | X        |
| Patient Activation Measure (PAM-13)                               | Care coordinator | 5 minutes                    | X        | X        | X        | X        |
| Administrative service and billing records (CHRIS, HCC MRR, CRMS) | N/A              | N/A                          | X        | X        | X        | X        |
| Emergency department and hospital records (NACRS, DAD)            | N/A              | N/A                          | X        | X        | X        | X        |

**Legend:**RAI-HC: Resident Assessment Instrument for Home Care (<https://www.cihi.ca/en/home-care>)PAM-13: Patient Activation Measure (<https://www.insigniahealth.com/products/pam-survey>)CHRIS: Client Health and Related Information System (<https://hssontario.ca/Who/Pages/protecting-your-privacy.aspx>)HCC MRR: Home and Community Care Minimum Reporting Requirements (<https://www2.gov.bc.ca/assets/gov/health/forms/5502datadictionary.pdf>)

CRMS: Client and Referral Management System

([https://www.nlchi.nl.ca/images/ProvincialCRMS\\_Registration\\_User\\_Guide\\_v2\\_0\\_2017-09-01.pdf](https://www.nlchi.nl.ca/images/ProvincialCRMS_Registration_User_Guide_v2_0_2017-09-01.pdf))NACRS: National Ambulatory Care Reporting System (<https://www.cihi.ca/en/national-ambulatory-care-reporting-system-metadata>)DAD: Discharge Abstract Database (<https://www.cihi.ca/en/discharge-abstract-database-metadata>)

The main secondary data sets include the Resident Assessment Instrument for Home Care (RAI-HC), the Patient Activation Measure (PAM-13), the Client Health and Related Information System (CHRIS), the Home and Community Care Minimum Reporting Requirements (HCC MRR), the Client and Referral Management System (CRMS), the National Ambulatory Care Reporting System (NACRS), and the Discharge Abstract Database (DAD).

The RAI-HC is a standardized comprehensive assessment containing approximately 200 items and has been found to document major domains of health reliably.[49–53]

1  
2  
3 The Patient Activation Measure (PAM-13) [54] indicates the client's progress through four  
4 stages as they become activated (i.e., they believe their role in their own care is important, they  
5 learn enough to develop confidence to act on their own belief, they actually act, and they reach  
6 the point where they can act even under stress). The PAM is a widely used measure of patient  
7 activation that has demonstrated sensitivity to health-related outcomes, including health  
8 service use.[55,56]  
9  
10

11 The CHRIS is the health administrative database used by Ontario's publicly-funded home care  
12 providers. It includes client assessments, documents, provider and vendor contracts, billing of  
13 services information, and medical supplies and equipment rental costs.  
14  
15

16 The HCC MRR is an information management system defining a set of data elements that are  
17 reported to the British Columbia Ministry of Health by the regional health authorities. The HCC  
18 MRR captures information on clients, income, and home and community care services.  
19  
20

21 The Client and Referral Management System (CRMS) is a health information system designed to  
22 support client and referral management for clients receiving community-based services from  
23 the regional health boards in Newfoundland. It contains information on client records and  
24 clinical activity.  
25  
26

27 The NACRS contains data from all national hospital-based and community-based ambulatory  
28 care. It is collected and maintained by the Canadian Institute for Health Information (CIHI),  
29 which conducts its own quality assurance procedures to ensure accuracy and completeness.  
30  
31

32 The DAD captures administrative, clinical, and demographic information nationally on hospital  
33 discharges (including deaths, sign-outs, and transfers). It is collected and maintained by CIHI,  
34 which conducts its own quality assurance procedures to ensure accuracy and completeness.  
35  
36

### 37 **Sample Size Calculations**

38 Sample size calculation assumptions:

- 39 • Primary outcome: Time to first unplanned ED visit within 6 months of baseline
  - 40 • Hazard ratio of 0.75
  - 41 • Mean size of a home care caseload: 120 clients
  - 42 • Mean prevalence of DIVERT target group in each caseload: 30%
  - 43 • Expected recruitment over 6 months per caseload: 30
  - 44 • Mean cluster size: 30
  - 45 • Allocation: 1:2 (intervention: control)
- 46  
47  
48  
49  
50

51 Simulations using retrospective secondary data sources were undertaken to explore the power  
52 of a hypothetical DIVERT-CARE trial conducted in the HNH B LHIN region of Ontario from  
53 December 2015 to June 2016. The simulations found that 36 HNH B home care caseloads  
54 randomized at a 1:2 intervention to control ratio could expect to enroll 1,100 clients across  
55  
56  
57  
58  
59

1  
2  
3 seven months. The simulation linked clients to their actual ED utilization records and extended  
4 the time to first ED visit figures for clients in 12 randomly selected intervention caseloads to  
5 achieve a hazard ratio of 0.75, a figure chosen to be more conservative than the pilot study but  
6 still clinically significant. The overall event rate was 35.5% in the intervention group and 44.8%  
7 in the control. The median time to first visit was 88 days in the intervention group and 75 days  
8 in the control. The power of the simulated DIVERT trial was 81.3% with a two-sided alpha of  
9 0.05. Simulations with a hazard ratio of 0.80 yielded a power of 60.1%. The intraclass  
10 correlation coefficient (ICC) was estimated to be 0.005.  
11  
12  
13

14 Based on the simulations the target sample size for the trial will be 1,100 clients, which will  
15 yield an approximate power of 81% for a hazard ratio of 0.75 and 60% for a hazard ratio of 0.80.  
16  
17

### 18 **Statistical Analyses**

19 Descriptive analyses will compare the treatment groups and sites on baseline demographic and  
20 clinical characteristics. Statistics on compliance, censoring, and follow-up times will also be  
21 presented.  
22  
23

24 The primary outcome will be assessed through a multi-level proportional hazards model on an  
25 intent-to-treat basis. The dependent variable will be days until first unplanned ED visit,  
26 censored at date of home care discharge for any reason. Caseload and partner site will be  
27 included as nested random effects. Both unadjusted and adjusted results will be reported. For  
28 adjusted analysis, DIVERT subgroup, age, and sex will be included as time-independent fixed  
29 effects. The hazard ratio, 95% confidence interval, and p-value will be reported for the  
30 treatment group effect and covariates when applicable. A two-sided alpha level of 0.05 will be  
31 used to judge statistical significance.  
32  
33  
34

35 The assumption of proportionality of hazards across treatment groups will be evaluated by a  
36 visual inspection of the hazard curves and statistical testing of a time-dependent treatment  
37 group effect. If the hazard curves cross or the time-dependent treatment group effect is  
38 significant ( $p < 0.05$ ) then primary analysis will be modified to consider treatment group as a  
39 time-varying effect.  
40  
41

42 The economic evaluation will examine total care costs, controlling for length of stay, between  
43 treatment groups to compare incremental costs to incremental effects (i.e., cost per ED visit  
44 averted). Total care costs are defined as direct costs incurred by the home care provider in the  
45 provision of home care services, including: human resources and equipment. We will use a  
46 micro-costing approach based on the listed/billed service cost consumed by each patient.  
47  
48  
49

50 The other outcomes will be evaluated by multi-level generalized linear models. Four-month and  
51 six-month changes in PAM, HRQOL, number of symptoms, number of ED visits, and number of  
52 unplanned hospitalizations will be the respective dependent variables. Caseload and partner  
53 site will be included as nested random effects. Both unadjusted and adjusted results will be  
54 reported. For adjusted analysis DIVERT subgroup, age, and sex will be included as fixed effects.  
55 Unit change and rate ratios, with their associated 95% confidence interval and p-values, will be  
56  
57  
58  
59

1  
2  
3 reported for the treatment group effect and covariates as applicable. A two-sided alpha level of  
4 0.05 will be used to judge statistical significance.  
5

6  
7 Model assumptions will be evaluated by a visual inspection of residuals and the sensitivity of  
8 the results to the use of a heteroskedastic-robust variance estimator. If evidence of departure  
9 from model assumptions is present, then the analysis will be modified to utilize an empirical  
10 variance estimator.  
11

### 12 13 **Patient and Public Involvement**

14 The intervention, comprehensively described elsewhere [40], was developed based on the  
15 input from clients/families and health professionals in a series of three in-person stakeholder  
16 meetings held in late 2013 and early 2014. The pilot of the study methodology was conducted  
17 in 2014 with the collaboration, input, and funding from a regional, public-sector, home care  
18 provider (HNHB LHIN). Participating clients and health professionals provided input into the  
19 intervention (and study design for health professionals) through telephone interviews using a  
20 structured questionnaire focused on the perceived benefit and utility of the interventions,  
21 overall satisfaction, and areas for improvement. The outcomes of the pilot study were featured  
22 in the home care providers annual report to the community.  
23  
24

25  
26 The present protocol, based on the aforementioned pilot study, received input from health  
27 professionals in each participating region through a series of in-person planning meetings in  
28 mid-2017. The general public was engaged in one region through a local radio program.  
29 Adaptations and modifications to the intervention in each region to account for their unique  
30 health service context will be described in a forthcoming implementation publication. The  
31 experience of participating clients and health professionals will be investigated in a program  
32 evaluation and qualitative study to be conducted in parallel. The results of the trial are  
33 expected to be released to the study participants and public through regional public reports.  
34  
35  
36  
37

### 38 39 **ETHICS AND DISSEMINATION**

#### 40 **Harm**

41 This trial is unlikely to cause additional risk of harm since the various components of the  
42 intervention are already available from home care agencies and service providers, though rarely  
43 offered in the standard care plan. Direct risks to the health of the client are minimal as none of  
44 the components of the intervention are novel interventions. Each element of the intervention  
45 has been shown to be safe individually. Clients in the control group will continue to receive  
46 their usual care, while clients in the intervention group will receive usual care plus increased  
47 access to additional home care services defined by the cardio-respiratory treatment model. A  
48 Data Monitoring and Ethics (or equivalent) Committee was not required, and formal stopping  
49 rules or interim analyses are not planned.  
50  
51

#### 52 53 **Ethical approval**

54  
55  
56  
57  
58  
59  
60

1  
2  
3 We have received ethics approval from the Hamilton-Integrated Research Ethics Board, Health  
4 Research Ethics Authority for Western Health, and the Clinical Research Ethics Board for  
5 Vancouver Island.  
6  
7

### 8 **Results dissemination**

9 We aim to make the results of this study public through peer-reviewed publications, clinical  
10 trial registry, thesis manuscripts, conference publications, and notifications to our trial partners,  
11 who will include the findings in their regular newsletters and annual reports to clients, partners,  
12 and government.  
13  
14

### 15 **DISCUSSION**

16 In summary, this pragmatic, cluster-randomized, multi-center superiority trial will investigate  
17 the effectiveness of a cardio-respiratory disease management model in a targeted home care  
18 client population, with case finding occurring using the DIVERT scale[19]. By offering a person-  
19 centered, multi-component cardio-respiratory management model to home care clients at the  
20 highest levels of risk,[40] we hope to determine if unplanned ED visits are postponed, clients  
21 have increased activation in their care, symptoms are reduced, and that the care model is cost-  
22 effective.  
23  
24  
25

26 This pragmatic trial will inform how multi-component cardio-respiratory care interventions are  
27 received as they are delivered in real-world conditions. Historically, trials investigating  
28 community programs have excluded frail seniors who would be at high-risk of ED services.  
29 Additionally, other trials have tended to focus on post-acute care and have not targeted high-  
30 risk clients when assessing community-based chronic disease management interventions.  
31  
32  
33

34 The need for appropriate and targeted supportive chronic disease management is a clear and  
35 compelling health services issue, and is reflected in new provincial government investments  
36 into the sector. This trial will be an important precedent around the creation of more upstream  
37 approaches to care for home-care clients that help to take further pressure of hospitals and EDs  
38 that are already facing issues of overcrowding across Canada.  
39  
40  
41  
42  
43  
44  
45  
46  
47  
48  
49  
50  
51  
52  
53  
54  
55  
56  
57  
58  
59  
60

### Author Contributions

APC is the principal investigator and led the conceptualization and design of the protocol, drafted, and revised the manuscript. CS, AJ, DD, MJ, and GC made contributions to the design and implementation of the study, and supported the manuscript. GA, CB, VB, SB, DF, PH, GH, JH, LL, RM, LM, and SS are co-investigators that contributed to the design of the study, and revised the manuscript. JD, TP, JR, RG, DM, and DH are trial partners who contributed to the design and implementation of the study. All authors critically revised the manuscript and approved the final version of this manuscript.

### Competing interests

It should be noted that DHF has a proprietary interest in Health Utilities Incorporated, Dundas, Ontario, Canada. HUInc distributes copyrighted Health Utilities Index (HUI) materials and provides methodological advice on the use of the HUI. All others author have no competing interests.

### Funding statement

Andrew Costa is supported by the Schlegel Chair in Clinical Epidemiology & Aging, McMaster University. This work was supported by Canadian Institutes of Health Research (CIHR; grant number 148933) and pilot funding from the Canadian Frailty Network (CFN; grant number 2015-15PB). This funding source has no role in the design of the study and will not have a role in its execution, analyses, interpretation of data, or decision to submit results.

### Acknowledgements

The authors wish to thank the regional home care providers for their leadership and involvement in the study: Hamilton-Niagara-Haldimand-Brant Local Health Integration Network (HNHB LHIN) in Ontario, Western Health in Newfoundland, and Island Health in British Columbia.

## REFERENCES

- 1 Wilkins K. Government-subsidized Home Care. Ottawa, ON: : Statistics Canada 2006. <https://www.ncbi.nlm.nih.gov/pubmed/17111593> (accessed 22 Aug 2018).
- 2 Seggewiss K. Variations in home care programs across Canada demonstrate need for national standards and pan-Canadian program. *CMAJ* 2009;**180**:E90–2. doi:10.1503/cmaj.090819
- 3 Health Council of Canada. Seniors in need, caregivers in distress: What are home care priorities for seniors in Canada? 2012. [http://www.carp.ca/wp-content/uploads/2012/04/HCC\\_HomeCare\\_2d.pdf](http://www.carp.ca/wp-content/uploads/2012/04/HCC_HomeCare_2d.pdf) (accessed 24 May 2018).
- 4 Jones A, Schumacher C, Bronskill SE, *et al*. The association between home care visits and same-day emergency department use: a case-crossover study. *Can Med Assoc J* 2018;**190**:E525–31. doi:10.1503/cmaj.170892
- 5 Gray LC, Peel NM, Costa AP, *et al*. Profiles of Older Patients in the Emergency Department: Findings From the interRAI Multinational Emergency Department Study. *Ann Emerg Med* 2013;**62**:467–74. doi:10.1016/j.annemergmed.2013.05.008
- 6 Salvi F, Morichi V, Grilli A, *et al*. The elderly in the emergency department: a critical review of problems and solutions. *Intern Emerg Med* 2007;**2**:292–301. doi:10.1007/s11739-007-0081-3
- 7 Wagner EH, Davis C, Schaefer J, *et al*. A Survey of Leading Chronic Disease Management Programs: Are They Consistent with the Literature?: *Manag Care Q* 1999;**7**:56–66.
- 8 Wagner EH. Chronic disease management: what will it take to improve care for chronic illness? *Eff Clin Pract* 1998;**1**:2–4.
- 9 Wagner EH. More than a case manager. *Ann Intern Med* 1998;**129**:654–6.
- 10 Becker DM, Raqueño JV, Yook RM, *et al*. Nurse-mediated cholesterol management compared with enhanced primary care in siblings of individuals with premature coronary disease. *Arch Intern Med* 1998;**158**:1533–9.
- 11 Aubert RE, Herman WH, Waters J, *et al*. Nurse case management to improve glycemic control in diabetic patients in a health maintenance organization. A randomized, controlled trial. *Ann Intern Med* 1998;**129**:605–12.
- 12 Von Korff M, Gruman J, Schaefer J, *et al*. Collaborative management of chronic illness. *Ann Intern Med* 1997;**127**:1097–102.

- 13 Weinberger M, Oddone EZ, Henderson WG. Does increased access to primary care reduce hospital readmissions? Veterans Affairs Cooperative Study Group on Primary Care and Hospital Readmission. *N Engl J Med* 1996;**334**:1441–7. doi:10.1056/NEJM199605303342206
- 14 Wasson J, Gaudette C, Whaley F, *et al.* Telephone care as a substitute for routine clinic follow-up. *JAMA* 1992;**267**:1788–93.
- 15 Mukamel DB, Chou CC, Zimmer JG, *et al.* The effect of accurate patient screening on the cost-effectiveness of case management programs. *The Gerontologist* 1997;**37**:777–84.
- 16 Stuck AE, Elkuch P, Dapp U, *et al.* Feasibility and yield of a self-administered questionnaire for health risk appraisal in older people in three European countries. *Age Ageing* 2002;**31**:463–7.
- 17 Cardiac Care Network of Ontario. Strategy for Community Management of Heart Failure in Ontario. 2014.
- 18 Health Quality Ontario. Key Observations: 2014-15 Quality Improvement Plans Community Care Access Centres. Toronto, ON: : Queen’s Printer for Ontario 2014.
- 19 Costa A, Hirdes JP, Bell CM, *et al.* Derivation and Validation of the Detection of Indicators and Vulnerabilities for Emergency Room Trips Scale for Classifying the Risk of Emergency Department Use in Frail Community-Dwelling Older Adults. *J Am Geriatr Soc* 2015;**63**:763–9. doi:10.1111/jgs.13336
- 20 Tsisis P. Chronic disease management and the home-care alternative in Ontario, Canada. *Health Serv Manage Res* 2009;**22**:136–9. doi:10.1258/hsmr.2009.009002
- 21 Grimshaw JM, Shirran L, Thomas R, *et al.* Changing provider behavior: an overview of systematic reviews of interventions. *Med Care* 2001;**39**:II2-45.
- 22 American Geriatrics Society Expert Panel on Person-Centered Care. Person-Centered Care: A Definition and Essential Elements. *J Am Geriatr Soc* 2016;**64**:15–8. doi:10.1111/jgs.13866
- 23 Ministry of Health and Long-Term Care. 2015 Minister’s Medal Winners. 2016.[http://www.health.gov.on.ca/en/pro/programs/transformation/minister\\_medal\\_2015.aspx](http://www.health.gov.on.ca/en/pro/programs/transformation/minister_medal_2015.aspx) (accessed 18 Feb 2018).
- 24 Costa A, Haughton D, Heckman G, *et al.* The DIVERT-CARE catalyst trial: Targeted chronic-disease management for home care clients. *Innov Aging* 2017;**1**:322–3. doi:10.1093/geroni/igx004.1190
- 25 Dhalla IA, O’Brien T, Morra D, *et al.* Effect of a postdischarge virtual ward on readmission or death for high-risk patients: a randomized clinical trial. *JAMA* 2014;**312**:1305–12. doi:10.1001/jama.2014.11492



- 1  
2  
3 26 Van Spall HGC, Lee SF, Xie F, *et al.* Effect of Patient-Centered Transitional Care Services on  
4 Clinical Outcomes in Patients Hospitalized for Heart Failure: The PACT-HF Randomized  
5 Clinical Trial. *J Am Med Assoc* 2019;**321**:753–61. doi:10.1001/jama.2019.0710  
6  
7  
8 27 Beswick AD, Rees K, Dieppe P, *et al.* Complex interventions to improve physical function and  
9 maintain independent living in elderly people: a systematic review and meta-analysis.  
10 *Lancet* 2008;**371**:725–35. doi:10.1016/S0140-6736(08)60342-6  
11  
12 28 Schwartz D, Lellouch J. Explanatory and pragmatic attitudes in therapeutical trials. *J Clin*  
13 *Epidemiol* 2009;**62**:499–505. doi:10.1016/j.jclinepi.2009.01.012  
14  
15  
16 29 Rothwell PM. External validity of randomised controlled trials: “to whom do the results of  
17 this trial apply?” *Lancet Lond Engl* 2005;**365**:82–93. doi:10.1016/S0140-6736(04)17670-8  
18  
19  
20 30 Dickinson LM, Beaty B, Fox C, *et al.* Pragmatic Cluster Randomized Trials Using Covariate  
21 Constrained Randomization: A Method for Practice-based Research Networks (PBRNs). *J Am*  
22 *Board Fam Med* 2015;**28**:663–72. doi:10.3122/jabfm.2015.05.150001  
23  
24 31 Hemming K, Haines TP, Chilton PJ, *et al.* The stepped wedge cluster randomised trial:  
25 rationale, design, analysis, and reporting. *BMJ* 2015;**350**:h391.  
26  
27  
28 32 Anderson GL, Burns CJ, Larsen J, *et al.* Use of administrative data to increase the practicality  
29 of clinical trials: Insights from the Women’s Health Initiative. *Clin Trials* 2016;**13**:519–26.  
30 doi:10.1177/1740774516656579  
31  
32 33 Richards SH, Coast J, Peters TJ. Patient-reported use of health service resources compared  
33 with information from health providers. *Health Soc Care Community* 2003;**11**:510–8.  
34  
35  
36 34 Richard E, Van den Heuvel E, Moll van Charante EP, *et al.* Prevention of dementia by  
37 intensive vascular care (PreDIVA): a cluster-randomized trial in progress. *Alzheimer Dis*  
38 *Assoc Disord* 2009;**23**:198–204. doi:10.1097/WAD.0b013e31819783a4  
39  
40  
41 35 Kaczorowski J, Chambers LW, Dolovich L, *et al.* Improving cardiovascular health at  
42 population level: 39 community cluster randomised trial of Cardiovascular Health  
43 Awareness Program (CHAP). *BMJ* 2011;**342**:d442.  
44  
45  
46 36 Steventon A, Bardsley M, Billings J, *et al.* Effect of telehealth on use of secondary care and  
47 mortality: findings from the Whole System Demonstrator cluster randomised trial. *BMJ*  
48 2012;**344**:e3874.  
49  
50  
51 37 Evans CD, Eurich DT, Taylor JG, *et al.* A pragmatic cluster randomized trial evaluating the  
52 impact of a community pharmacy intervention on statin adherence: rationale and design of  
53 the Community Pharmacy Assisting in Total Cardiovascular Health (CPATCH) study. *Trials*  
54 2010;**11**:76. doi:10.1186/1745-6215-11-76  
55  
56  
57  
58  
59  
60

- 1  
2  
3 38 Chan A-W, Tetzlaff JM, Altman DG, *et al.* SPIRIT 2013 Statement: Defining Standard Protocol  
4 Items for Clinical Trials. *Ann Intern Med* 2013;**158**:200. doi:10.7326/0003-4819-158-3-  
5 201302050-00583  
6  
7  
8 39 Schulz KF, Altman DG, Moher D, *et al.* CONSORT 2010 Statement: updated guidelines for  
9 reporting parallel group randomised trials. *Trials* 2010;**11**:32. doi:10.1186/1745-6215-11-32  
10  
11 40 Schumacher C, Lackey C, Haughton D, *et al.* A chronic disease management model for home  
12 care patients with cardio-respiratory symptoms: the DIVERT-CARE Intervention. *Can J*  
13 *Cardiovasc Nurs* 2018;**28**:18–26.  
14  
15  
16 41 Wodchis WP, Hirdes JP, Feeny DH. Health-related quality of life measure based on the  
17 minimum data set. *Int J Technol Assess Health Care* 2003;**19**:490–506.  
18  
19  
20 42 Jones A, Feeny D, Costa AP. Longitudinal construct validity of the minimum data set health  
21 status index. *Health Qual Life Outcomes* 2018;**16**:102. doi:10.1186/s12955-018-0932-9  
22  
23 43 Canadian Institutes of Health Research, Natural Sciences and Engineering Research Council  
24 of Canada, Social Sciences and Humanities Research Council of Canada. Tri-council policy  
25 statement: Ethical conduct for research involving humans 2014. 2014.  
26 [http://www.pre.ethics.gc.ca/pdf/eng/tcps2-2014/TCPS\\_2\\_FINAL\\_Web.pdf](http://www.pre.ethics.gc.ca/pdf/eng/tcps2-2014/TCPS_2_FINAL_Web.pdf)  
27  
28  
29 44 Medical Research Council. Cluster randomised trials: Methodological and ethical  
30 considerations. London: Medical Research Council 2002.  
31  
32 45 Howlett JG, Chan M, Ezekowitz JA, *et al.* The Canadian Cardiovascular Society Heart Failure  
33 Companion: Bridging Guidelines to Your Practice. *Can J Cardiol* 2016;**32**:296–310.  
34 doi:10.1016/j.cjca.2015.06.019  
35  
36  
37 46 O'Donnell DE, Hernandez P, Kaplan A, *et al.* Canadian Thoracic Society recommendations  
38 for management of chronic obstructive pulmonary disease - 2008 update - highlights for  
39 primary care. *Can Respir J* 2008;**15 Suppl A**:1A-8A. doi:10.1155/2008/641965  
40  
41  
42 47 Beckett CD, Kipnis G. Collaborative communication: integrating SBAR to improve  
43 quality/patient safety outcomes. *J Healthc Qual* 2009;**31**:19–28.  
44  
45  
46 48 Wagner EH. Population-based management of diabetes care. *Patient Educ Couns*  
47 1995;**26**:225–30.  
48  
49 49 Morris JN, Fries BE, Steel K, *et al.* Comprehensive Clinical Assessment in Community Setting:  
50 Applicability of the MDS-HC. *J Am Geriatr Soc* 1997;**45**:1017–24. doi:10.1111/j.1532-  
51 5415.1997.tb02975.x  
52  
53 50 Kwan C-W, Chi I, Lam T-P, *et al.* Validation of Minimum Data Set for Home Care Assessment  
54 Instrument (MDS-HC) for Hong Kong Chinese Elders. *Clin Gerontol* 2000;**21**:35–48.  
55 doi:10.1300/J018v21n04\_04  
56  
57  
58  
59

- 1  
2  
3 51 Leung AC, Liu CP, Tsui LL, *et al.* The use of the Minimum Data Set. Home Care in a case  
4 management project in Hong Kong. *Care Manag J* 2001;**3**:8–13.  
5  
6  
7 52 Landi F, Tua E, Onder G, *et al.* Minimum Data Set for Home Care: A Valid Instrument to  
8 Assess Frail Older People Living in the Community. *Med Care* 2000;**38**:1184–90.  
9  
10 53 Hirdes JP, Ljunggren G, Morris JN, *et al.* Reliability of the interRAI suite of assessment  
11 instruments: a 12-country study of an integrated health information system. *BMC Health*  
12 *Serv Res* 2008;**8**:277. doi:10.1186/1472-6963-8-277  
13  
14 54 Hibbard JH, Stockard J, Mahoney ER, *et al.* Development of the Patient Activation Measure  
15 (PAM): Conceptualizing and Measuring Activation in Patients and Consumers. *Health Serv*  
16 *Res* 2004;**39**:1005–26. doi:10.1111/j.1475-6773.2004.00269.x  
17  
18 55 Mosen DM, Schmittdiel J, Hibbard J, *et al.* Is patient activation associated with outcomes of  
19 care for adults with chronic conditions? *J Ambulatory Care Manage* 2007;**30**:21–9.  
20  
21 56 Greene J, Hibbard JH. Why Does Patient Activation Matter? An Examination of the  
22 Relationships Between Patient Activation and Health-Related Outcomes. *J Gen Intern Med*  
23 2012;**27**:520–6. doi:10.1007/s11606-011-1931-2  
24  
25  
26  
27  
28  
29  
30  
31  
32  
33  
34  
35  
36  
37  
38  
39  
40  
41  
42  
43  
44  
45  
46  
47  
48  
49  
50  
51  
52  
53  
54  
55  
56  
57  
58  
59  
60

1  
2  
3  
4  
5  
6  
7  
8  
9  
10  
11  
12  
13  
14  
15  
16  
17  
18  
19  
20  
21  
22  
23  
24  
25  
26  
27  
28  
29  
30  
31  
32  
33  
34  
35  
36  
37  
38  
39  
40  
41  
42  
43  
44  
45  
46  
47  
48  
49  
50  
51  
52  
53  
54  
55  
56  
57  
58  
59  
60



Figure 1: Caseload Randomization Schematic

368x222mm (300 x 300 DPI)

1  
2  
3  
4  
5  
6  
7  
8  
9  
10  
11  
12  
13  
14  
15  
16  
17  
18  
19  
20  
21  
22  
23  
24  
25  
26  
27  
28  
29  
30  
31  
32  
33  
34  
35  
36  
37  
38  
39  
40  
41  
42  
43  
44  
45  
46  
47  
48  
49  
50  
51  
52  
53  
54  
55  
56  
57  
58  
59  
60

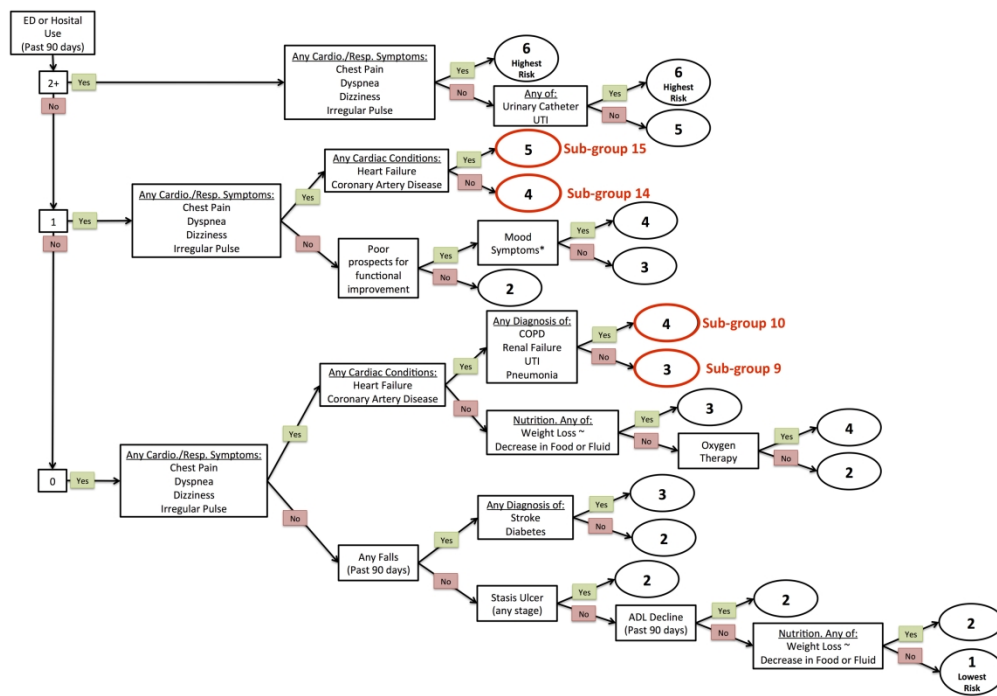

Figure 2: DIVERT Scale Target Groups

254x175mm (300 x 300 DPI)

# Reporting checklist for protocol of a clinical trial.

Based on the SPIRIT guidelines.

## Instructions to authors

Complete this checklist by entering the page numbers from your manuscript where readers will find each of the items listed below.

Your article may not currently address all the items on the checklist. Please modify your text to include the missing information. If you are certain that an item does not apply, please write "n/a" and provide a short explanation.

Upload your completed checklist as an extra file when you submit to a journal.

In your methods section, say that you used the SPIRIT reporting guidelines, and cite them as:

Chan A-W, Tetzlaff JM, Altman DG, Laupacis A, Gøtzsche PC, Krleža-Jerić K, Hróbjartsson A, Mann H, Dickersin K, Berlin J, Doré C, Parulekar W, Summerskill W, Groves T, Schulz K, Sox H, Rockhold FW, Rennie D, Moher D. SPIRIT 2013 Statement: Defining standard protocol items for clinical trials. *Ann Intern Med.* 2013;158(3):200-207

|                                             |     | Reporting Item                                                                                               | Page Number |
|---------------------------------------------|-----|--------------------------------------------------------------------------------------------------------------|-------------|
| Title                                       | #1  | Descriptive title identifying the study design, population, interventions, and, if applicable, trial acronym | 1           |
| Trial registration                          | #2a | Trial identifier and registry name. If not yet registered, name of intended registry                         | 3           |
| Trial registration: data set                | #2b | All items from the World Health Organization Trial Registration Data Set                                     | 7-8         |
| Protocol version                            | #3  | Date and version identifier                                                                                  | 7           |
| Funding                                     | #4  | Sources and types of financial, material, and other support                                                  | 17          |
| Roles and responsibilities: contributorship | #5a | Names, affiliations, and roles of protocol contributors                                                      | 17          |
| Roles and responsibilities:                 | #5b | Name and contact information for the trial sponsor                                                           | 17          |

|    |                      |      |                                                                          |    |
|----|----------------------|------|--------------------------------------------------------------------------|----|
| 1  | sponsor contact      |      |                                                                          |    |
| 2  | information          |      |                                                                          |    |
| 3  |                      |      |                                                                          |    |
| 4  | Roles and            | #5c  | Role of study sponsor and funders, if any, in study design;              | 17 |
| 5  | responsibilities:    |      | collection, management, analysis, and interpretation of data; writing    |    |
| 6  | sponsor and funder   |      | of the report; and the decision to submit the report for publication,    |    |
| 7  |                      |      | including whether they will have ultimate authority over any of these    |    |
| 8  |                      |      | activities                                                               |    |
| 9  |                      |      |                                                                          |    |
| 10 |                      |      |                                                                          |    |
| 11 |                      |      |                                                                          |    |
| 12 | Roles and            | #5d  | Composition, roles, and responsibilities of the coordinating centre,     | 17 |
| 13 | responsibilities:    |      | steering committee, endpoint adjudication committee, data                |    |
| 14 | committees           |      | management team, and other individuals or groups overseeing the          |    |
| 15 |                      |      | trial, if applicable (see Item 21a for data monitoring committee)        |    |
| 16 |                      |      |                                                                          |    |
| 17 |                      |      |                                                                          |    |
| 18 |                      |      |                                                                          |    |
| 19 | Background and       | #6a  | Description of research question and justification for undertaking the   | 5  |
| 20 | rationale            |      | trial, including summary of relevant studies (published and              |    |
| 21 |                      |      | unpublished) examining benefits and harms for each intervention          |    |
| 22 |                      |      |                                                                          |    |
| 23 |                      |      |                                                                          |    |
| 24 | Background and       | #6b  | Explanation for choice of comparators                                    | 9  |
| 25 | rationale: choice of |      |                                                                          |    |
| 26 | comparators          |      |                                                                          |    |
| 27 |                      |      |                                                                          |    |
| 28 |                      |      |                                                                          |    |
| 29 | Objectives           | #7   | Specific objectives or hypotheses                                        | 8  |
| 30 |                      |      |                                                                          |    |
| 31 |                      |      |                                                                          |    |
| 32 | Trial design         | #8   | Description of trial design including type of trial (eg, parallel group, | 6  |
| 33 |                      |      | crossover, factorial, single group), allocation ratio, and framework     |    |
| 34 |                      |      | (eg, superiority, equivalence, non-inferiority, exploratory)             |    |
| 35 |                      |      |                                                                          |    |
| 36 |                      |      |                                                                          |    |
| 37 | Study setting        | #9   | Description of study settings (eg, community clinic, academic            | 6  |
| 38 |                      |      | hospital) and list of countries where data will be collected. Reference  |    |
| 39 |                      |      | to where list of study sites can be obtained                             |    |
| 40 |                      |      |                                                                          |    |
| 41 |                      |      |                                                                          |    |
| 42 | Eligibility criteria | #10  | Inclusion and exclusion criteria for participants. If applicable,        | 9  |
| 43 |                      |      | eligibility criteria for study centres and individuals who will perform  |    |
| 44 |                      |      | the interventions (eg, surgeons, psychotherapists)                       |    |
| 45 |                      |      |                                                                          |    |
| 46 |                      |      |                                                                          |    |
| 47 |                      |      |                                                                          |    |
| 48 | Interventions:       | #11a | Interventions for each group with sufficient detail to allow             | 10 |
| 49 | description          |      | replication, including how and when they will be administered            |    |
| 50 |                      |      |                                                                          |    |
| 51 |                      |      |                                                                          |    |
| 52 | Interventions:       | #11b | Criteria for discontinuing or modifying allocated interventions for a    | 10 |
| 53 | modifications        |      | given trial participant (eg, drug dose change in response to harms,      |    |
| 54 |                      |      | participant request, or improving / worsening disease)                   |    |
| 55 |                      |      |                                                                          |    |
| 56 |                      |      |                                                                          |    |
| 57 | Interventions:       | #11c | Strategies to improve adherence to intervention protocols, and any       | 11 |
| 58 | adherence            |      | procedures for monitoring adherence (eg, drug tablet return;             |    |
| 59 |                      |      |                                                                          |    |
| 60 |                      |      |                                                                          |    |

|    |                      |                   |                                                                        |
|----|----------------------|-------------------|------------------------------------------------------------------------|
|    |                      | laboratory tests) |                                                                        |
| 1  |                      |                   |                                                                        |
| 2  |                      |                   |                                                                        |
| 3  | Interventions:       | #11d              | Relevant concomitant care and interventions that are permitted or      |
| 4  | concomitant care     |                   | prohibited during the trial                                            |
| 5  |                      |                   |                                                                        |
| 6  | Outcomes             | #12               | Primary, secondary, and other outcomes, including the specific         |
| 7  |                      |                   | measurement variable (eg, systolic blood pressure), analysis metric    |
| 8  |                      |                   | (eg, change from baseline, final value, time to event), method of      |
| 9  |                      |                   | aggregation (eg, median, proportion), and time point for each          |
| 10 |                      |                   | outcome. Explanation of the clinical relevance of chosen efficacy      |
| 11 |                      |                   | and harm outcomes is strongly recommended                              |
| 12 |                      |                   |                                                                        |
| 13 |                      |                   |                                                                        |
| 14 |                      |                   |                                                                        |
| 15 |                      |                   |                                                                        |
| 16 | Participant timeline | #13               | Time schedule of enrolment, interventions (including any run-ins       |
| 17 |                      |                   | and washouts), assessments, and visits for participants. A schematic   |
| 18 |                      |                   | diagram is highly recommended (see Figure)                             |
| 19 |                      |                   |                                                                        |
| 20 |                      |                   |                                                                        |
| 21 | Sample size          | #14               | Estimated number of participants needed to achieve study objectives    |
| 22 |                      |                   | and how it was determined, including clinical and statistical          |
| 23 |                      |                   | assumptions supporting any sample size calculations                    |
| 24 |                      |                   |                                                                        |
| 25 |                      |                   |                                                                        |
| 26 | Recruitment          | #15               | Strategies for achieving adequate participant enrolment to reach       |
| 27 |                      |                   | target sample size                                                     |
| 28 |                      |                   |                                                                        |
| 29 |                      |                   |                                                                        |
| 30 | Allocation: sequence | #16a              | Method of generating the allocation sequence (eg, computer-            |
| 31 | generation           |                   | generated random numbers), and list of any factors for stratification. |
| 32 |                      |                   | To reduce predictability of a random sequence, details of any          |
| 33 |                      |                   | planned restriction (eg, blocking) should be provided in a separate    |
| 34 |                      |                   | document that is unavailable to those who enrol participants or        |
| 35 |                      |                   | assign interventions                                                   |
| 36 |                      |                   |                                                                        |
| 37 |                      |                   |                                                                        |
| 38 |                      |                   |                                                                        |
| 39 |                      |                   |                                                                        |
| 40 | Allocation           | #16b              | Mechanism of implementing the allocation sequence (eg, central         |
| 41 | concealment          |                   | telephone; sequentially numbered, opaque, sealed envelopes),           |
| 42 | mechanism            |                   | describing any steps to conceal the sequence until interventions are   |
| 43 |                      |                   | assigned                                                               |
| 44 |                      |                   |                                                                        |
| 45 |                      |                   |                                                                        |
| 46 |                      |                   |                                                                        |
| 47 | Allocation:          | #16c              | Who will generate the allocation sequence, who will enrol              |
| 48 | implementation       |                   | participants, and who will assign participants to interventions        |
| 49 |                      |                   |                                                                        |
| 50 |                      |                   |                                                                        |
| 51 | Blinding (masking)   | #17a              | Who will be blinded after assignment to interventions (eg, trial       |
| 52 |                      |                   | participants, care providers, outcome assessors, data analysts), and   |
| 53 |                      |                   | how                                                                    |
| 54 |                      |                   |                                                                        |
| 55 |                      |                   |                                                                        |
| 56 | Blinding (masking):  | #17b              | If blinded, circumstances under which unblinding is permissible, and   |
| 57 | emergency            |                   | procedure for revealing a participant's allocated intervention during  |
| 58 |                      |                   |                                                                        |
| 59 |                      |                   |                                                                        |
| 60 |                      |                   |                                                                        |



|    |                        |      |                                                                         |    |
|----|------------------------|------|-------------------------------------------------------------------------|----|
| 1  | unblinding             |      | the trial                                                               |    |
| 2  |                        |      |                                                                         |    |
| 3  | Data collection plan   | #18a | Plans for assessment and collection of outcome, baseline, and other     | 13 |
| 4  |                        |      | trial data, including any related processes to promote data quality     |    |
| 5  |                        |      | (eg, duplicate measurements, training of assessors) and a description   |    |
| 6  |                        |      | of study instruments (eg, questionnaires, laboratory tests) along with  |    |
| 7  |                        |      | their reliability and validity, if known. Reference to where data       |    |
| 8  |                        |      | collection forms can be found, if not in the protocol                   |    |
| 9  |                        |      |                                                                         |    |
| 10 |                        |      |                                                                         |    |
| 11 |                        |      |                                                                         |    |
| 12 | Data collection plan:  | #18b | Plans to promote participant retention and complete follow-up,          | 13 |
| 13 | retention              |      | including list of any outcome data to be collected for participants     |    |
| 14 |                        |      | who discontinue or deviate from intervention protocols                  |    |
| 15 |                        |      |                                                                         |    |
| 16 |                        |      |                                                                         |    |
| 17 | Data management        | #19  | Plans for data entry, coding, security, and storage, including any      | 13 |
| 18 |                        |      | related processes to promote data quality (eg, double data entry;       |    |
| 19 |                        |      | range checks for data values). Reference to where details of data       |    |
| 20 |                        |      | management procedures can be found, if not in the protocol              |    |
| 21 |                        |      |                                                                         |    |
| 22 |                        |      |                                                                         |    |
| 23 |                        |      |                                                                         |    |
| 24 | Statistics: outcomes   | #20a | Statistical methods for analysing primary and secondary outcomes.       | 14 |
| 25 |                        |      | Reference to where other details of the statistical analysis plan can   |    |
| 26 |                        |      | be found, if not in the protocol                                        |    |
| 27 |                        |      |                                                                         |    |
| 28 |                        |      |                                                                         |    |
| 29 |                        |      |                                                                         |    |
| 30 | Statistics: additional | #20b | Methods for any additional analyses (eg, subgroup and adjusted          | 14 |
| 31 | analyses               |      | analyses)                                                               |    |
| 32 |                        |      |                                                                         |    |
| 33 |                        |      |                                                                         |    |
| 34 | Statistics: analysis   | #20c | Definition of analysis population relating to protocol non-adherence    | 14 |
| 35 | population and         |      | (eg, as randomised analysis), and any statistical methods to handle     |    |
| 36 | missing data           |      | missing data (eg, multiple imputation)                                  |    |
| 37 |                        |      |                                                                         |    |
| 38 |                        |      |                                                                         |    |
| 39 | Data monitoring:       | #21a | Composition of data monitoring committee (DMC); summary of its          | 15 |
| 40 | formal committee       |      | role and reporting structure; statement of whether it is independent    |    |
| 41 |                        |      | from the sponsor and competing interests; and reference to where        |    |
| 42 |                        |      | further details about its charter can be found, if not in the protocol. |    |
| 43 |                        |      | Alternatively, an explanation of why a DMC is not needed                |    |
| 44 |                        |      |                                                                         |    |
| 45 |                        |      |                                                                         |    |
| 46 |                        |      |                                                                         |    |
| 47 | Data monitoring:       | #21b | Description of any interim analyses and stopping guidelines,            | 15 |
| 48 | interim analysis       |      | including who will have access to these interim results and make the    |    |
| 49 |                        |      | final decision to terminate the trial                                   |    |
| 50 |                        |      |                                                                         |    |
| 51 |                        |      |                                                                         |    |
| 52 |                        |      |                                                                         |    |
| 53 | Harms                  | #22  | Plans for collecting, assessing, reporting, and managing solicited and  | 15 |
| 54 |                        |      | spontaneously reported adverse events and other unintended effects      |    |
| 55 |                        |      | of trial interventions or trial conduct                                 |    |
| 56 |                        |      |                                                                         |    |
| 57 |                        |      |                                                                         |    |
| 58 | Auditing               | #23  | Frequency and procedures for auditing trial conduct, if any, and        | 15 |
| 59 |                        |      |                                                                         |    |
| 60 |                        |      |                                                                         |    |

|    |                       |                                                                            |     |
|----|-----------------------|----------------------------------------------------------------------------|-----|
|    |                       | whether the process will be independent from investigators and the sponsor |     |
| 1  |                       |                                                                            |     |
| 2  |                       |                                                                            |     |
| 3  |                       |                                                                            |     |
| 4  | Research ethics       | #24 Plans for seeking research ethics committee / institutional review     | 16  |
| 5  | approval              | board (REC / IRB) approval                                                 |     |
| 6  |                       |                                                                            |     |
| 7  |                       |                                                                            |     |
| 8  | Protocol amendments   | #25 Plans for communicating important protocol modifications (eg,          | 16  |
| 9  |                       | changes to eligibility criteria, outcomes, analyses) to relevant parties   |     |
| 10 |                       | (eg, investigators, REC / IRBs, trial participants, trial registries,      |     |
| 11 |                       | journals, regulators)                                                      |     |
| 12 |                       |                                                                            |     |
| 13 |                       |                                                                            |     |
| 14 | Consent or assent     | #26a Who will obtain informed consent or assent from potential trial       | 9   |
| 15 |                       | participants or authorised surrogates, and how (see Item 32)               |     |
| 16 |                       |                                                                            |     |
| 17 |                       |                                                                            |     |
| 18 | Consent or assent:    | #26b Additional consent provisions for collection and use of participant   | 9   |
| 19 | ancillary studies     | data and biological specimens in ancillary studies, if applicable          |     |
| 20 |                       |                                                                            |     |
| 21 |                       |                                                                            |     |
| 22 | Confidentiality       | #27 How personal information about potential and enrolled participants     | 16  |
| 23 |                       | will be collected, shared, and maintained in order to protect              |     |
| 24 |                       | confidentiality before, during, and after the trial                        |     |
| 25 |                       |                                                                            |     |
| 26 |                       |                                                                            |     |
| 27 | Declaration of        | #28 Financial and other competing interests for principal investigators    | 17  |
| 28 | interests             | for the overall trial and each study site                                  |     |
| 29 |                       |                                                                            |     |
| 30 |                       |                                                                            |     |
| 31 | Data access           | #29 Statement of who will have access to the final trial dataset, and      | 17  |
| 32 |                       | disclosure of contractual agreements that limit such access for            |     |
| 33 |                       | investigators                                                              |     |
| 34 |                       |                                                                            |     |
| 35 |                       |                                                                            |     |
| 36 | Ancillary and post    | #30 Provisions, if any, for ancillary and post-trial care, and for         | 9   |
| 37 | trial care            | compensation to those who suffer harm from trial participation             |     |
| 38 |                       |                                                                            |     |
| 39 |                       |                                                                            |     |
| 40 | Dissemination policy: | #31a Plans for investigators and sponsor to communicate trial results to   | 16  |
| 41 | trial results         | participants, healthcare professionals, the public, and other relevant     |     |
| 42 |                       | groups (eg, via publication, reporting in results databases, or other      |     |
| 43 |                       | data sharing arrangements), including any publication restrictions         |     |
| 44 |                       |                                                                            |     |
| 45 |                       |                                                                            |     |
| 46 |                       |                                                                            |     |
| 47 | Dissemination policy: | #31b Authorship eligibility guidelines and any intended use of             | 16  |
| 48 | authorship            | professional writers                                                       |     |
| 49 |                       |                                                                            |     |
| 50 |                       |                                                                            |     |
| 51 | Dissemination policy: | #31c Plans, if any, for granting public access to the full protocol,       | 16  |
| 52 | reproducible research | participant-level dataset, and statistical code                            |     |
| 53 |                       |                                                                            |     |
| 54 |                       |                                                                            |     |
| 55 | Informed consent      | #32 Model consent form and other related documentation given to            | N/A |
| 56 | materials             | participants and authorised surrogates                                     |     |
| 57 |                       |                                                                            |     |
| 58 |                       |                                                                            |     |
| 59 |                       |                                                                            |     |
| 60 |                       |                                                                            |     |

1 Biological specimens #33 Plans for collection, laboratory evaluation, and storage of biological N/A  
2 specimens for genetic or molecular analysis in the current trial and  
3 for future use in ancillary studies, if applicable  
4  
5

6 The SPIRIT checklist is distributed under the terms of the Creative Commons Attribution License CC-BY-ND  
7 3.0. This checklist was completed on 08. March 2019 using <https://www.goodreports.org/>, a tool made by the  
8 [EQUATOR Network](#) in collaboration with [Penelope.ai](#)  
9  
10  
11  
12  
13  
14  
15  
16  
17  
18  
19  
20  
21  
22  
23  
24  
25  
26  
27  
28  
29  
30  
31  
32  
33  
34  
35  
36  
37  
38  
39  
40  
41  
42  
43  
44  
45  
46  
47  
48  
49  
50  
51  
52  
53  
54  
55  
56  
57  
58  
59  
60

# BMJ Open

## The DIVERT-CARE (Collaboration Action Research & Evaluation) Trial Protocol: A Multi-Provincial Pragmatic Cluster Randomized Trial of Cardio-Respiratory Management in Home Care

|                               |                                                                                                                                                                                                                                                                                                                                                                                                                                                                                                                                                                                                                                                                                                                                                                                                                                                                                                                                                                                                                                                                                                                                                                                                                                                                                                                                                                                                                                                                                                                                                                                                                                                                                                                                                                                                                                                                                                                                                                                                                                                                                                                                                                                                                                                                                                                                                                                                    |
|-------------------------------|----------------------------------------------------------------------------------------------------------------------------------------------------------------------------------------------------------------------------------------------------------------------------------------------------------------------------------------------------------------------------------------------------------------------------------------------------------------------------------------------------------------------------------------------------------------------------------------------------------------------------------------------------------------------------------------------------------------------------------------------------------------------------------------------------------------------------------------------------------------------------------------------------------------------------------------------------------------------------------------------------------------------------------------------------------------------------------------------------------------------------------------------------------------------------------------------------------------------------------------------------------------------------------------------------------------------------------------------------------------------------------------------------------------------------------------------------------------------------------------------------------------------------------------------------------------------------------------------------------------------------------------------------------------------------------------------------------------------------------------------------------------------------------------------------------------------------------------------------------------------------------------------------------------------------------------------------------------------------------------------------------------------------------------------------------------------------------------------------------------------------------------------------------------------------------------------------------------------------------------------------------------------------------------------------------------------------------------------------------------------------------------------------|
| Journal:                      | <i>BMJ Open</i>                                                                                                                                                                                                                                                                                                                                                                                                                                                                                                                                                                                                                                                                                                                                                                                                                                                                                                                                                                                                                                                                                                                                                                                                                                                                                                                                                                                                                                                                                                                                                                                                                                                                                                                                                                                                                                                                                                                                                                                                                                                                                                                                                                                                                                                                                                                                                                                    |
| Manuscript ID                 | bmjopen-2019-030301.R2                                                                                                                                                                                                                                                                                                                                                                                                                                                                                                                                                                                                                                                                                                                                                                                                                                                                                                                                                                                                                                                                                                                                                                                                                                                                                                                                                                                                                                                                                                                                                                                                                                                                                                                                                                                                                                                                                                                                                                                                                                                                                                                                                                                                                                                                                                                                                                             |
| Article Type:                 | Protocol                                                                                                                                                                                                                                                                                                                                                                                                                                                                                                                                                                                                                                                                                                                                                                                                                                                                                                                                                                                                                                                                                                                                                                                                                                                                                                                                                                                                                                                                                                                                                                                                                                                                                                                                                                                                                                                                                                                                                                                                                                                                                                                                                                                                                                                                                                                                                                                           |
| Date Submitted by the Author: | 06-Nov-2019                                                                                                                                                                                                                                                                                                                                                                                                                                                                                                                                                                                                                                                                                                                                                                                                                                                                                                                                                                                                                                                                                                                                                                                                                                                                                                                                                                                                                                                                                                                                                                                                                                                                                                                                                                                                                                                                                                                                                                                                                                                                                                                                                                                                                                                                                                                                                                                        |
| Complete List of Authors:     | <p>Costa, Andrew P ; McMaster University Faculty of Health Sciences, Department of Health Research Methods, Evidence, and Impact; McMaster University, Department of Medicine</p> <p>Schumacher, Connie; McMaster University Faculty of Health Sciences, Department of Health Research Methods, Evidence, and Impact; Hamilton Haldimand Niagara Brant Local Health Integration Network</p> <p>Jones, Aaron; McMaster University Faculty of Health Sciences, Department of Health Research Methods, Evidence, and Impact</p> <p>Dash, Darly; McMaster University Faculty of Health Sciences, Department of Health Research Methods, Evidence, and Impact</p> <p>Campbell, Graham; McMaster University Faculty of Health Sciences, Department of Health Research Methods, Evidence, and Impact</p> <p>Junek, Mats; McMaster University Faculty of Health Sciences, Department of Health Research Methods, Evidence, and Impact; McMaster University, Department of Medicine</p> <p>Agarwal, Gina; McMaster University, Department of Family Medicine; McMaster University Faculty of Health Sciences, Department of Health Research Methods, Evidence, and Impact</p> <p>Bell, Chaim; Mount Sinai Hospital, Department of Medicine</p> <p>Boscart, Veronique; Conestoga College Institute of Technology and Advanced Learning, Schlegel Centre for Advancing Seniors Care; Canadian Institutes of Health Research, Schlegel Industrial Research Chair in Seniors Care</p> <p>Bronskill, Susan; University of Toronto, Institute for Clinical Evaluative Sciences</p> <p>Feeny, David; McMaster University, Department of Economics</p> <p>Hébert, Paul C; Université de Montréal, Department of Medicine</p> <p>Heckman, George; University of Waterloo, School of Public Health and Health Systems; Research Institute for Aging, Schlegel Research Chair in Geriatric Medicine</p> <p>Hirdes, John; University of Waterloo, School of Public Health and Health Systems</p> <p>Lee, Linda; McMaster University, Department of Family Medicine</p> <p>McKelvie, Robert; Western University, Department of Medicine; St. Joseph's Health Care London, Department of Medicine</p> <p>Mitchell, Lori; Winnipeg Regional Health Authority, Home Care</p> <p>Sinha, Samir; University of Toronto, Departments of Medicine, Family and Community Medicine, and Institute of Health Policy, Management</p> |

|                                    |                                                                                                                                                                                                                                                                                                                                                                                                                                                                     |
|------------------------------------|---------------------------------------------------------------------------------------------------------------------------------------------------------------------------------------------------------------------------------------------------------------------------------------------------------------------------------------------------------------------------------------------------------------------------------------------------------------------|
|                                    | and Evaluation<br>Davis, Joy; Western Health Care Corp, Information Management<br>Priddle, Tammy; Western Health Care Corp, Community Support<br>Rose, Joanne; Government of Newfoundland and Labrador, Department<br>of Health and Community Services<br>Gillan, Roslyn; Island Health, Community Health Services<br>Mills, Deborah; Island Health, Community Health Services<br>Haughton, Dilys; Hamilton Niagara Haldimand Brant Community Care<br>Access Centre |
| <b>Primary Subject<br>Heading</b>: | Health services research                                                                                                                                                                                                                                                                                                                                                                                                                                            |
| Secondary Subject Heading:         | Cardiovascular medicine, Evidence based practice, Geriatric medicine,<br>Nursing                                                                                                                                                                                                                                                                                                                                                                                    |
| Keywords:                          | Cardio-Respiratory Disease Management, Chronic Disease Management,<br>Cluster-randomized, DIVERT Scale, Home Care                                                                                                                                                                                                                                                                                                                                                   |
|                                    |                                                                                                                                                                                                                                                                                                                                                                                                                                                                     |

SCHOLARONE™  
Manuscripts

Version: 6.5(AC)

Date: November, 2019

**The DIVERT-CARE (Collaboration Action Research & Evaluation) Trial Protocol: A Multi-Provincial Pragmatic Cluster Randomized Trial of Cardio-Respiratory Management in Home Care**

Andrew P. Costa, Connie Schumacher, Aaron Jones, Darly Dash, Graham Campbell, Mats Junek, Gina Agarwal, Chaim Bell, Veronique Boscart, Susan Bronskill, David H. Feeny, Paul Hébert, George Heckman, John P. Hirdes, Linda Lee, Robert McKelvie, Lori Mitchell, Samir Sinha, Joy Davis, Tammy Priddle, Joanne Rose, Roslyn Gillan, Deborah Mills, Dilys Haughton

Andrew P. Costa, Department of Health Research Methods, Evidence, and Impact, McMaster University, Hamilton, Canada; Department of Medicine, McMaster University, Hamilton, Canada; Schlegel Chair in Clinical Epidemiology & Aging

Connie Schumacher, Department of Health Research Methods, Evidence, and Impact, McMaster University, Hamilton, Canada; Hamilton Niagara Haldimand Brant Local Health Integration Network, Hamilton, Ontario, Canada

Aaron Jones, Department of Health Research Methods, Evidence, and Impact, McMaster University, Hamilton, Canada

Darly Dash, Department of Health Research Methods, Evidence, and Impact, McMaster University, Hamilton, Canada

Graham Campbell, Department of Health Research Methods, Evidence, and Impact, McMaster University, Hamilton, Canada

Mats Junek, Department of Health Research Methods, Evidence, and Impact; Department of Medicine, McMaster University, Hamilton, Canada

Gina Agarwal, Department of Family Medicine, McMaster University, Hamilton, Canada; Department of Health Research Methods, Evidence, and Impact, McMaster University, Hamilton, Canada

Chaim M. Bell, Department of Medicine, Mount Sinai Hospital, Toronto, Canada

Veronique Boscart, Schlegel Centre for Advancing Seniors Care, Conestoga College Institute of Technology & Advanced Learning, Kitchener, Canada; CIHR/Schlegel Industrial Research Chair in Seniors Care

Susan E. Bronskill, Institute for Clinical Evaluative Sciences, Toronto, Canada

David H. Feeny, Department of Economics, McMaster University, Hamilton, Canada

Paul Hébert, Department of Medicine, Université de Montréal, Montréal, Canada

George A. Heckman, School of Public Health and Health Systems, University of Waterloo, Waterloo, Canada; Schlegel Research Chair in Geriatric Medicine

1  
2  
3 John P. Hirdes, School of Public Health and Health Systems, University of Waterloo, Waterloo,  
4 Canada

5  
6 Linda Lee, Department of Family Medicine, McMaster University, Hamilton, Canada

7  
8 Robert S. McKelvie, Professor, Department of Medicine (Cardiology), Western University and St.  
9 Joseph's Health Care, London, Canada

10  
11 Lori Mitchell, Home Care, Winnipeg Regional Health Authority, Winnipeg, Canada

12  
13 Samir K. Sinha, Departments of Medicine, Family and Community Medicine and Institute of  
14 Health Policy, Management and Evaluation, University of Toronto, Toronto, Canada

15  
16 Joy Davis, Information Management, Western Health, Corner Brook, Canada

17  
18 Tammy Priddle, Community Support, Western Health, Corner Brook, Canada

19  
20 Joanne Rose, Department of Health and Community Services, Government of Newfoundland  
21 and Labrador, St. John's, Canada

22  
23 Roslyn Gillan, Community Health Services, Island Health, Victoria, Canada

24  
25 Deborah Mills, Community Health Services, Island Health, Victoria, Canada

26  
27 Dilys Haughton, Niagara Haldimand Brant Community Care Access Centre, Hamilton, Ontario,  
28 Canada

29  
30 **Corresponding Author**

31 Andrew P Costa, Ph.D.

32 Schlegel Chair in Clinical Epidemiology & Aging

33 Dept. of Health Research Methods, Evidence, and Impact & Dept. of Medicine

34 McMaster University

35 CRL-219, 1280 Main St. W., Hamilton, ON, L8S 4K1

36 905 525 9140 x22067

37 acosta@mcmaster.ca

38  
39  
40 **(300 words abstract, 4000 words total)**

41  
42  
43 Abstract Word Count: 254

44  
45 Manuscript Word Count: 3,774

## ABSTRACT

### Introduction:

Home care clients are increasingly medically complex, have limited access to effective chronic disease management, and have very high emergency department (ED) visitation rates. There is a need for more appropriate and targeted supportive chronic disease management for home care clients. We aim to evaluate the effectiveness and preliminary cost-effectiveness of a targeted, person-centered cardio-respiratory management model.

### Methods and analysis:

The DIVERT (Detection of Indicators and Vulnerabilities of Emergency Room Trips) – Care trial is a pragmatic, cluster-randomized, multi-center superiority trial of a flexible multi-component cardio-respiratory management model based on best-practice guidelines. The trial will be conducted in partnership with three regional, public-sector, home care providers across Canada. The primary outcome of the trial is the difference in time to first unplanned ED visit (hazard rate) within six months. Additional secondary outcomes are to identify changes in patient activation, changes in cardio-respiratory symptom frequencies, and cost-effectiveness over six months. We will also investigate the difference in the number of unplanned ED visits, number of inpatient hospitalizations, and changes in health-related quality of life. Multi-level proportional hazard and generalized linear models will be used to test the primary and secondary hypotheses. Sample size simulations indicate that enrolling 1,100 home care clients across 36 clusters (home care caseloads) will yield a power of 81% given a hazard ratio of 0.75.

### Ethics and dissemination:

Ethics approval was obtained from the Hamilton Integrated Research Ethics Board as well as each participating site's ethics board. Results will be submitted for publication in peer-reviewed journals and for presentation at relevant conferences. Home care service partners will also be informed of the study's results. The results will be used to inform future support strategies for older adults receiving home care services.

**Trial registration number:** ClinicalTrials.gov: NCT03012256

**Keywords:** Cardio-Respiratory Disease Management, Chronic Disease Management, Cluster-randomized, DIVERT Scale, Home Care



### Strengths and limitations of this study

- The pragmatic attitude of the trial towards cluster selection, cluster assignment, participant selection, participant recruitment, informed consent, and outcome measurement supports generalization to other jurisdictions.
- Post randomization selection bias is limited by the use of existing, objective measures of eligibility.
- The use of secondary data for baseline data collection and follow-up measurement increases the accuracy of the data collection and limits the loss to follow-up compared to primary collection methods.
- It is not possible to conceal the treatment assignment, which exposes half of the primary and secondary outcomes measures to placebo and observer-expectancy effects.
- The jurisdictions included in the study used a convenience, non-probability sampling approach in cluster selection, which may limit external validity.

## INTRODUCTION:

Publicly-funded home care services are delivered to at least 6% of Canadians age 65-74, 15% age 75-84 and 32% age 85 or older. [1] These home care clients are increasingly medically complex, often access care across multiple settings, have very high emergency department (ED) visitation rates, and have relatively poor access to effective chronic disease management.[2–4] Their frequent ED use is not congruent with chronic disease management or geriatric care principles and creates excess cost burdens on the health care system.[5,6]

Effective chronic disease management models employ multiple components delivered by a coordinated multidisciplinary team.[7] According to the ‘chronic disease management model’, home care plays a complementary function to the care medical practitioners provide.[7] Clinical and self-care support, as well as case management are among the most effective components in chronic disease management.[8–10] Self-care education and support has been shown to improve health outcomes across chronic diseases.[11,12] The provision of sustained follow-up by nurses or non-medical staff can also be effective.[13,14]

Effective home care services have been limited by insufficient targeting of clients that are most at need or most likely to benefit.[15,16] We developed and validated a prognostic case-finding tool for home care clients known as the Detection of Indicators and Vulnerabilities of Emergency Room Trips (DIVERT) Scale that has been recommended for use in the provision of home care.[17–19] It can be derived in real time from the interRAI Home Care (RAI-HC) standardized home care assessment system used in 9 Canadian provinces as well as Estonia, Finland, Hong Kong, Iceland, Ireland, Italy, Japan, the Netherlands, New Zealand, Singapore, Spain, Switzerland, and 29 U.S. states. Cardio-respiratory symptoms and conditions are prominent predictive elements of the DIVERT Scale.

Canadian home care providers, historically focused on the delivery of personal support services, have started to develop supportive chronic disease management capacity (e.g., specialist nurse monitoring).[20] Most trials, however, exclude frail seniors and are not specific to home care, which leaves little evidence to inform chronic disease management practices in this large sector of health care.[17]

From evidence-based guidelines developed – in part – by our team, extensive client profiling, and input of clients/families as well as health professionals, we developed a person-centred, multi-component cardio-respiratory management model. Our approach is based on evidence of effective implementations in other fields,[21] and includes all elements for ‘person-centred care’.[22] The pilot study was recognized on the 2015 Ontario Minister of Health and Long-Term Care’s Medal Honour Roll for Excellence in Health Quality.[23,24]

Recent Canadian trials have tested a ‘Virtual Ward’ and a ‘transitional care services’ model in post-acute adult patients (the latter with heart failure) and found no benefit.[25,26] The ‘Virtual Ward Model’ cited difficulty of hospital teams to integrate with community-based care. Community-based chronic disease management can reduce hospital use.[25,27] Our study diverges from this given that we focus on home care clients who are frail and not specifically

1  
2  
3 'post-acute'. Also, our intervention leverages a validated case finding tool based on real-time  
4 inputs from community-based providers rather than care from hospital-based teams.  
5  
6

7 The DIVERT-CARE trial will adopt a pragmatic attitude to avoid the well-documented difficulty  
8 that many clinical trials have in producing results that are generalizable to real-world  
9 conditions.[28,29] As our interest is in the effects of the intervention under realistic rather than  
10 optimal conditions, the intervention will be delivered in usual care settings by usual care  
11 providers for usual clients. Home care caseloads will be randomized to intervention or control  
12 rather than individual clients in order to mimic the process that would occur when clinical  
13 practice changes. Cluster randomized designs are commonly utilized in pragmatic trials as  
14 practice changes are implemented at levels higher than the client in real-world  
15 conditions.[30,31] The DIVERT-CARE trial will also make use of secondary data sources for  
16 outcome measurement. The use of administrative data has been shown to be more accurate  
17 than client-reported results for health services utilization and permits excellent follow-up over  
18 long periods of time without the need for intrusive follow-up procedures.[32,33] A number of  
19 pragmatic, cluster-randomized trials using administrative data have appeared in the  
20 literature.[34–37]  
21  
22  
23  
24

25 This paper describes the protocol and presents the rationale for a cluster-randomized study  
26 investigating the effectiveness of a cardio-respiratory disease management model in a targeted  
27 home care client population. This paper complies with the SPIRIT 2013 recommendations for  
28 clinical trial protocol reporting.[38] This trial will report findings in accordance with CONSORT  
29 guidelines.[39]  
30  
31  
32

## 33 **METHODS AND ANALYSIS:**

### 34 **Study Population**

35 The trial will be conducted in partnership with three regional, public-sector, home care  
36 providers across Canada: Hamilton-Niagara-Haldimand-Brant Local Health Integration Network  
37 (HNHB LHIN) in Ontario, Western Health in Newfoundland, and Island Health in British  
38 Columbia. These three Canadian jurisdictions were selected from 5 potential jurisdictions that  
39 expressed interest based on their geographical (West, Central, and East) and political-cultural  
40 diversity. Each health care provider will select a number of home care caseloads to be included  
41 in the study based on historical practice patterns from each sub-region including caseload size,  
42 home care enrollment, and assessment patterns. A caseload represents a group of clients in a  
43 small geographical area that is served by a home care coordinator (or 'case manager').  
44 Recruitment and randomization will occur at the level of the caseload and as such, clients were  
45 not involved in the research strategy. Each site will select enough caseloads to enroll  
46 approximately 360 long-stay home care clients, for a total of 1,100 clients over a 1.5-year time  
47 frame. We expect that over 42 distinct geographic home care caseloads will be enrolled in total.  
48  
49  
50  
51

### 52 **Study Design**

53 The DIVERT-CARE trial is a pragmatic, cluster-randomized, two-arm parallel cluster, multi-  
54 center, superiority trial with a primary outcome of time to first ED visit within 6 months of the  
55 index home care clinical assessment. The unit of randomization/intervention will be the cluster  
56  
57  
58  
59  
60

(home care caseload; Figure 1: Caseload randomization schematic), while the unit of inference/measurement/analyses will be the home care client. The cluster-randomized design limits the potential for contamination and differential enrollment given that management and discretion over the use of resources is contained within each home care caseload. This design also supports the feasibility of the trial by reducing the number of resources (care providers) required to be trained in the intervention protocol. See Table 1 for an overview of the trial methods and design; Protocol Version 2.1 (2017-04-17).

**Figure 1: Caseload Randomization Schematic**

<see Figure 1 attachment.>

**Table 1:** World Health Organization Trial Registration Data Set for DIVERT-CARE Trial (as of 11.03.2019; Protocol Version 2.1, 2017-04-17)

| Data Category                                 | Information                                                                                                                                                                                                                                                                    |
|-----------------------------------------------|--------------------------------------------------------------------------------------------------------------------------------------------------------------------------------------------------------------------------------------------------------------------------------|
| Primary registry and trial identifying number | ClinicalTrials.gov<br>NCT03012256                                                                                                                                                                                                                                              |
| Date of registration in primary registry      | 6 January, 2017                                                                                                                                                                                                                                                                |
| Secondary identifying numbers                 |                                                                                                                                                                                                                                                                                |
| Source(s) of monetary or material support     | Canadian Institutes of Health Research (CIHR); Hamilton Niagara Haldimand Brant Community Local Health Integration Network (Hamilton, Ontario); Western Health (Corner Brook, Newfoundland and Labrador); Island Health (Victoria, British Columbia); Canadian Frailty Network |
| Primary sponsor                               | McMaster University                                                                                                                                                                                                                                                            |
| Secondary sponsor(s)                          | N/A                                                                                                                                                                                                                                                                            |
| Contact for public queries                    | Graham Campbell, MA [campbg4@mcmaster.ca]                                                                                                                                                                                                                                      |
| Contact for scientific queries                | Andrew Costa, PhD [acosta@mcmaster.ca]<br>McMaster University                                                                                                                                                                                                                  |
| Public title                                  | The DIVERT-CARE (Collaboration Action Research & Evaluation) Trial                                                                                                                                                                                                             |
| Scientific title                              | The DIVERT-CARE (Collaboration Action Research & Evaluation) Trial: A Multi Provincial Pragmatic Cluster Randomized Trial of Cardio-Respiratory Management in Home Care                                                                                                        |
| Countries of recruitment                      | Canada                                                                                                                                                                                                                                                                         |
| Health condition(s) or problem(s) studied     | Heart Failure; COPD                                                                                                                                                                                                                                                            |
| Intervention(s)                               | <b>Experimental:</b> Cardio-respiratory management model[40]<br><b>Control:</b> usual care / no intervention                                                                                                                                                                   |
| Key inclusion and exclusion criteria          | <b>Inclusion Criteria:</b>                                                                                                                                                                                                                                                     |

|    |                         |                                                                  |
|----|-------------------------|------------------------------------------------------------------|
| 1  |                         |                                                                  |
| 2  |                         |                                                                  |
| 3  |                         | Long-stay home care clients living in a non-institutional        |
| 4  |                         | setting (i.e. admitted to home care and receive                  |
| 5  |                         | comprehensive clinical assessment (RAI-HC))                      |
| 6  |                         | Clients with DIVERT score of 9, 10, 14, or 15 (i.e. at least one |
| 7  |                         | cardio-respiratory symptom [chest pain, dyspnea, dizziness,      |
| 8  |                         | irregular pulse]and at least one cardiac condition               |
| 9  |                         | [congestive heart failure or coronary artery disease])           |
| 10 |                         | <b>Exclusion Criteria:</b>                                       |
| 11 |                         | Clients receiving palliative care (i.e. Prognosis of less than   |
| 12 |                         | six months to live at time of assessment [Q. K8e from RAI-       |
| 13 |                         | HC])                                                             |
| 14 |                         | Clients receiving dialysis (Q. P2g from RAI-HC)                  |
| 15 |                         |                                                                  |
| 16 |                         |                                                                  |
| 17 |                         |                                                                  |
| 18 | Study type              | Interventional                                                   |
| 19 |                         | Allocation: cluster randomized intervention model. Parallel      |
| 20 |                         | assignment, open label                                           |
| 21 |                         | Primary purpose: prevention                                      |
| 22 |                         | Pragmatic                                                        |
| 23 |                         |                                                                  |
| 24 | Date of first enrolment | 6 February, 2018                                                 |
| 25 | Target sample size      | 1080                                                             |
| 26 | Recruitment status      | Recruiting                                                       |
| 27 | Primary outcome(s)      | The difference in days to first unplanned emergency              |
| 28 |                         | department visit (hazard rate) [Time Frame: Up to six            |
| 29 |                         | months from baseline]; The difference in total care costs        |
| 30 |                         | controlling for length of stay [Time Frame: Up to six months     |
| 31 |                         | from baseline]; Changes in patient activation (patient           |
| 32 |                         | activation questionnaire) [Time Frame: Baseline, 2 months,       |
| 33 |                         | 4 months, 6 months]; The difference in the number of             |
| 34 |                         | symptoms [Time Frame: Baseline, 2 months, 4 months, 6            |
| 35 |                         | months]                                                          |
| 36 |                         |                                                                  |
| 37 |                         |                                                                  |
| 38 | Key secondary outcomes  | The difference in the number of unplanned emergency              |
| 39 |                         | department visits [Time Frame: Up to six months from             |
| 40 |                         | baseline]; Description of health-related quality of life         |
| 41 |                         | (quality of life questionnaire) [Time Frame: 4 months, 6         |
| 42 |                         | months]                                                          |
| 43 |                         |                                                                  |
| 44 |                         |                                                                  |

### Study Objectives

Our main objective is to evaluate the effectiveness and preliminary cost-effectiveness of a targeted, person-centered cardio-respiratory management model. The sample size for the primary outcome was calculated to determine whether the cardio-respiratory disease management model is superior to standard of care in postponing unplanned ED visits. Additional outcomes include determining if the cardio-respiratory disease management model is superior to standard of care in improving client activation, reducing symptoms, and the cost-effectiveness of this model. The symptoms of interest are shortness of breath, chest pain at rest

1  
2  
3 or on exertion, dizziness, perceived pain control, edema, noticeable decrease in food/fluids  
4 consumed, and unintended weight loss.  
5

6  
7 Secondary objectives include determining if the cardio-respiratory disease management model  
8 is superior to standard of care for the number of unplanned ED visits, number of unplanned  
9 hospital admissions, and change in health-related quality of life (HRQOL). HRQOL will be  
10 assessed by the Minimal Data Set Health Status Index (MDS-HSI), which is a RAI-HC derived  
11 measure based on the Health Utilities Index Mark 2 that has demonstrated longitudinal  
12 construct validity.[41,42]  
13  
14

### 15 **Eligibility Criteria**

16 The pragmatic attitude of the trial warrants the broadest inclusion criteria that are feasible. To  
17 be eligible for inclusion into this trial, home care clients must possess the following  
18 characteristics:  
19

- 20 • Admitted to home care and receive comprehensive clinical assessment (RAI-HC) as part  
21 of regular home care enrolment, or reassessment;
- 22 • 19 years or older at time of assessment; and
- 23 • Categorized into DIVERT subgroups 9,10,14, or 15 (Figure 2: DIVERT Scale Target  
24 Groups). This includes:  
25 ○ those with cardio-respiratory symptoms (chest pain, dyspnea, dizziness, irregular  
26 pulse) who have a diagnosis of chronic cardiac disease and have not used an ED  
27 or hospital in the last 90 days (9, 10); OR  
28 ○ those with cardio-respiratory symptoms who have had one ED or hospital  
29 exposure in the last 90 days, regardless of if they are diagnosed with chronic  
30 cardiac disease (14, 15).  
31  
32  
33  
34

### 35 **Figure 2: DIVERT Scale Target Groups**

<see Figure 2 attachment.>

36  
37 We will exclude clients with a prognosis of less than six months to live at time of assessment (Q.  
38 K8e from RAI-HC) and clients requiring dialysis treatment (Q. P2g from RAI-HC). The exclusion of  
39 palliative and dialysis care clients is necessary as some jurisdictions place these clients on  
40 specialized caseloads.  
41  
42

43  
44 The eligibility criteria for the trial will result in a population that is representative of non-  
45 palliative home care clients in Canada who have cardio-respiratory symptoms and conditions. It  
46 captures approximately 1/3 of all assessed home care clients. However, we excluded individuals  
47 with cardio-respiratory symptoms with 2 or more hospital or ED episodes in the past 90 days  
48 given that they were determined in a pilot study to have exceedingly complex psycho-social  
49 needs (such as housing) that we could not address. They account for less than 4% of home care  
50 clients.  
51  
52

### 53 **Recruitment and Consent**

54 All non-palliative, non-dialysis, adult home care clients in the trial caseloads assessed using the  
55 RAI-HC (during regular home care enrollment or reassessment) who fall into one of the four  
56  
57  
58

1  
2  
3 target DIVERT subgroups will be enrolled into the study by a care coordinator at the time of  
4 assessment. Eligible clients will automatically be included into the intervention or 'regular care'  
5 control groups on an intent-to-treat basis. Recruitment is expected to proceed over 6-9 months  
6 for each site. Analysis of the sample size simulations that were carried out on retrospective  
7 data from the HNH B LHIN region from November 2014 to June 2015 indicates an expected  
8 enrollment of 4 clients per caseload per month.  
9  
10

11 Each home care partners' process for attaining consent will apply to the trial. Individual  
12 informed consent will not be sought given that the cardio-respiratory management model is  
13 accepted, considered best practice care, and is offered – whole or in part – at the full clinical  
14 discretion of the home care provider as per existing practice. Trial investigators have no part in  
15 the data collection, individual care decision-making, or record management during the study  
16 period beyond providing overall scientific guidance. We requested and received alteration to  
17 the requirements for consent based on satisfying the following Canadian Tri-Council Policy  
18 Statement: Ethical Conduct for Research Involving Humans (TCPS 2) criteria:[43]  
19  
20  
21

- 22 1. The research involves no more than minimal risk to the participants.
- 23 2. The alteration to consent requirements is unlikely to adversely affect the welfare of  
24 participants.
- 25 3. It is impossible or impracticable to carry out the research and to address the research  
26 questions properly, given the research design, if the prior consent of participants is  
27 required.
- 28 4. In the case of a proposed alteration, the precise nature and extent of any proposed  
29 alteration is defined.
- 30 5. The plan to provide a debriefing (if any) which may offer participants the possibility of  
31 refusing consent and/or withdrawing data and/or human biological materials, shall be in  
32 accordance with Article 3.7B.  
33  
34  
35  
36

37 Our waiver of informed consent complies with existing methodological and ethical guidelines  
38 for pragmatic cluster-randomized trials. Existing guidelines state that informed consent by  
39 clients is not needed if "the intervention is to the clear advantage of every person in the cluster  
40 for the cluster to be entered in the trial"[44].  
41  
42  
43

### 44 **Intervention**

45 Care planning and self-care support have been shown to be among the most effective elements  
46 of cardio-respiratory disease management[8,10] along with sustained follow-up by nurses or  
47 non-medical staff [13,14]. Care planning will be completed in a collaborative fashion amongst a  
48 care coordinator, the client, and the client's caregivers (both formal and informal). Clients in the  
49 intervention group will have their care plans guided by a multi-component cardio-respiratory  
50 disease management model in addition to receiving their usual care.[39] This comprehensive  
51 model for the intervention has been described in greater detail in a previous publication.[40]  
52 The person-centered, multi-component cardio-respiratory management model was developed  
53 based on guidelines,[17,45,46] extensive home care client profiling, and input from  
54 clients/families and health professionals. The management model contains the following  
55  
56  
57  
58  
59  
60

components (see Table 2: Description of Intervention Components): scheduled nurse-led self-management support (based on a training program and tool-kit); access to a staffed helpline; education on vaccines; advance care and goal planning; clinical pharmacist medication reconciliation; team case rounds; situation, background, assessment, and recommendation (SBAR) communication protocol with primary care; and a standardized transition package.[21,40,47] Each component has a specific objective within the model, however the manner in which it is delivered may be adapted. For example, some home care providers have clinical pharmacists on staff whereas others would rely on collaboration with community pharmacists.

**Table 2: Description of intervention components**

| <b>DIVERT-CARE Intervention Components</b>                       | <b>Description</b>                                                                                                                               |
|------------------------------------------------------------------|--------------------------------------------------------------------------------------------------------------------------------------------------|
| <b>Case Finding Using the DIVERT Scale</b>                       | Use of the DIVERT Scale (embedded in interRAI assessment) to identify home care clients most likely to benefit.                                  |
| <b>Self-Management Education and Supports</b>                    | In-home assessment of self-management goals and needs, with practical education and skills training to recognize and manage symptoms.            |
| <b>Access to an immediate nurse-staffed helpline</b>             | Direct phone line staffed by nurses involved in the DIVERT-CARE Intervention to aid with self-management and problem resolution.                 |
| <b>Promotion of Vaccines</b>                                     | Seasonal flu vaccine and pneumococcal polysaccharide (Pneu-P-23) information and health promotion consistent with Canadian practice guidelines.  |
| <b>Advance Care and Goal Planning</b>                            | Consultation for advance care and goals of care planning, advanced care decisions, and communication of care wishes.                             |
| <b>Clinical Pharmacist-Led Medication Review</b>                 | Review of medication for safety, efficacy and appropriate use of medications and delivery options.                                               |
| <b>Interprofessional Team Case Rounds</b>                        | Weekly or biweekly care team meeting to discuss care plan, update goals, and how to support changing care needs.                                 |
| <b>SBAR Communication with Primary Care Providers</b>            | SBAR formatted communication to effectively communicate disease relevant information and care updates to primary and specialist care providers.  |
| <b>Standardized ED Transition Package / Personal Care Record</b> | A succinct document to support continuity of care throughout health system. Personal care record of goals, plan of care, and community supports. |



1  
2  
3 Self-management education and supports will be tailored to the needs and goals of the client.  
4 As with all home care services, clients may refuse all or any of the intervention components.  
5 The components will be delivered over 15 weeks by care coordinators and nurses who have  
6 been trained by the research team. Care coordinators and nurses will be provided detailed  
7 manuals explaining the components and their role in supporting clients throughout the  
8 intervention. The self-management program, based on previous pilot work[24], will use a  
9 population-based care approach pioneered by Wagner (1995) to help trial partners implement  
10 the cardio-respiratory disease management model.[48]  
11  
12  
13

14 The intervention adheres to the following three principles: 1) multidisciplinary teams at each  
15 site will be trained on the protocols and resources related to each component of cardio-  
16 respiratory management model; 2) the teams will identify steps required to deliver the  
17 interventions; 3) the teams will plan the deployment of the cardio-respiratory management  
18 model that engages clients, families, and caregivers to ensure that adequate resources are  
19 dedicated to support the interventions across the intervention caseloads, while ensuring long-  
20 term sustainability.  
21  
22  
23

24 Clients in the control group will receive the usual set of home care services. No changes will be  
25 made to their care planning process. Depending on the jurisdiction and client needs, usual care  
26 may include personal support, nursing, physiotherapy, occupational therapy, and other  
27 services. Depending on the jurisdiction, access to the components described in the cardio-  
28 respiratory disease management model is either non-existent or otherwise very rare and  
29 inconsistent for clients receiving usual care.  
30  
31  
32

### 33 **Allocation**

34 Caseload randomization was designed and completed centrally and not revealed to prospective  
35 sites until after all site caseloads were enrolled. Caseloads were randomized to intervention or  
36 control, and stratified by home care provider (region) and sub-region (areas with similar  
37 economic status, access to care, and geography) at a 1:2 intervention to control ratio. The  
38 uneven allocation ratio increases the power of the trial while only minimally impacting  
39 operational and research resources.  
40  
41  
42

43 A blocked allocation sequence was created via random number generation in collaboration with  
44 the biostatistics unit at St. Joseph's Healthcare Hamilton. The sequence features a 1:2 allocation  
45 ratio with a block of size three. After enrollment, caseloads from each region were sorted by  
46 sub-region and allocated using the sequence. In the event that the end of the clusters in a sub-  
47 region did not coincide with the end of a block, the rest of the block was skipped and allocation  
48 of the next sub-region started with a new block.  
49  
50

### 51 **Data Collection and Outcome Measures**

52 The primary outcomes will be collected using secondary data over the six-month observation  
53 period (see Table 3: Routine Measurement). The use of routinely collected data for primary  
54 outcomes, cost, and health measures limits potential for bias from lack of blinding given that  
55 neither the care team nor the trial investigators are directly involved in the collection of  
56  
57  
58  
59

outcomes. These records are accurate given that they are the basis for health care reporting systems and payments between public home care providers and contracted service providers.

**Table 3: Routine Measurement**

| Activity                                                          | Staff Member     | Approximate Time to Complete | Baseline | 2 Months | 4 Months | 6 Months |
|-------------------------------------------------------------------|------------------|------------------------------|----------|----------|----------|----------|
| Assess for eligibility (If intervention caseload) (RAI-HC)        | Care coordinator | 5 minutes                    | X        |          |          |          |
| Symptoms (RAI-HC)                                                 | Care coordinator | 15 minutes                   | X        | X        | X        | X        |
| Health-related quality of life (RAI-HC)                           | Care coordinator | 30 minutes                   | X        |          | X        | X        |
| Patient Activation Measure (PAM-13)                               | Care coordinator | 5 minutes                    | X        | X        | X        | X        |
| Administrative service and billing records (CHRIS, HCC MRR, CRMS) | N/A              | N/A                          | X        | X        | X        | X        |
| Emergency department and hospital records (NACRS, DAD)            | N/A              | N/A                          | X        | X        | X        | X        |

**Legend:**

RAI-HC: Resident Assessment Instrument for Home Care (<https://www.cihi.ca/en/home-care>)

PAM-13: Patient Activation Measure (<https://www.insigniahealth.com/products/pam-survey>)

CHRIS: Client Health and Related Information System (<https://hssontario.ca/Who/Pages/protecting-your-privacy.aspx>)

HCC MRR: Home and Community Care Minimum Reporting Requirements (<https://www2.gov.bc.ca/assets/gov/health/forms/5502datadictionary.pdf>)

CRMS: Client and Referral Management System

([https://www.nlchi.nl.ca/images/ProvincialCRMS\\_Registration\\_User\\_Guide\\_v2\\_0\\_2017-09-01.pdf](https://www.nlchi.nl.ca/images/ProvincialCRMS_Registration_User_Guide_v2_0_2017-09-01.pdf))

NACRS: National Ambulatory Care Reporting System (<https://www.cihi.ca/en/national-ambulatory-care-reporting-system-metadata>)

DAD: Discharge Abstract Database (<https://www.cihi.ca/en/discharge-abstract-database-metadata>)

The main secondary data sets include the Resident Assessment Instrument for Home Care (RAI-HC), the Patient Activation Measure (PAM-13), the Client Health and Related Information System (CHRIS), the Home and Community Care Minimum Reporting Requirements (HCC MRR), the Client and Referral Management System (CRMS), the National Ambulatory Care Reporting System (NACRS), and the Discharge Abstract Database (DAD).

The RAI-HC is a standardized comprehensive assessment containing approximately 200 items and has been found to document major domains of health reliably.[49–53]

1  
2  
3  
4 The Patient Activation Measure (PAM-13) [54] indicates the client's progress through four  
5 stages as they become activated (i.e., they believe their role in their own care is important, they  
6 learn enough to develop confidence to act on their own belief, they actually act, and they reach  
7 the point where they can act even under stress). The PAM is a widely used measure of patient  
8 activation that has demonstrated sensitivity to health-related outcomes, including health  
9 service use.[55,56]  
10  
11

12  
13 The CHRIS is the health administrative database used by Ontario's publicly-funded home care  
14 providers. It includes client assessments, documents, provider and vendor contracts, billing of  
15 services information, and medical supplies and equipment rental costs.  
16  
17

18 The HCC MRR is an information management system defining a set of data elements that are  
19 reported to the British Columbia Ministry of Health by the regional health authorities. The HCC  
20 MRR captures information on clients, income, and home and community care services.  
21  
22

23 The Client and Referral Management System (CRMS) is a health information system designed to  
24 support client and referral management for clients receiving community-based services from  
25 the regional health boards in Newfoundland. It contains information on client records and  
26 clinical activity.  
27  
28

29 The NACRS contains data from all national hospital-based and community-based ambulatory  
30 care. It is collected and maintained by the Canadian Institute for Health Information (CIHI),  
31 which conducts its own quality assurance procedures to ensure accuracy and completeness.  
32  
33

34 The DAD captures administrative, clinical, and demographic information nationally on hospital  
35 discharges (including deaths, sign-outs, and transfers). It is collected and maintained by CIHI,  
36 which conducts its own quality assurance procedures to ensure accuracy and completeness.  
37  
38

### 39 **Sample Size Calculations**

40  
41 Sample size calculation assumptions:

- 42 • Primary outcome: Time to first unplanned ED visit within 6 months of baseline
- 43 • Hazard ratio of 0.75
- 44 • Mean size of a home care caseload: 120 clients
- 45 • Mean prevalence of DIVERT target group in each caseload: 30%
- 46 • Expected recruitment over 6 months per caseload: 30
- 47 • Mean cluster size: 30
- 48 • Allocation: 1:2 (intervention: control)
- 49
- 50
- 51

52 Simulations using retrospective secondary data sources were undertaken to explore the power  
53 of a hypothetical DIVERT-CARE trial conducted in the HNHB LHIN region of Ontario from  
54 December 2015 to June 2016. The simulations found that 36 HNHB home care caseloads  
55  
56  
57  
58  
59

1  
2  
3 randomized at a 1:2 intervention to control ratio could expect to enroll 1,100 clients across  
4 seven months. The simulation linked clients to their actual ED utilization records and extended  
5 the time to first ED visit figures for clients in 12 randomly selected intervention caseloads to  
6 achieve a hazard ratio of 0.75, a figure chosen to be more conservative than the pilot study but  
7 still clinically significant. The overall event rate was 35.5% in the intervention group and 44.8%  
8 in the control. The median time to first visit was 88 days in the intervention group and 75 days  
9 in the control. The power of the simulated DIVERT trial was 81.3% with a two-sided alpha of  
10 0.05. Simulations with a hazard ratio of 0.80 yielded a power of 60.1%. The intraclass  
11 correlation coefficient (ICC) was estimated to be 0.005.  
12  
13  
14

15 Based on the simulations the target sample size for the trial will be 1,100 clients, which will  
16 yield an approximate power of 81% for a hazard ratio of 0.75 and 60% for a hazard ratio of 0.80.  
17  
18

### 19 **Statistical Analyses**

20 Descriptive analyses will compare the treatment groups and sites on baseline demographic and  
21 clinical characteristics. Statistics on compliance, censoring, and follow-up times will also be  
22 presented.  
23  
24

25 The primary outcome will be assessed through a multi-level proportional hazards model on an  
26 intent-to-treat basis. The dependent variable will be days until first unplanned ED visit,  
27 censored at date of home care discharge for any reason. Caseload and partner site will be  
28 included as nested random effects. Both unadjusted and adjusted results will be reported. For  
29 adjusted analysis, DIVERT subgroup, age, and sex will be included as time-independent fixed  
30 effects. The hazard ratio, 95% confidence interval, and p-value will be reported for the  
31 treatment group effect and covariates when applicable. A two-sided alpha level of 0.05 will be  
32 used to judge statistical significance.  
33  
34  
35

36 The assumption of proportionality of hazards across treatment groups will be evaluated by a  
37 visual inspection of the hazard curves and statistical testing of a time-dependent treatment  
38 group effect. If the hazard curves cross or the time-dependent treatment group effect is  
39 significant ( $p < 0.05$ ) then primary analysis will be modified to consider treatment group as a  
40 time-varying effect.  
41  
42  
43

44 The economic evaluation will examine total care costs, controlling for length of stay, between  
45 treatment groups to compare incremental costs to incremental effects (i.e., cost per ED visit  
46 averted). Total care costs are defined as direct costs incurred by the home care provider in the  
47 provision of home care services, including: human resources and equipment. We will use a  
48 micro-costing approach based on the listed/billed service cost consumed by each patient.  
49  
50

51 The other outcomes will be evaluated by multi-level generalized linear models. Four-month and  
52 six-month changes in PAM, HRQOL, number of symptoms, number of ED visits, and number of  
53 unplanned hospitalizations will be the respective dependent variables. Caseload and partner  
54 site will be included as nested random effects. Both unadjusted and adjusted results will be  
55 reported. For adjusted analysis DIVERT subgroup, age, and sex will be included as fixed effects.  
56  
57  
58  
59

1  
2  
3 Unit change and rate ratios, with their associated 95% confidence interval and p-values, will be  
4 reported for the treatment group effect and covariates as applicable. A two-sided alpha level of  
5 0.05 will be used to judge statistical significance.  
6

7  
8 Model assumptions will be evaluated by a visual inspection of residuals and the sensitivity of  
9 the results to the use of a heteroskedastic-robust variance estimator. If evidence of departure  
10 from model assumptions is present, then the analysis will be modified to utilize an empirical  
11 variance estimator.  
12

### 13 14 **Patient and Public Involvement**

15 The intervention, comprehensively described elsewhere [40], was developed based on the  
16 input from clients/families and health professionals in a series of three in-person stakeholder  
17 meetings held in late 2013 and early 2014. The pilot of the study methodology was conducted  
18 in 2014 with the collaboration, input, and funding from a regional, public-sector, home care  
19 provider (HNHB LHIN). Participating clients and health professionals provided input into the  
20 intervention (and study design for health professionals) through telephone interviews using a  
21 structured questionnaire focused on the perceived benefit and utility of the interventions,  
22 overall satisfaction, and areas for improvement. The outcomes of the pilot study were featured  
23 in the home care providers annual report to the community.  
24  
25  
26

27  
28 The present protocol, based on the aforementioned pilot study, received input from health  
29 professionals in each participating region through a series of in-person planning meetings in  
30 mid-2017. The general public was engaged in one region through a local radio program.  
31 Adaptations and modifications to the intervention in each region to account for their unique  
32 health service context will be described in a forthcoming implementation publication. The  
33 experience of participating clients and health professionals will be investigated in a program  
34 evaluation and qualitative study to be conducted in parallel. The results of the trial are  
35 expected to be released to the study participants and public through regional public reports.  
36  
37  
38  
39

### 40 **ETHICS AND DISSEMINATION**

#### 41 **Harm**

42 This trial is unlikely to cause additional risk of harm since the various components of the  
43 intervention are already available from home care agencies and service providers, though rarely  
44 offered in the standard care plan. Direct risks to the health of the client are minimal as none of  
45 the components of the intervention are novel interventions. Each element of the intervention  
46 has been shown to be safe individually. Clients in the control group will continue to receive  
47 their usual care, while clients in the intervention group will receive usual care plus increased  
48 access to additional home care services defined by the cardio-respiratory treatment model. A  
49 Data Monitoring and Ethics (or equivalent) Committee was not required, and formal stopping  
50 rules or interim analyses are not planned.  
51  
52  
53

#### 54 **Ethical approval**

55  
56  
57  
58  
59  
60

1  
2  
3 We have received ethics approval from the Hamilton-Integrated Research Ethics Board, Health  
4 Research Ethics Authority for Western Health, and the Clinical Research Ethics Board for  
5 Vancouver Island (see supplementary file).  
6  
7

### 8 **Results dissemination**

9 We aim to make the results of this study public through peer-reviewed publications, clinical  
10 trial registry, thesis manuscripts, conference publications, and notifications to our trial partners,  
11 who will include the findings in their regular newsletters and annual reports to clients, partners,  
12 and government.  
13  
14

### 15 **DISCUSSION**

16 In summary, this pragmatic, cluster-randomized, multi-center superiority trial will investigate  
17 the effectiveness of a cardio-respiratory disease management model in a targeted home care  
18 client population, with case finding occurring using the DIVERT scale[19]. By offering a person-  
19 centered, multi-component cardio-respiratory management model to home care clients at the  
20 highest levels of risk,[40] we hope to determine if unplanned ED visits are postponed, clients  
21 have increased activation in their care, symptoms are reduced, and that the care model is cost-  
22 effective.  
23  
24

25  
26 This pragmatic trial will inform how multi-component cardio-respiratory care interventions are  
27 received as they are delivered in real-world conditions. Historically, trials investigating  
28 community programs have excluded frail seniors who would be at high-risk of ED services.  
29 Additionally, other trials have tended to focus on post-acute care and have not targeted high-  
30 risk clients when assessing community-based chronic disease management interventions.  
31  
32

33  
34 The need for appropriate and targeted supportive chronic disease management is a clear and  
35 compelling health services issue, and is reflected in new provincial government investments  
36 into the sector. This trial will be an important precedent around the creation of more upstream  
37 approaches to care for home-care clients that help to take further pressure of hospitals and EDs  
38 that are already facing issues of overcrowding across Canada.  
39  
40  
41  
42  
43  
44  
45  
46  
47  
48  
49  
50  
51  
52  
53  
54  
55  
56  
57  
58  
59  
60

### Author Contributions

APC is the principal investigator and led the conceptualization and design of the protocol, drafted, and revised the manuscript. CS, AJ, DD, MJ, and GC made contributions to the design and implementation of the study, and supported the manuscript. GA, CB, VB, SB, DF, PH, GH, JH, LL, RM, LM, and SS are co-investigators that contributed to the design of the study, and revised the manuscript. JD, TP, JR, RG, DM, and DH are trial partners who contributed to the design and implementation of the study. All authors critically revised the manuscript and approved the final version of this manuscript.

### Competing interests

It should be noted that DHF has a proprietary interest in Health Utilities Incorporated, Dundas, Ontario, Canada. HUInc distributes copyrighted Health Utilities Index (HUI) materials and provides methodological advice on the use of the HUI. All others author have no competing interests.

### Funding statement

Andrew Costa is supported by the Schlegel Chair in Clinical Epidemiology & Aging, McMaster University. This work was supported by Canadian Institutes of Health Research (CIHR; grant number 148933) and pilot funding from the Canadian Frailty Network (CFN; grant number 2015-15PB). This funding source has no role in the design of the study and will not have a role in its execution, analyses, interpretation of data, or decision to submit results.

### Acknowledgements

The authors wish to thank the regional home care providers for their leadership and involvement in the study: Hamilton-Niagara-Haldimand-Brant Local Health Integration Network (HNHB LHIN) in Ontario, Western Health in Newfoundland, and Island Health in British Columbia.

## REFERENCES

- 1 Wilkins K. Government-subsidized Home Care. Ottawa, ON: : Statistics Canada 2006. <https://www.ncbi.nlm.nih.gov/pubmed/17111593> (accessed 22 Aug 2018).
- 2 Seggewiss K. Variations in home care programs across Canada demonstrate need for national standards and pan-Canadian program. *CMAJ* 2009;**180**:E90–2. doi:10.1503/cmaj.090819
- 3 Health Council of Canada. Seniors in need, caregivers in distress: What are home care priorities for seniors in Canada? 2012. [http://www.carp.ca/wp-content/uploads/2012/04/HCC\\_HomeCare\\_2d.pdf](http://www.carp.ca/wp-content/uploads/2012/04/HCC_HomeCare_2d.pdf) (accessed 24 May 2018).
- 4 Jones A, Schumacher C, Bronskill SE, *et al*. The association between home care visits and same-day emergency department use: a case-crossover study. *Can Med Assoc J* 2018;**190**:E525–31. doi:10.1503/cmaj.170892
- 5 Gray LC, Peel NM, Costa AP, *et al*. Profiles of Older Patients in the Emergency Department: Findings From the interRAI Multinational Emergency Department Study. *Ann Emerg Med* 2013;**62**:467–74. doi:10.1016/j.annemergmed.2013.05.008
- 6 Salvi F, Morichi V, Grilli A, *et al*. The elderly in the emergency department: a critical review of problems and solutions. *Intern Emerg Med* 2007;**2**:292–301. doi:10.1007/s11739-007-0081-3
- 7 Wagner EH, Davis C, Schaefer J, *et al*. A Survey of Leading Chronic Disease Management Programs: Are They Consistent with the Literature?: *Manag Care Q* 1999;**7**:56–66.
- 8 Wagner EH. Chronic disease management: what will it take to improve care for chronic illness? *Eff Clin Pract* 1998;**1**:2–4.
- 9 Wagner EH. More than a case manager. *Ann Intern Med* 1998;**129**:654–6.
- 10 Becker DM, Raqueño JV, Yook RM, *et al*. Nurse-mediated cholesterol management compared with enhanced primary care in siblings of individuals with premature coronary disease. *Arch Intern Med* 1998;**158**:1533–9.
- 11 Aubert RE, Herman WH, Waters J, *et al*. Nurse case management to improve glycemic control in diabetic patients in a health maintenance organization. A randomized, controlled trial. *Ann Intern Med* 1998;**129**:605–12.
- 12 Von Korff M, Gruman J, Schaefer J, *et al*. Collaborative management of chronic illness. *Ann Intern Med* 1997;**127**:1097–102.



- 13 Weinberger M, Oddone EZ, Henderson WG. Does increased access to primary care reduce hospital readmissions? Veterans Affairs Cooperative Study Group on Primary Care and Hospital Readmission. *N Engl J Med* 1996;**334**:1441–7. doi:10.1056/NEJM199605303342206
- 14 Wasson J, Gaudette C, Whaley F, *et al.* Telephone care as a substitute for routine clinic follow-up. *JAMA* 1992;**267**:1788–93.
- 15 Mukamel DB, Chou CC, Zimmer JG, *et al.* The effect of accurate patient screening on the cost-effectiveness of case management programs. *The Gerontologist* 1997;**37**:777–84.
- 16 Stuck AE, Elkuch P, Dapp U, *et al.* Feasibility and yield of a self-administered questionnaire for health risk appraisal in older people in three European countries. *Age Ageing* 2002;**31**:463–7.
- 17 Cardiac Care Network of Ontario. Strategy for Community Management of Heart Failure in Ontario. 2014.
- 18 Health Quality Ontario. Key Observations: 2014-15 Quality Improvement Plans Community Care Access Centres. Toronto, ON: : Queen’s Printer for Ontario 2014.
- 19 Costa A, Hirdes JP, Bell CM, *et al.* Derivation and Validation of the Detection of Indicators and Vulnerabilities for Emergency Room Trips Scale for Classifying the Risk of Emergency Department Use in Frail Community-Dwelling Older Adults. *J Am Geriatr Soc* 2015;**63**:763–9. doi:10.1111/jgs.13336
- 20 Tsisis P. Chronic disease management and the home-care alternative in Ontario, Canada. *Health Serv Manage Res* 2009;**22**:136–9. doi:10.1258/hsmr.2009.009002
- 21 Grimshaw JM, Shirran L, Thomas R, *et al.* Changing provider behavior: an overview of systematic reviews of interventions. *Med Care* 2001;**39**:II2-45.
- 22 American Geriatrics Society Expert Panel on Person-Centered Care. Person-Centered Care: A Definition and Essential Elements. *J Am Geriatr Soc* 2016;**64**:15–8. doi:10.1111/jgs.13866
- 23 Ministry of Health and Long-Term Care. 2015 Minister’s Medal Winners. 2016.[http://www.health.gov.on.ca/en/pro/programs/transformation/minister\\_medal\\_2015.aspx](http://www.health.gov.on.ca/en/pro/programs/transformation/minister_medal_2015.aspx) (accessed 18 Feb 2018).
- 24 Costa A, Haughton D, Heckman G, *et al.* The DIVERT-CARE catalyst trial: Targeted chronic-disease management for home care clients. *Innov Aging* 2017;**1**:322–3. doi:10.1093/geroni/igx004.1190
- 25 Dhalla IA, O’Brien T, Morra D, *et al.* Effect of a postdischarge virtual ward on readmission or death for high-risk patients: a randomized clinical trial. *JAMA* 2014;**312**:1305–12. doi:10.1001/jama.2014.11492

- 1  
2  
3 26 Van Spall HGC, Lee SF, Xie F, *et al.* Effect of Patient-Centered Transitional Care Services on  
4 Clinical Outcomes in Patients Hospitalized for Heart Failure: The PACT-HF Randomized  
5 Clinical Trial. *J Am Med Assoc* 2019;**321**:753–61. doi:10.1001/jama.2019.0710  
6  
7  
8 27 Beswick AD, Rees K, Dieppe P, *et al.* Complex interventions to improve physical function and  
9 maintain independent living in elderly people: a systematic review and meta-analysis.  
10 *Lancet* 2008;**371**:725–35. doi:10.1016/S0140-6736(08)60342-6  
11  
12 28 Schwartz D, Lellouch J. Explanatory and pragmatic attitudes in therapeutical trials. *J Clin*  
13 *Epidemiol* 2009;**62**:499–505. doi:10.1016/j.jclinepi.2009.01.012  
14  
15  
16 29 Rothwell PM. External validity of randomised controlled trials: “to whom do the results of  
17 this trial apply?” *Lancet Lond Engl* 2005;**365**:82–93. doi:10.1016/S0140-6736(04)17670-8  
18  
19  
20 30 Dickinson LM, Beaty B, Fox C, *et al.* Pragmatic Cluster Randomized Trials Using Covariate  
21 Constrained Randomization: A Method for Practice-based Research Networks (PBRNs). *J Am*  
22 *Board Fam Med* 2015;**28**:663–72. doi:10.3122/jabfm.2015.05.150001  
23  
24 31 Hemming K, Haines TP, Chilton PJ, *et al.* The stepped wedge cluster randomised trial:  
25 rationale, design, analysis, and reporting. *BMJ* 2015;**350**:h391.  
26  
27  
28 32 Anderson GL, Burns CJ, Larsen J, *et al.* Use of administrative data to increase the practicality  
29 of clinical trials: Insights from the Women’s Health Initiative. *Clin Trials* 2016;**13**:519–26.  
30 doi:10.1177/1740774516656579  
31  
32 33 Richards SH, Coast J, Peters TJ. Patient-reported use of health service resources compared  
33 with information from health providers. *Health Soc Care Community* 2003;**11**:510–8.  
34  
35  
36 34 Richard E, Van den Heuvel E, Moll van Charante EP, *et al.* Prevention of dementia by  
37 intensive vascular care (PreDIVA): a cluster-randomized trial in progress. *Alzheimer Dis*  
38 *Assoc Disord* 2009;**23**:198–204. doi:10.1097/WAD.0b013e31819783a4  
39  
40  
41 35 Kaczorowski J, Chambers LW, Dolovich L, *et al.* Improving cardiovascular health at  
42 population level: 39 community cluster randomised trial of Cardiovascular Health  
43 Awareness Program (CHAP). *BMJ* 2011;**342**:d442.  
44  
45  
46 36 Steventon A, Bardsley M, Billings J, *et al.* Effect of telehealth on use of secondary care and  
47 mortality: findings from the Whole System Demonstrator cluster randomised trial. *BMJ*  
48 2012;**344**:e3874.  
49  
50  
51 37 Evans CD, Eurich DT, Taylor JG, *et al.* A pragmatic cluster randomized trial evaluating the  
52 impact of a community pharmacy intervention on statin adherence: rationale and design of  
53 the Community Pharmacy Assisting in Total Cardiovascular Health (CPATCH) study. *Trials*  
54 2010;**11**:76. doi:10.1186/1745-6215-11-76  
55  
56  
57  
58  
59

- 1  
2  
3 38 Chan A-W, Tetzlaff JM, Altman DG, *et al.* SPIRIT 2013 Statement: Defining Standard Protocol  
4 Items for Clinical Trials. *Ann Intern Med* 2013;**158**:200. doi:10.7326/0003-4819-158-3-  
5 201302050-00583  
6  
7  
8 39 Schulz KF, Altman DG, Moher D, *et al.* CONSORT 2010 Statement: updated guidelines for  
9 reporting parallel group randomised trials. *Trials* 2010;**11**:32. doi:10.1186/1745-6215-11-32  
10  
11 40 Schumacher C, Lackey C, Haughton D, *et al.* A chronic disease management model for home  
12 care patients with cardio-respiratory symptoms: the DIVERT-CARE Intervention. *Can J*  
13 *Cardiovasc Nurs* 2018;**28**:18–26.  
14  
15  
16 41 Wodchis WP, Hirdes JP, Feeny DH. Health-related quality of life measure based on the  
17 minimum data set. *Int J Technol Assess Health Care* 2003;**19**:490–506.  
18  
19  
20 42 Jones A, Feeny D, Costa AP. Longitudinal construct validity of the minimum data set health  
21 status index. *Health Qual Life Outcomes* 2018;**16**:102. doi:10.1186/s12955-018-0932-9  
22  
23 43 Canadian Institutes of Health Research, Natural Sciences and Engineering Research Council  
24 of Canada, Social Sciences and Humanities Research Council of Canada. Tri-council policy  
25 statement: Ethical conduct for research involving humans 2014. 2014.  
26 [http://www.pre.ethics.gc.ca/pdf/eng/tcps2-2014/TCPS\\_2\\_FINAL\\_Web.pdf](http://www.pre.ethics.gc.ca/pdf/eng/tcps2-2014/TCPS_2_FINAL_Web.pdf)  
27  
28  
29 44 Medical Research Council. Cluster randomised trials: Methodological and ethical  
30 considerations. London: Medical Research Council 2002.  
31  
32 45 Howlett JG, Chan M, Ezekowitz JA, *et al.* The Canadian Cardiovascular Society Heart Failure  
33 Companion: Bridging Guidelines to Your Practice. *Can J Cardiol* 2016;**32**:296–310.  
34 doi:10.1016/j.cjca.2015.06.019  
35  
36  
37 46 O'Donnell DE, Hernandez P, Kaplan A, *et al.* Canadian Thoracic Society recommendations  
38 for management of chronic obstructive pulmonary disease - 2008 update - highlights for  
39 primary care. *Can Respir J* 2008;**15 Suppl A**:1A-8A. doi:10.1155/2008/641965  
40  
41  
42 47 Beckett CD, Kipnis G. Collaborative communication: integrating SBAR to improve  
43 quality/patient safety outcomes. *J Healthc Qual* 2009;**31**:19–28.  
44  
45  
46 48 Wagner EH. Population-based management of diabetes care. *Patient Educ Couns*  
47 1995;**26**:225–30.  
48  
49 49 Morris JN, Fries BE, Steel K, *et al.* Comprehensive Clinical Assessment in Community Setting:  
50 Applicability of the MDS-HC. *J Am Geriatr Soc* 1997;**45**:1017–24. doi:10.1111/j.1532-  
51 5415.1997.tb02975.x  
52  
53 50 Kwan C-W, Chi I, Lam T-P, *et al.* Validation of Minimum Data Set for Home Care Assessment  
54 Instrument (MDS-HC) for Hong Kong Chinese Elders. *Clin Gerontol* 2000;**21**:35–48.  
55 doi:10.1300/J018v21n04\_04  
56  
57  
58  
59

- 1  
2  
3 51 Leung AC, Liu CP, Tsui LL, *et al*. The use of the Minimum Data Set. Home Care in a case  
4 management project in Hong Kong. *Care Manag J* 2001;**3**:8–13.  
5  
6  
7 52 Landi F, Tua E, Onder G, *et al*. Minimum Data Set for Home Care: A Valid Instrument to  
8 Assess Frail Older People Living in the Community. *Med Care* 2000;**38**:1184–90.  
9  
10 53 Hirdes JP, Ljunggren G, Morris JN, *et al*. Reliability of the interRAI suite of assessment  
11 instruments: a 12-country study of an integrated health information system. *BMC Health*  
12 *Serv Res* 2008;**8**:277. doi:10.1186/1472-6963-8-277  
13  
14 54 Hibbard JH, Stockard J, Mahoney ER, *et al*. Development of the Patient Activation Measure  
15 (PAM): Conceptualizing and Measuring Activation in Patients and Consumers. *Health Serv*  
16 *Res* 2004;**39**:1005–26. doi:10.1111/j.1475-6773.2004.00269.x  
17  
18 55 Mosen DM, Schmittdiel J, Hibbard J, *et al*. Is patient activation associated with outcomes of  
19 care for adults with chronic conditions? *J Ambulatory Care Manage* 2007;**30**:21–9.  
20  
21 56 Greene J, Hibbard JH. Why Does Patient Activation Matter? An Examination of the  
22 Relationships Between Patient Activation and Health-Related Outcomes. *J Gen Intern Med*  
23 2012;**27**:520–6. doi:10.1007/s11606-011-1931-2  
24  
25  
26  
27  
28  
29  
30  
31  
32  
33  
34  
35  
36  
37  
38  
39  
40  
41  
42  
43  
44  
45  
46  
47  
48  
49  
50  
51  
52  
53  
54  
55  
56  
57  
58  
59  
60

1  
2  
3  
4  
5  
6  
7  
8  
9  
10  
11  
12  
13  
14  
15  
16  
17  
18  
19  
20  
21  
22  
23  
24  
25  
26  
27  
28  
29  
30  
31  
32  
33  
34  
35  
36  
37  
38  
39  
40  
41  
42  
43  
44  
45  
46  
47  
48  
49  
50  
51  
52  
53  
54  
55  
56  
57  
58  
59  
60



Figure 1: Caseload Randomization Schematic

368x222mm (300 x 300 DPI)

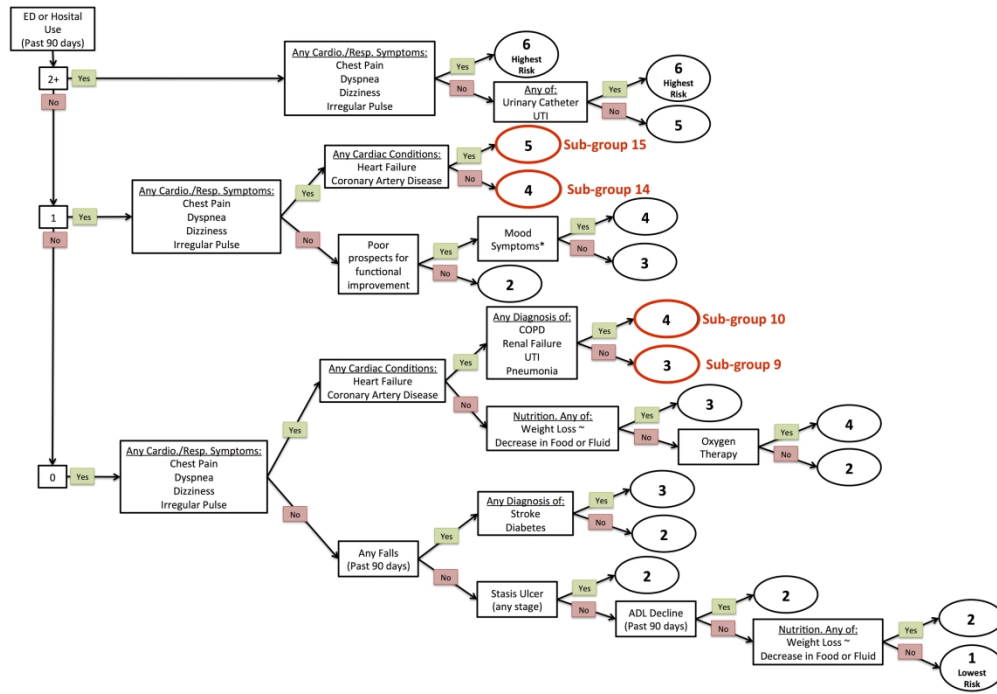

Figure 2: DIVERT Scale Target Groups  
254x175mm (300 x 300 DPI)

## Ethical approval – detailed supplement.

|                                            |                                                                                                                        |                                                     |                                                          |
|--------------------------------------------|------------------------------------------------------------------------------------------------------------------------|-----------------------------------------------------|----------------------------------------------------------|
| <b>DIVERT CARE Site:</b>                   | Haldimand Brant Community Local Health Integration Network (Hamilton, Ontario) & McMaster University– <b>LEAD SITE</b> | Island Health (Victoria, British Columbia)          | Western Health (Corner Brook, Newfoundland and Labrador) |
| <b>Full name of the ethical committee:</b> | Hamilton-Integrated Research Ethics Board                                                                              | Clinical Research Ethics Board for Vancouver Island | Health Research Ethics Authority for Western Health      |
| <b>Reference Number:</b>                   | # 2651                                                                                                                 | C2017-014                                           | # 20171652                                               |

# Reporting checklist for protocol of a clinical trial.

Based on the SPIRIT guidelines.

## Instructions to authors

Complete this checklist by entering the page numbers from your manuscript where readers will find each of the items listed below.

Your article may not currently address all the items on the checklist. Please modify your text to include the missing information. If you are certain that an item does not apply, please write "n/a" and provide a short explanation.

Upload your completed checklist as an extra file when you submit to a journal.

In your methods section, say that you used the SPIRIT reporting guidelines, and cite them as:

Chan A-W, Tetzlaff JM, Altman DG, Laupacis A, Gøtzsche PC, Krleža-Jerić K, Hróbjartsson A, Mann H, Dickersin K, Berlin J, Doré C, Parulekar W, Summerskill W, Groves T, Schulz K, Sox H, Rockhold FW, Rennie D, Moher D. SPIRIT 2013 Statement: Defining standard protocol items for clinical trials. *Ann Intern Med.* 2013;158(3):200-207

|                                             |     | Reporting Item                                                                                               | Page Number |
|---------------------------------------------|-----|--------------------------------------------------------------------------------------------------------------|-------------|
| Title                                       | #1  | Descriptive title identifying the study design, population, interventions, and, if applicable, trial acronym | 1           |
| Trial registration                          | #2a | Trial identifier and registry name. If not yet registered, name of intended registry                         | 3           |
| Trial registration: data set                | #2b | All items from the World Health Organization Trial Registration Data Set                                     | 7-8         |
| Protocol version                            | #3  | Date and version identifier                                                                                  | 7           |
| Funding                                     | #4  | Sources and types of financial, material, and other support                                                  | 17          |
| Roles and responsibilities: contributorship | #5a | Names, affiliations, and roles of protocol contributors                                                      | 17          |
| Roles and responsibilities:                 | #5b | Name and contact information for the trial sponsor                                                           | 17          |



|    |                      |      |                                                                          |    |
|----|----------------------|------|--------------------------------------------------------------------------|----|
| 1  | sponsor contact      |      |                                                                          |    |
| 2  | information          |      |                                                                          |    |
| 3  |                      |      |                                                                          |    |
| 4  | Roles and            | #5c  | Role of study sponsor and funders, if any, in study design;              | 17 |
| 5  | responsibilities:    |      | collection, management, analysis, and interpretation of data; writing    |    |
| 6  | sponsor and funder   |      | of the report; and the decision to submit the report for publication,    |    |
| 7  |                      |      | including whether they will have ultimate authority over any of these    |    |
| 8  |                      |      | activities                                                               |    |
| 9  |                      |      |                                                                          |    |
| 10 |                      |      |                                                                          |    |
| 11 |                      |      |                                                                          |    |
| 12 | Roles and            | #5d  | Composition, roles, and responsibilities of the coordinating centre,     | 17 |
| 13 | responsibilities:    |      | steering committee, endpoint adjudication committee, data                |    |
| 14 | committees           |      | management team, and other individuals or groups overseeing the          |    |
| 15 |                      |      | trial, if applicable (see Item 21a for data monitoring committee)        |    |
| 16 |                      |      |                                                                          |    |
| 17 |                      |      |                                                                          |    |
| 18 |                      |      |                                                                          |    |
| 19 | Background and       | #6a  | Description of research question and justification for undertaking the   | 5  |
| 20 | rationale            |      | trial, including summary of relevant studies (published and              |    |
| 21 |                      |      | unpublished) examining benefits and harms for each intervention          |    |
| 22 |                      |      |                                                                          |    |
| 23 |                      |      |                                                                          |    |
| 24 | Background and       | #6b  | Explanation for choice of comparators                                    | 9  |
| 25 | rationale: choice of |      |                                                                          |    |
| 26 | comparators          |      |                                                                          |    |
| 27 |                      |      |                                                                          |    |
| 28 |                      |      |                                                                          |    |
| 29 | Objectives           | #7   | Specific objectives or hypotheses                                        | 8  |
| 30 |                      |      |                                                                          |    |
| 31 |                      |      |                                                                          |    |
| 32 | Trial design         | #8   | Description of trial design including type of trial (eg, parallel group, | 6  |
| 33 |                      |      | crossover, factorial, single group), allocation ratio, and framework     |    |
| 34 |                      |      | (eg, superiority, equivalence, non-inferiority, exploratory)             |    |
| 35 |                      |      |                                                                          |    |
| 36 |                      |      |                                                                          |    |
| 37 | Study setting        | #9   | Description of study settings (eg, community clinic, academic            | 6  |
| 38 |                      |      | hospital) and list of countries where data will be collected. Reference  |    |
| 39 |                      |      | to where list of study sites can be obtained                             |    |
| 40 |                      |      |                                                                          |    |
| 41 |                      |      |                                                                          |    |
| 42 | Eligibility criteria | #10  | Inclusion and exclusion criteria for participants. If applicable,        | 9  |
| 43 |                      |      | eligibility criteria for study centres and individuals who will perform  |    |
| 44 |                      |      | the interventions (eg, surgeons, psychotherapists)                       |    |
| 45 |                      |      |                                                                          |    |
| 46 |                      |      |                                                                          |    |
| 47 |                      |      |                                                                          |    |
| 48 | Interventions:       | #11a | Interventions for each group with sufficient detail to allow             | 10 |
| 49 | description          |      | replication, including how and when they will be administered            |    |
| 50 |                      |      |                                                                          |    |
| 51 |                      |      |                                                                          |    |
| 52 | Interventions:       | #11b | Criteria for discontinuing or modifying allocated interventions for a    | 10 |
| 53 | modifications        |      | given trial participant (eg, drug dose change in response to harms,      |    |
| 54 |                      |      | participant request, or improving / worsening disease)                   |    |
| 55 |                      |      |                                                                          |    |
| 56 |                      |      |                                                                          |    |
| 57 | Interventions:       | #11c | Strategies to improve adherence to intervention protocols, and any       | 11 |
| 58 | adherence            |      | procedures for monitoring adherence (eg, drug tablet return;             |    |
| 59 |                      |      |                                                                          |    |
| 60 |                      |      |                                                                          |    |

|    |                      |                   |                                                                        |
|----|----------------------|-------------------|------------------------------------------------------------------------|
|    |                      | laboratory tests) |                                                                        |
| 1  |                      |                   |                                                                        |
| 2  |                      |                   |                                                                        |
| 3  | Interventions:       | #11d              | Relevant concomitant care and interventions that are permitted or      |
| 4  | concomitant care     |                   | prohibited during the trial                                            |
| 5  |                      |                   |                                                                        |
| 6  | Outcomes             | #12               | Primary, secondary, and other outcomes, including the specific         |
| 7  |                      |                   | measurement variable (eg, systolic blood pressure), analysis metric    |
| 8  |                      |                   | (eg, change from baseline, final value, time to event), method of      |
| 9  |                      |                   | aggregation (eg, median, proportion), and time point for each          |
| 10 |                      |                   | outcome. Explanation of the clinical relevance of chosen efficacy      |
| 11 |                      |                   | and harm outcomes is strongly recommended                              |
| 12 |                      |                   |                                                                        |
| 13 |                      |                   |                                                                        |
| 14 |                      |                   |                                                                        |
| 15 |                      |                   |                                                                        |
| 16 | Participant timeline | #13               | Time schedule of enrolment, interventions (including any run-ins       |
| 17 |                      |                   | and washouts), assessments, and visits for participants. A schematic   |
| 18 |                      |                   | diagram is highly recommended (see Figure)                             |
| 19 |                      |                   |                                                                        |
| 20 |                      |                   |                                                                        |
| 21 | Sample size          | #14               | Estimated number of participants needed to achieve study objectives    |
| 22 |                      |                   | and how it was determined, including clinical and statistical          |
| 23 |                      |                   | assumptions supporting any sample size calculations                    |
| 24 |                      |                   |                                                                        |
| 25 |                      |                   |                                                                        |
| 26 | Recruitment          | #15               | Strategies for achieving adequate participant enrolment to reach       |
| 27 |                      |                   | target sample size                                                     |
| 28 |                      |                   |                                                                        |
| 29 |                      |                   |                                                                        |
| 30 | Allocation: sequence | #16a              | Method of generating the allocation sequence (eg, computer-            |
| 31 | generation           |                   | generated random numbers), and list of any factors for stratification. |
| 32 |                      |                   | To reduce predictability of a random sequence, details of any          |
| 33 |                      |                   | planned restriction (eg, blocking) should be provided in a separate    |
| 34 |                      |                   | document that is unavailable to those who enrol participants or        |
| 35 |                      |                   | assign interventions                                                   |
| 36 |                      |                   |                                                                        |
| 37 |                      |                   |                                                                        |
| 38 |                      |                   |                                                                        |
| 39 |                      |                   |                                                                        |
| 40 | Allocation           | #16b              | Mechanism of implementing the allocation sequence (eg, central         |
| 41 | concealment          |                   | telephone; sequentially numbered, opaque, sealed envelopes),           |
| 42 | mechanism            |                   | describing any steps to conceal the sequence until interventions are   |
| 43 |                      |                   | assigned                                                               |
| 44 |                      |                   |                                                                        |
| 45 |                      |                   |                                                                        |
| 46 |                      |                   |                                                                        |
| 47 | Allocation:          | #16c              | Who will generate the allocation sequence, who will enrol              |
| 48 | implementation       |                   | participants, and who will assign participants to interventions        |
| 49 |                      |                   |                                                                        |
| 50 |                      |                   |                                                                        |
| 51 | Blinding (masking)   | #17a              | Who will be blinded after assignment to interventions (eg, trial       |
| 52 |                      |                   | participants, care providers, outcome assessors, data analysts), and   |
| 53 |                      |                   | how                                                                    |
| 54 |                      |                   |                                                                        |
| 55 |                      |                   |                                                                        |
| 56 | Blinding (masking):  | #17b              | If blinded, circumstances under which unblinding is permissible, and   |
| 57 | emergency            |                   | procedure for revealing a participant's allocated intervention during  |
| 58 |                      |                   |                                                                        |
| 59 |                      |                   |                                                                        |
| 60 |                      |                   |                                                                        |

|    |                        |      |                                                                         |    |
|----|------------------------|------|-------------------------------------------------------------------------|----|
| 1  | unblinding             |      | the trial                                                               |    |
| 2  |                        |      |                                                                         |    |
| 3  | Data collection plan   | #18a | Plans for assessment and collection of outcome, baseline, and other     | 13 |
| 4  |                        |      | trial data, including any related processes to promote data quality     |    |
| 5  |                        |      | (eg, duplicate measurements, training of assessors) and a description   |    |
| 6  |                        |      | of study instruments (eg, questionnaires, laboratory tests) along with  |    |
| 7  |                        |      | their reliability and validity, if known. Reference to where data       |    |
| 8  |                        |      | collection forms can be found, if not in the protocol                   |    |
| 9  |                        |      |                                                                         |    |
| 10 |                        |      |                                                                         |    |
| 11 |                        |      |                                                                         |    |
| 12 | Data collection plan:  | #18b | Plans to promote participant retention and complete follow-up,          | 13 |
| 13 | retention              |      | including list of any outcome data to be collected for participants     |    |
| 14 |                        |      | who discontinue or deviate from intervention protocols                  |    |
| 15 |                        |      |                                                                         |    |
| 16 |                        |      |                                                                         |    |
| 17 | Data management        | #19  | Plans for data entry, coding, security, and storage, including any      | 13 |
| 18 |                        |      | related processes to promote data quality (eg, double data entry;       |    |
| 19 |                        |      | range checks for data values). Reference to where details of data       |    |
| 20 |                        |      | management procedures can be found, if not in the protocol              |    |
| 21 |                        |      |                                                                         |    |
| 22 |                        |      |                                                                         |    |
| 23 |                        |      |                                                                         |    |
| 24 | Statistics: outcomes   | #20a | Statistical methods for analysing primary and secondary outcomes.       | 14 |
| 25 |                        |      | Reference to where other details of the statistical analysis plan can   |    |
| 26 |                        |      | be found, if not in the protocol                                        |    |
| 27 |                        |      |                                                                         |    |
| 28 |                        |      |                                                                         |    |
| 29 |                        |      |                                                                         |    |
| 30 | Statistics: additional | #20b | Methods for any additional analyses (eg, subgroup and adjusted          | 14 |
| 31 | analyses               |      | analyses)                                                               |    |
| 32 |                        |      |                                                                         |    |
| 33 |                        |      |                                                                         |    |
| 34 | Statistics: analysis   | #20c | Definition of analysis population relating to protocol non-adherence    | 14 |
| 35 | population and         |      | (eg, as randomised analysis), and any statistical methods to handle     |    |
| 36 | missing data           |      | missing data (eg, multiple imputation)                                  |    |
| 37 |                        |      |                                                                         |    |
| 38 |                        |      |                                                                         |    |
| 39 | Data monitoring:       | #21a | Composition of data monitoring committee (DMC); summary of its          | 15 |
| 40 | formal committee       |      | role and reporting structure; statement of whether it is independent    |    |
| 41 |                        |      | from the sponsor and competing interests; and reference to where        |    |
| 42 |                        |      | further details about its charter can be found, if not in the protocol. |    |
| 43 |                        |      | Alternatively, an explanation of why a DMC is not needed                |    |
| 44 |                        |      |                                                                         |    |
| 45 |                        |      |                                                                         |    |
| 46 |                        |      |                                                                         |    |
| 47 | Data monitoring:       | #21b | Description of any interim analyses and stopping guidelines,            | 15 |
| 48 | interim analysis       |      | including who will have access to these interim results and make the    |    |
| 49 |                        |      | final decision to terminate the trial                                   |    |
| 50 |                        |      |                                                                         |    |
| 51 |                        |      |                                                                         |    |
| 52 |                        |      |                                                                         |    |
| 53 | Harms                  | #22  | Plans for collecting, assessing, reporting, and managing solicited and  | 15 |
| 54 |                        |      | spontaneously reported adverse events and other unintended effects      |    |
| 55 |                        |      | of trial interventions or trial conduct                                 |    |
| 56 |                        |      |                                                                         |    |
| 57 |                        |      |                                                                         |    |
| 58 | Auditing               | #23  | Frequency and procedures for auditing trial conduct, if any, and        | 15 |
| 59 |                        |      |                                                                         |    |
| 60 |                        |      |                                                                         |    |

|    |                       |                                                                            |     |
|----|-----------------------|----------------------------------------------------------------------------|-----|
|    |                       | whether the process will be independent from investigators and the sponsor |     |
| 1  |                       |                                                                            |     |
| 2  |                       |                                                                            |     |
| 3  |                       |                                                                            |     |
| 4  | Research ethics       | #24 Plans for seeking research ethics committee / institutional review     | 16  |
| 5  | approval              | board (REC / IRB) approval                                                 |     |
| 6  |                       |                                                                            |     |
| 7  |                       |                                                                            |     |
| 8  | Protocol amendments   | #25 Plans for communicating important protocol modifications (eg,          | 16  |
| 9  |                       | changes to eligibility criteria, outcomes, analyses) to relevant parties   |     |
| 10 |                       | (eg, investigators, REC / IRBs, trial participants, trial registries,      |     |
| 11 |                       | journals, regulators)                                                      |     |
| 12 |                       |                                                                            |     |
| 13 |                       |                                                                            |     |
| 14 | Consent or assent     | #26a Who will obtain informed consent or assent from potential trial       | 9   |
| 15 |                       | participants or authorised surrogates, and how (see Item 32)               |     |
| 16 |                       |                                                                            |     |
| 17 |                       |                                                                            |     |
| 18 | Consent or assent:    | #26b Additional consent provisions for collection and use of participant   | 9   |
| 19 | ancillary studies     | data and biological specimens in ancillary studies, if applicable          |     |
| 20 |                       |                                                                            |     |
| 21 |                       |                                                                            |     |
| 22 | Confidentiality       | #27 How personal information about potential and enrolled participants     | 16  |
| 23 |                       | will be collected, shared, and maintained in order to protect              |     |
| 24 |                       | confidentiality before, during, and after the trial                        |     |
| 25 |                       |                                                                            |     |
| 26 |                       |                                                                            |     |
| 27 | Declaration of        | #28 Financial and other competing interests for principal investigators    | 17  |
| 28 | interests             | for the overall trial and each study site                                  |     |
| 29 |                       |                                                                            |     |
| 30 |                       |                                                                            |     |
| 31 | Data access           | #29 Statement of who will have access to the final trial dataset, and      | 17  |
| 32 |                       | disclosure of contractual agreements that limit such access for            |     |
| 33 |                       | investigators                                                              |     |
| 34 |                       |                                                                            |     |
| 35 |                       |                                                                            |     |
| 36 | Ancillary and post    | #30 Provisions, if any, for ancillary and post-trial care, and for         | 9   |
| 37 | trial care            | compensation to those who suffer harm from trial participation             |     |
| 38 |                       |                                                                            |     |
| 39 |                       |                                                                            |     |
| 40 | Dissemination policy: | #31a Plans for investigators and sponsor to communicate trial results to   | 16  |
| 41 | trial results         | participants, healthcare professionals, the public, and other relevant     |     |
| 42 |                       | groups (eg, via publication, reporting in results databases, or other      |     |
| 43 |                       | data sharing arrangements), including any publication restrictions         |     |
| 44 |                       |                                                                            |     |
| 45 |                       |                                                                            |     |
| 46 |                       |                                                                            |     |
| 47 | Dissemination policy: | #31b Authorship eligibility guidelines and any intended use of             | 16  |
| 48 | authorship            | professional writers                                                       |     |
| 49 |                       |                                                                            |     |
| 50 |                       |                                                                            |     |
| 51 | Dissemination policy: | #31c Plans, if any, for granting public access to the full protocol,       | 16  |
| 52 | reproducible research | participant-level dataset, and statistical code                            |     |
| 53 |                       |                                                                            |     |
| 54 |                       |                                                                            |     |
| 55 | Informed consent      | #32 Model consent form and other related documentation given to            | N/A |
| 56 | materials             | participants and authorised surrogates                                     |     |
| 57 |                       |                                                                            |     |
| 58 |                       |                                                                            |     |
| 59 |                       |                                                                            |     |
| 60 |                       |                                                                            |     |

1 Biological specimens #33 Plans for collection, laboratory evaluation, and storage of biological N/A  
2 specimens for genetic or molecular analysis in the current trial and  
3 for future use in ancillary studies, if applicable  
4  
5

6 The SPIRIT checklist is distributed under the terms of the Creative Commons Attribution License CC-BY-ND  
7 3.0. This checklist was completed on 08. March 2019 using <https://www.goodreports.org/>, a tool made by the  
8 [EQUATOR Network](#) in collaboration with [Penelope.ai](#)  
9  
10  
11  
12  
13  
14  
15  
16  
17  
18  
19  
20  
21  
22  
23  
24  
25  
26  
27  
28  
29  
30  
31  
32  
33  
34  
35  
36  
37  
38  
39  
40  
41  
42  
43  
44  
45  
46  
47  
48  
49  
50  
51  
52  
53  
54  
55  
56  
57  
58  
59  
60
