# Supplementary material for: DIVERT-Collaboration Action Research and Evaluation (CARE) Trial Protocol: a multiprovincial pragmatic cluster randomised trial of cardiorespiratory management in home care
Source: PubMed Central journal article supplement — BMJ Open. 2019 Dec 15;9(12):e030301. doi: 10.1136/bmjopen-2019-030301 (PMC6924743; doi:10.1136/bmjopen-2019-030301), 2019-12-15
Supplement: bmjopen-2019-030301supp001.pdf [file bmjopen-2019-030301supp001.pdf]

**Ethical approval – detailed supplement.**

|                                            |                                                                                                                        |                                                     |                                                          |
|--------------------------------------------|------------------------------------------------------------------------------------------------------------------------|-----------------------------------------------------|----------------------------------------------------------|
| <b>DIVERT CARE Site:</b>                   | Haldimand Brant Community Local Health Integration Network (Hamilton, Ontario) & McMaster University– <b>LEAD SITE</b> | Island Health (Victoria, British Columbia)          | Western Health (Corner Brook, Newfoundland and Labrador) |
| <b>Full name of the ethical committee:</b> | Hamilton-Integrated Research Ethics Board                                                                              | Clinical Research Ethics Board for Vancouver Island | Health Research Ethics Authority for Western Health      |
| <b>Reference Number:</b>                   | # 2651                                                                                                                 | C2017-014                                           | # 20171652                                               |
